# Supplementary material for: WNT-induced association of Frizzled and LRP6 is not sufficient for the initiation of WNT/β-catenin signaling
Source: Nat Commun. 2025 May 24;16:4848. doi: 10.1038/s41467-025-60096-7 (PMC12103576; doi:10.1038/s41467-025-60096-7)
Supplement: Supplementary file 3 — Supplementary Data 1 [file 41467_2025_60096_MOESM3_ESM.xlsx]

## Sheet: 3A vs vehicle 
baseMean	log2FoldChange	pvalue	Ensembl	Gene Name
4.65416	6.04769	0.000565261	ENSG00000270870	AC004805.2
5.73389	6.02088	0.000335932	ENSG00000269713	NBPF9
4.41798	5.89032	0.00142987	ENSG00000085185	BCORL1
4.13892	5.67555	0.005165	ENSG00000232437	RPS26P42
3.1106	5.49387	0.00739842	ENSG00000236908	AC005865.1
4.05747	5.48619	0.000746916	ENSG00000267057	LINC01905
3.23357	5.44289	0.00798562	ENSG00000285777
2.85196	5.40524	0.0241803	ENSG00000279695	AL359757.2
2.76775	5.39676	0.0355161	ENSG00000259026	AL049833.2
2.79109	5.36812	0.0279301	ENSG00000176040	TMPRSS7
2.99135	5.31501	0.00866156	ENSG00000275234	AC010503.4
2.7686	5.31032	0.0197053	ENSG00000092820	EZR
2.67424	5.30379	0.0278987	ENSG00000172971	UNC93B3
2.70926	5.27395	0.0367457	ENSG00000239984	RN7SL420P
5.16539	5.27124	0.00219105	ENSG00000169783	LINGO1
2.96564	5.24892	0.00517884	ENSG00000261341	AC010325.1
2.77748	5.24593	0.0215442	ENSG00000237938	AL450998.3
3.44227	5.23464	0.00228185	ENSG00000281183	NPTN-IT1
2.45867	5.22879	0.0463576	ENSG00000278338	VWA8-AS1
2.45889	5.22657	0.0470042	ENSG00000232448	AL354824.2
2.74814	5.1659	0.0184035	ENSG00000270314	AC007161.2
2.77767	5.16512	0.0118047	ENSG00000183513	COA5
2.56096	5.15529	0.0168264	ENSG00000263968	RN7SL381P
2.66203	5.15074	0.0272651	ENSG00000279694	AC011270.2
2.388	5.09289	0.0317444	ENSG00000290760
3.06231	5.09021	0.00646051	ENSG00000258553	AL157911.1
2.43445	5.07478	0.00982606	ENSG00000289524
2.83717	5.07265	0.0164062	ENSG00000270829	AC015849.2
3.17638	5.07092	0.00296432	ENSG00000253343	AC114550.2
2.8837	5.04925	0.00869943	ENSG00000251792	RF00019
2.36021	5.03075	0.018514	ENSG00000243944	AC117386.2
2.37967	5.02726	0.0132478	ENSG00000260853	AC109460.2
4.55052	5.02175	0.00120861	ENSG00000178919	FOXE1
2.78882	5.01898	0.0203167	ENSG00000248165	AC110760.1
2.4152	5.00717	0.041957	ENSG00000206881	RNU6-190P
2.25852	5.0045	0.0264072	ENSG00000285737
2.70132	4.98138	0.0386598	ENSG00000285939
4.31356	4.96589	0.00238252	ENSG00000157184	CPT2
3.93789	4.91765	0.00295357	ENSG00000137558	PI15
11.7537	4.90699	7.39436e-05	ENSG00000006625	GGCT
2.34102	4.905	0.0125388	ENSG00000228696	ARL17B
2.1957	4.89938	0.0290073	ENSG00000273759	AL117379.1
2.26283	4.88573	0.0254945	ENSG00000186150	UBL4B
4.40789	4.86538	0.00162373	ENSG00000238003	RPL10P4
2.0838	4.8647	0.0340425	ENSG00000119333	WDR34
3.31274	4.86026	0.0237087	ENSG00000021461	CYP3A43
2.15633	4.8592	0.0385893	ENSG00000271710	NDUFA8P1
1.97824	4.85391	0.0359475	ENSG00000096384	HSP90AB1
2.53063	4.80608	0.0324896	ENSG00000267283	AC005306.1
8.95567	4.80524	8.87919e-05	ENSG00000287769
2.59243	4.80187	0.0217983	ENSG00000136527	TRA2B		15
1.97021	4.7956	0.0315653	ENSG00000289067
2.18212	4.78166	0.0159131	ENSG00000257016	SLC25A39P2
2.261	4.77999	0.0224464	ENSG00000290916
3.18695	4.77807	0.00693267	ENSG00000144837	PLA1A
3.55087	4.77175	0.0263437	ENSG00000232500	AP005273.1
2.30503	4.75165	0.0269476	ENSG00000119508	NR4A3
3.42605	4.73191	0.01594	ENSG00000259144	RANBP20P
1.96238	4.7076	0.0380731	ENSG00000236791	OR2AI1P
4.38633	4.68189	0.00456273	ENSG00000274214	AP005212.2
3.00995	4.67884	0.0221087	ENSG00000290689
2.21349	4.66437	0.0303347	ENSG00000287891
1.87747	4.63514	0.0446828	ENSG00000140987	ZSCAN32
3.9939	4.63452	0.00290634	ENSG00000293560
2.89357	4.62559	0.0110622	ENSG00000197322	C17orf102
3.1455	4.59873	0.00827379	ENSG00000261273	AC138512.1
2.7372	4.58792	0.00935377	ENSG00000231993	EP300-AS1
3.26224	4.58592	0.0241817	ENSG00000281571	AC241585.3
3.71236	4.57697	0.0125718	ENSG00000183060	LYSMD4
2.40753	4.57371	0.0271124	ENSG00000187140	FOXD3
2.2442	4.57347	0.0128791	ENSG00000261765	AC009127.1
2.78442	4.55475	0.00533615	ENSG00000284653	AL357509.1
2.4156	4.54815	0.019442	ENSG00000234608	MAPKAPK5-AS1
2.91853	4.5354	0.0339561	ENSG00000175826	CTDNEP1
4.62896	4.53192	0.00873743	ENSG00000268480	LINC01862
5.20434	4.5253	0.00438581	ENSG00000173918	C1QTNF1
1.80217	4.51942	0.0493543	ENSG00000213244	HIST2H3DP1
1.81086	4.50713	0.0318307	ENSG00000118960	HS1BP3
3.35107	4.50633	0.0157331	ENSG00000085831	TTC39A
2.37729	4.45099	0.0172903	ENSG00000126067	PSMB2
1.84554	4.42262	0.0227592	ENSG00000293064
2.9427	4.41229	0.0257922	ENSG00000182154	MRPL41
1.96859	4.40093	0.045634	ENSG00000229721	AC104115.1
4.13382	4.34923	0.00689115	ENSG00000272745	AC004948.1
1.78653	4.34656	0.0407019	ENSG00000056277	ZNF280C
4.81778	4.31735	0.00718834	ENSG00000287603
2.85006	4.2972	0.0136747	ENSG00000188917	TRMT2B
2.741	4.29696	0.00996428	ENSG00000230967	AL133387.3
3.04451	4.28629	0.0130343	ENSG00000223547	ZNF844
3.29508	4.28391	0.0103968	ENSG00000278456	AC015712.7
2.21431	4.27262	0.02868	ENSG00000288579
2.51344	4.25888	0.0316547	ENSG00000178999	AURKB
6.43826	4.23599	0.00247859	ENSG00000173575	CHD2
7.02238	4.20601	0.00025807	ENSG00000158526	TSR2
3.0373	4.20443	0.01194	ENSG00000250600	ROPN1L-AS1
2.13368	4.18276	0.0401943	ENSG00000287920
2.25245	4.14577	0.0259292	ENSG00000289603
5.66424	4.14496	0.00710537	ENSG00000065970	FOXJ2
2.33837	4.07858	0.043182	ENSG00000289222
2.66841	4.05491	0.025619	ENSG00000261560	AC007216.3
2.59874	4.05048	0.0287789	ENSG00000227009	FUNDC2P4
7.65317	4.0431	0.000228356	ENSG00000243156	MICAL3
5.42369	3.95139	0.00359091	ENSG00000229466	AL731574.1
4.08443	3.92854	0.0221192	ENSG00000236710	AC108448.2
3.35256	3.92291	0.0303283	ENSG00000083307	GRHL2
3.74176	3.92177	0.0184841	ENSG00000171551	ECEL1
2.41452	3.8911	0.0378495	ENSG00000162063	CCNF
2.73722	3.8837	0.0489037	ENSG00000047932	GOPC
3.25224	3.87147	0.0355012	ENSG00000197085	NPSR1-AS1
3.0943	3.87124	0.0157406	ENSG00000227818	AL590408.1
2.71622	3.85632	0.0434007	ENSG00000134748	PRPF38A
4.27567	3.83738	0.0248719	ENSG00000161509	GRIN2C
3.48609	3.81398	0.0197891	ENSG00000165182	CXorf58
2.65207	3.81394	0.0328192	ENSG00000134240	HMGCS2
2.92803	3.80883	0.0405499	ENSG00000276110	AC242988.1
3.3533	3.79853	0.0354271	ENSG00000172000	ZNF556
2.40532	3.74351	0.0331054	ENSG00000224079	AC091729.1
5.98624	3.73911	0.00372967	ENSG00000278376	AP004609.3
2.93561	3.71689	0.0446055	ENSG00000231967	AL135786.1
3.00425	3.68703	0.0333105	ENSG00000226465	AL390198.1
11.0525	3.6781	0.000110994	ENSG00000235257	ITGA9-AS1
3.91367	3.66355	0.0213315	ENSG00000233901	LINC01503
3.73146	3.66162	0.0478686	ENSG00000267248	AC025048.2
4.96149	3.6336	0.0130398	ENSG00000174606	ANGEL2
2.95672	3.62645	0.0499483	ENSG00000291143
5.11041	3.62421	0.011081	ENSG00000064199	SPA17
5.03169	3.62087	0.00997851	ENSG00000105698	USF2
2.59928	3.59788	0.0227561	ENSG00000234303	CLYBL-AS1
3.09417	3.59438	0.0399601	ENSG00000273350	AC004832.5
4.93853	3.59022	0.0109694	ENSG00000099995	SF3A1
4.08337	3.56876	0.0395688	ENSG00000293213
2.87611	3.55937	0.0392613	ENSG00000227120	AC009238.1
2.67912	3.55596	0.0454027	ENSG00000008405	CRY1
8.6125	3.46684	0.00198432	ENSG00000241738	ZNF90P1
6.61454	3.43011	0.030622	ENSG00000136695	IL36RN
2.65289	3.42388	0.0467764	ENSG00000290055
8.21819	3.42285	0.00244058	ENSG00000129422	MTUS1
3.70005	3.39716	0.0401737	ENSG00000133063	CHIT1
3.78119	3.38138	0.0488852	ENSG00000214851	LINC00612
2.83492	3.37931	0.0395227	ENSG00000266613	RFWD2P1
5.52851	3.35561	0.0131058	ENSG00000165879	FRAT1
7.27996	3.35447	0.011035	ENSG00000086848	ALG9
3.62553	3.33129	0.041065	ENSG00000182118	FAM89A
6.00946	3.32626	0.00269159	ENSG00000227625	AL359510.1
5.64146	3.32261	0.0279138	ENSG00000125910	S1PR4
4.01656	3.31027	0.0234435	ENSG00000143851	PTPN7
4.30477	3.19731	0.0429718	ENSG00000135443	KRT85
3.52056	3.15255	0.0430752	ENSG00000250386	AC233724.10
6.05352	3.14476	0.0185584	ENSG00000214160	ALG3
6.55625	3.12489	0.00447637	ENSG00000274973	BSNDP2
5.0038	3.08326	0.0307061	ENSG00000287876
5.53536	3.07729	0.0203444	ENSG00000268756	AC104534.1
12.2319	3.06508	0.00498864	ENSG00000134760	DSG1
7.56509	3.0538	0.00287623	ENSG00000174450	GOLGA6L2
11.6087	2.91246	0.000781912	ENSG00000250782	AC233724.12
4.33071	2.88316	0.0254062	ENSG00000274447	AC005790.1
5.42011	2.87527	0.0485533	ENSG00000251072	LMNB1-DT
4.78557	2.87469	0.0342066	ENSG00000187862	TTC24
4.32126	2.84811	0.0488674	ENSG00000134215	VAV3
5.76043	2.84802	0.0110331	ENSG00000136271	DDX56
35.7856	2.83883	5.47249e-10	ENSG00000180053	NKX2-6
10.7736	2.78357	0.00847477	ENSG00000233708	AL512353.2
4.5954	2.77097	0.0210424	ENSG00000288093
12.4103	2.75769	0.00133135	ENSG00000174567	GOLT1A
4.75085	2.75508	0.0432895	ENSG00000178971	CTC1
3.98341	2.72841	0.0471658	ENSG00000249131	PSD2-AS1
11.8406	2.72358	0.00138377	ENSG00000058063	ATP11B
6.24597	2.71011	0.0335789	ENSG00000269825	AC022150.4
8.50289	2.68118	0.00617738	ENSG00000281005	LINC00921
10.7734	2.65112	0.011118	ENSG00000264217	RPL35AP25
11.0227	2.63814	0.0198509	ENSG00000107518	ATRNL1
6.07055	2.63385	0.0123234	ENSG00000233974	AC138951.1
3.57703	2.6253	0.0442855	ENSG00000244355	LY6G6D
345.018	2.60936	6.71916e-42	ENSG00000149636	DSN1
9.40894	2.48191	0.014059	ENSG00000143401	ANP32E
7.52306	2.47318	0.0115423	ENSG00000104643	MTMR9
20.2482	2.45168	5.49078e-05	ENSG00000257918	AC079385.3
5.21793	2.44802	0.0361179	ENSG00000285879
8.3267	2.43868	0.0132055	ENSG00000230131	AL160290.2
13.2213	2.43597	0.00104216	ENSG00000083642	PDS5B
5.38633	2.39671	0.0446765	ENSG00000069482	GAL
7.69081	2.38227	0.0358307	ENSG00000119509	INVS
6.80804	2.37241	0.0285727	ENSG00000207013	RNU6-804P
6.75984	2.36648	0.0235455	ENSG00000282277	CYP3A51P
15.6275	2.35525	0.00144466	ENSG00000145949	MYLK4
8.27221	2.3488	0.00575798	ENSG00000163947	ARHGEF3
6.12405	2.32591	0.0421426	ENSG00000274799	RF00017
4.5031	2.28499	0.0359233	ENSG00000223946	AL513008.1
12.0707	2.26648	0.0177081	ENSG00000161544	CYGB
7.50315	2.25056	0.0273901	ENSG00000284605	AC127526.3
8.04346	2.23573	0.0264315	ENSG00000213416	KRTAP4-12
6.23273	2.23088	0.0490143	ENSG00000137674	MMP20
205.741	2.23025	1.70019e-32	ENSG00000149639	SOGA1
10.5473	2.21181	0.0158449	ENSG00000278657	AC245452.5
6.88401	2.21029	0.0385594	ENSG00000293332
12.7935	2.20348	0.0045473	ENSG00000255142	AP006621.2
6.62004	2.18242	0.034035	ENSG00000135632	SMYD5
14.202	2.1804	0.0077332	ENSG00000279865	AC006511.3
10.4275	2.16288	0.0113051	ENSG00000211911	IGHD3-22
6.28153	2.15884	0.0491569	ENSG00000270402	AC011458.1
12.4611	2.15531	0.00809721	ENSG00000291338
6.04215	2.1502	0.0365569	ENSG00000289419
7.34733	2.13707	0.0378236	ENSG00000112116	IL17F
13.9987	2.13418	0.00888048	ENSG00000214145	LINC00887
6.41347	2.131	0.0463546	ENSG00000130711	PRDM12
8.41335	2.12277	0.0222903	ENSG00000162676	GFI1
7.43249	2.10395	0.0458484	ENSG00000233214	AC002511.2
53.3411	2.07291	3.53934e-07	ENSG00000139921	TMX1
9.30048	2.06434	0.0290975	ENSG00000227189	AC092535.1
8.51126	2.06369	0.0360461	ENSG00000088002	SULT2B1
22.3906	2.03829	0.00460422	ENSG00000093217	XYLB
8.5258	2.03357	0.0210484	ENSG00000094880	CDC23
6.93337	2.03131	0.0479186	ENSG00000001460	STPG1
9.13788	2.02495	0.0484891	ENSG00000169682	SPNS1
8.07138	2.01866	0.0387312	ENSG00000257634	AC079310.1
7.31767	2.01421	0.0312959	ENSG00000180913	OR56B3P
10.1458	2.00819	0.0146532	ENSG00000142871	CYR61
7.53373	2.00196	0.034881	ENSG00000184937	WT1
16.0506	1.99424	0.0130849	ENSG00000232907	DLGAP4-AS1
14.5925	1.99088	0.0498584	ENSG00000269466	H3.Y
15.1791	1.98462	0.0118334	ENSG00000196696	AC009022.1
17.0255	1.9824	0.0195755	ENSG00000231636	AGBL5-AS1
51.6075	1.97979	5.06524e-09	ENSG00000167208	SNX20
16.6722	1.97444	0.0175981	ENSG00000137700	SLC37A4
10.9532	1.95774	0.0296525	ENSG00000275714	HIST1H3A
9.29125	1.95671	0.0400769	ENSG00000123178	SPRYD7
28.975	1.91622	0.00292634	ENSG00000108468	CBX1
25.7543	1.91101	0.0024745	ENSG00000139197	PEX5
11.5583	1.90233	0.0126749	ENSG00000019549	SNAI2
9.27825	1.90076	0.0169882	ENSG00000282988	AL031777.3
13.5346	1.89896	0.00691794	ENSG00000132763	MMACHC
25.2978	1.86353	0.000315485	ENSG00000215131	C16orf90
16.5704	1.85147	0.0268886	ENSG00000143995	MEIS1
9.75379	1.84888	0.0212211	ENSG00000283294	AP005212.4
14.8817	1.84524	0.0192	ENSG00000108561	C1QBP
9.42943	1.83687	0.0335565	ENSG00000222205	RNA5SP266
12.3972	1.80391	0.0283287	ENSG00000068366	ACSL4
29.4431	1.80034	0.00435815	ENSG00000268926	AL354861.3
11.0047	1.77633	0.0383265	ENSG00000179008	C14orf39
53.0767	1.77565	3.5654e-06	ENSG00000184566	AC132216.1
61.891	1.76236	8.11495e-05	ENSG00000223824	AC019178.2
61.7131	1.75019	1.14465e-05	ENSG00000260249	AC007608.3
14.2927	1.74707	0.0126549	ENSG00000204278	TMEM235
9.58033	1.7355	0.0385908	ENSG00000163705	FANCD2OS
15.3404	1.72994	0.00987297	ENSG00000258135	LINC02396
17.1142	1.72037	0.0313776	ENSG00000174697	LEP
8.90915	1.71274	0.042142	ENSG00000234982	AL441963.1
12.4798	1.70326	0.0311245	ENSG00000092931	MFSD11
14.1309	1.7024	0.0167631	ENSG00000042753	AP2S1
20.469	1.67988	0.00631685	ENSG00000169026	SLC49A3
24.3633	1.64893	0.00157428	ENSG00000089847	ANKRD24
15.6567	1.62662	0.00918539	ENSG00000198515	CNGA1
20.056	1.62397	0.0210255	ENSG00000232282	MTND1P32
7.85311	1.61542	0.0421494	ENSG00000230826	AL390774.2
9.63093	1.60847	0.0356366	ENSG00000171223	JUNB
38.9828	1.60028	0.00121786	ENSG00000241057	AC004951.3
104.342	1.58578	8.6336e-06	ENSG00000064933	PMS1
20.0696	1.58235	0.00358349	ENSG00000219545	UMAD1
444.029	1.58113	9.09669e-35	ENSG00000158270	COLEC12
30.4033	1.57904	0.00107307	ENSG00000233003	CICP26
22.1155	1.56567	0.00271288	ENSG00000254279	IGHVII-1-1
25.0385	1.55919	0.00544999	ENSG00000149115	TNKS1BP1
12.5429	1.53461	0.0258434	ENSG00000126226	PCID2
19.5578	1.5328	0.0328468	ENSG00000283236	AC074141.1
226.357	1.52962	3.66167e-13	ENSG00000173826	KCNH6
12.0228	1.52653	0.0227724	ENSG00000158636	EMSY
19.4993	1.5116	0.0486215	ENSG00000160867	FGFR4
69.425	1.50497	7.66298e-05	ENSG00000118523	CTGF
21.1632	1.50487	0.0194332	ENSG00000155833	CYLC2
19.7832	-1.52819	0.00387437	ENSG00000146072	TNFRSF21
11.8312	-1.5459	0.0240421	ENSG00000197454	OR2L5
30.3674	-1.55574	0.00849688	ENSG00000272219	AC005072.1
15.2289	-1.55895	0.0493618	ENSG00000215409	AL355493.1
12.4193	-1.5609	0.00998391	ENSG00000291157
31.565	-1.5663	0.0134827	ENSG00000113389	NPR3
18.7692	-1.57606	0.00730653	ENSG00000261564	AC120498.7
12.7221	-1.58342	0.0390321	ENSG00000266370	MIR3657
126.611	-1.588	5.0753e-08	ENSG00000008516	MMP25
18.7814	-1.59684	0.0126629	ENSG00000233041	PHGR1
18.8801	-1.59707	0.0141389	ENSG00000119048	UBE2B
23.3495	-1.60138	0.020576	ENSG00000162714	ZNF496
10.3937	-1.61883	0.0375724	ENSG00000248114	AC114812.3
25.3257	-1.62801	0.00571164	ENSG00000261103	AC009063.3
16.4133	-1.63945	0.016671	ENSG00000255929	AP000943.3
14.716	-1.66048	0.0347312	ENSG00000225697	SLC26A6
27.792	-1.66251	0.00464988	ENSG00000153790	C7orf31
13.382	-1.67367	0.0450933	ENSG00000267490	AC008759.1
18.4194	-1.67882	0.0165898	ENSG00000279486	OR2AG1
29.2549	-1.68032	0.00237193	ENSG00000033122	LRRC7
23.7514	-1.68471	0.00220992	ENSG00000048392	RRM2B
9.68003	-1.6924	0.0455526	ENSG00000228488	AC092168.1
11.1279	-1.69257	0.0459626	ENSG00000113721	PDGFRB
20.6521	-1.69509	0.0168455	ENSG00000053254	FOXN3
8.32583	-1.727	0.0264273	ENSG00000196472	AC111000.1
13.3616	-1.75481	0.00650525	ENSG00000160710	ADAR
12.9875	-1.76466	0.015735	ENSG00000053501	USE1
8.94732	-1.78932	0.0481759	ENSG00000165972	CCDC38
10.4339	-1.79804	0.048698	ENSG00000223810	KRT8P28
10.78	-1.80207	0.0353591	ENSG00000088833	NSFL1C
8.83788	-1.81769	0.0155724	ENSG00000213023	SYT3
13.2601	-1.81816	0.0413852	ENSG00000172461	FUT9
14.5583	-1.84404	0.00685578	ENSG00000215386	MIR99AHG
8.48707	-1.84652	0.0465128	ENSG00000120519	SLC10A7
15.2118	-1.8532	0.0185395	ENSG00000198783	ZNF830
12.8071	-1.85975	0.0181476	ENSG00000287185
12.4909	-1.88899	0.00694387	ENSG00000279600	AC015804.1
20.5925	-1.8918	0.00551095	ENSG00000257954	AC125611.2
8.85887	-1.89798	0.0257677	ENSG00000257884	AL512310.7
10.0826	-1.91681	0.0488821	ENSG00000160223	ICOSLG
25.7456	-1.91847	0.0048475	ENSG00000232090	AC016724.1
16.9849	-1.92025	0.00392149	ENSG00000072657	TRHDE
37.4035	-1.92334	0.00223558	ENSG00000152527	PLEKHH2
10.5519	-1.93484	0.0373105	ENSG00000136531	SCN2A
14.4627	-1.97486	0.0167515	ENSG00000255216	AP001360.2
24.5521	-1.98264	0.00427656	ENSG00000213148	AC073465.1
9.92883	-1.98515	0.0163831	ENSG00000154143	PANX3
9.20706	-1.99058	0.037319	ENSG00000106399	RPA3
18.81	-1.99324	0.000342354	ENSG00000266969	AP002449.1
11.2121	-2.01156	0.0266443	ENSG00000149124	GLYAT
14.0862	-2.05126	0.00600421	ENSG00000103275	UBE2I
10.3589	-2.05636	0.00824446	ENSG00000003400	CASP10
6.5215	-2.07316	0.0342877	ENSG00000185345	PRKN
15.0106	-2.07841	0.0125219	ENSG00000232284	GNG12-AS1
8.00959	-2.08624	0.0102991	ENSG00000255237	AC138230.1
14.5793	-2.11056	0.00682725	ENSG00000138587	MNS1
10.5077	-2.11675	0.0312373	ENSG00000138964	PARVG
41.6806	-2.12634	3.39012e-05	ENSG00000164742	ADCY1
25.7131	-2.13033	9.9492e-05	ENSG00000156509	FBXO43
8.38495	-2.15822	0.0157739	ENSG00000278999	AC008985.1
10.9901	-2.16367	0.00661641	ENSG00000253406	AC012613.2
7.14717	-2.17851	0.0275288	ENSG00000260236	AC099778.1
7.45537	-2.19139	0.0174142	ENSG00000177599	ZNF491
7.79476	-2.19957	0.0207286	ENSG00000163900	TMEM41A
7.95375	-2.20428	0.0117872	ENSG00000169071	ROR2
9.68943	-2.20807	0.0208699	ENSG00000278543	AC010332.2
7.73369	-2.21094	0.0205951	ENSG00000116793	PHTF1
12.2607	-2.21256	0.00437888	ENSG00000187097	ENTPD5
7.29444	-2.21512	0.0450963	ENSG00000170525	PFKFB3
7.0165	-2.22692	0.0466339	ENSG00000285822
8.85514	-2.24353	0.0151199	ENSG00000260476	AC104794.3
6.11541	-2.24581	0.02897	ENSG00000134193	REG4
34.1029	-2.30564	2.32765e-07	ENSG00000214029	ZNF891
6.15487	-2.31572	0.0457802	ENSG00000088682	COQ9
7.60993	-2.32094	0.0311245	ENSG00000234050	Z95624.1
10.355	-2.3339	0.0195558	ENSG00000201182	RNU6-670P
6.77494	-2.3355	0.0448108	ENSG00000122735	DNAI1
7.51387	-2.33798	0.0229389	ENSG00000293222
6.56495	-2.34634	0.0205674	ENSG00000172086	KRCC1
6.28201	-2.34921	0.0379647	ENSG00000222011	FAM185A
4.76911	-2.35946	0.0339935	ENSG00000170037	CNTROB
9.52766	-2.36558	0.0219597	ENSG00000162944	RFTN2
10.2896	-2.37058	0.006174	ENSG00000143321	HDGF
8.20334	-2.37963	0.0126252	ENSG00000101972	STAG2
6.52769	-2.39456	0.0322035	ENSG00000293426
6.61438	-2.4112	0.0219814	ENSG00000183287	CCBE1
8.21679	-2.41179	0.00974438	ENSG00000253731	PCDHGA6
8.01185	-2.41894	0.0324754	ENSG00000156508	EEF1A1
4.83738	-2.42822	0.0460503	ENSG00000280383	Z95331.1
5.6908	-2.43492	0.0291041	ENSG00000270038	AL133467.4
18.681	-2.44417	0.00319469	ENSG00000120063	GNA13
6.27389	-2.45445	0.0137591	ENSG00000279075	AC091965.5
6.69728	-2.46801	0.0312637	ENSG00000180152	XIAPP3
8.57575	-2.48135	0.0222128	ENSG00000205856	C22orf42
8.39249	-2.48469	0.0178229	ENSG00000225643	AL606491.1
7.97884	-2.485	0.0230525	ENSG00000249343	LINC01333
9.78967	-2.49347	0.0216779	ENSG00000257108	NHLRC4
9.07067	-2.49417	0.00700398	ENSG00000132563	REEP2
5.21904	-2.50604	0.0327023	ENSG00000293274
3.82766	-2.52821	0.0416019	ENSG00000231419	LINC00689
4.88582	-2.54199	0.0460714	ENSG00000159335	PTMS
8.34843	-2.54343	0.0109249	ENSG00000168310	IRF2
9.54571	-2.54752	0.0148305	ENSG00000165533	TTC8
5.85801	-2.548	0.0117989	ENSG00000280296	AL137058.3
7.05328	-2.55051	0.0331828	ENSG00000289074
4.51961	-2.5509	0.0421805	ENSG00000005249	PRKAR2B
7.28042	-2.56412	0.0186667	ENSG00000265689	AC024614.2
11.9072	-2.5754	0.0063834	ENSG00000287608
6.9529	-2.59811	0.0167696	ENSG00000256378	AC008011.1
7.54134	-2.62474	0.0245831	ENSG00000248100	AC087257.1
4.57625	-2.6258	0.0237107	ENSG00000288963
7.65545	-2.64742	0.00301657	ENSG00000286259
4.49697	-2.65629	0.0238335	ENSG00000166268	MYRFL
6.60608	-2.65683	0.032591	ENSG00000072415	MPP5
5.66263	-2.66332	0.034698	ENSG00000270623	SPCS2P2
3.8888	-2.66755	0.0415923	ENSG00000000971	CFH
5.44306	-2.68059	0.0362765	ENSG00000236356	AC079584.1
4.82545	-2.69638	0.0376537	ENSG00000084674	APOB
4.42203	-2.70714	0.0341337	ENSG00000219188	CACYBPP3
6.79377	-2.7133	0.00562018	ENSG00000240065	PSMB9
5.2288	-2.71485	0.0274507	ENSG00000106052	TAX1BP1
9.93834	-2.73151	0.00489715	ENSG00000146216	TTBK1
12.0174	-2.73278	0.00106428	ENSG00000181333	HEPHL1
3.7526	-2.7329	0.0470069	ENSG00000165724	ZMYND19
5.81878	-2.73764	0.0386015	ENSG00000167566	NCKAP5L
6.20959	-2.74822	0.0361175	ENSG00000163297	ANTXR2
12.4272	-2.76311	0.0120827	ENSG00000148516	ZEB1
7.68997	-2.80379	0.0123264	ENSG00000184752	NDUFA12
20.4844	-2.80907	0.00402238	ENSG00000261824	LINC00662
10.7418	-2.81391	0.00303729	ENSG00000182816	KRTAP13-2
5.13446	-2.82483	0.0465379	ENSG00000104413	ESRP1
9.72071	-2.86186	0.00467955	ENSG00000258196	AL163973.3
7.23121	-2.87274	0.0387691	ENSG00000116299	KIAA1324
4.05428	-2.87367	0.0454194	ENSG00000186510	CLCNKA
4.42156	-2.87378	0.0275527	ENSG00000266973	AC092296.1
5.58861	-2.88082	0.00803636	ENSG00000103429	BFAR
5.72585	-2.89686	0.0168389	ENSG00000160345	C9orf116
6.57153	-2.89966	0.0266698	ENSG00000249199	AC026785.3
4.78392	-2.90226	0.0169765	ENSG00000204961	PCDHA9
5.73704	-2.90675	0.0263741	ENSG00000116771	AGMAT
8.12448	-2.92975	0.0452169	ENSG00000006634	DBF4
7.36691	-2.93098	0.0015533	ENSG00000171094	ALK
4.41256	-2.93801	0.0337524	ENSG00000227158	AC073621.1
3.80868	-2.94188	0.0495266	ENSG00000160255	ITGB2
8.66518	-2.94976	0.0161359	ENSG00000233395	LINC00841
5.25815	-2.95154	0.021348	ENSG00000167549	CORO6
5.81823	-2.95838	0.0330815	ENSG00000269335	IKBKG
4.46556	-2.95838	0.0466116	ENSG00000166947	EPB42
7.33579	-2.96578	0.00859006	ENSG00000291177
5.22892	-2.96769	0.0145984	ENSG00000228242	AC093495.1
8.09639	-2.97039	0.00124161	ENSG00000263278	AC233701.1
10.3016	-2.98762	0.00911785	ENSG00000139865	TTC6
4.15161	-2.99139	0.0230761	ENSG00000132164	SLC6A11
3.12697	-3.00743	0.045091	ENSG00000113889	KNG1
5.33018	-3.01118	0.0346228	ENSG00000167889	MGAT5B
3.49148	-3.012	0.047588	ENSG00000249207	AC079921.1
5.79215	-3.02637	0.014378	ENSG00000279987	AC008103.1
10.6663	-3.03091	0.000461132	ENSG00000160062	ZBTB8A
4.40773	-3.03244	0.0268395	ENSG00000252130	RNU6-1045P
3.85402	-3.03849	0.0478363	ENSG00000231956	HNRNPA1P9
6.0804	-3.06642	0.00535466	ENSG00000250317	SMIM20
3.78323	-3.07201	0.0324409	ENSG00000143126	CELSR2
5.81763	-3.07773	0.00750077	ENSG00000270806	C17orf50
4.38054	-3.08764	0.0373728	ENSG00000136720	HS6ST1
4.81444	-3.09288	0.0412869	ENSG00000228590	AC007381.1
3.92658	-3.09469	0.0439999	ENSG00000257052	AP003721.4
3.56334	-3.11034	0.0361728	ENSG00000284711	AC010325.3
6.49988	-3.11234	0.00696562	ENSG00000256709	AL133271.1
6.73173	-3.12251	0.019531	ENSG00000140443	IGF1R
5.06285	-3.13909	0.00859772	ENSG00000217268	TXNP7
5.77966	-3.15342	0.0172045	ENSG00000138759	FRAS1
5.50645	-3.15357	0.00399384	ENSG00000167895	TMC8
5.73419	-3.1594	0.0254882	ENSG00000137513	NARS2
5.87008	-3.18346	0.00837618	ENSG00000169418	NPR1
3.22537	-3.21548	0.0374797	ENSG00000239642	MEIKIN
3.88124	-3.22114	0.0248413	ENSG00000162591	MEGF6
11.3061	-3.23026	0.000151266	ENSG00000237539	AC003669.1
4.29617	-3.23703	0.0491451	ENSG00000107854	TNKS2
5.16639	-3.24889	0.0247758	ENSG00000145321	GC
5.32433	-3.2571	0.0204192	ENSG00000235724	AC009299.3
4.4808	-3.28155	0.0126534	ENSG00000177627	C12orf54
6.68687	-3.29661	0.00283589	ENSG00000211928	IGHD5-5
2.90793	-3.30703	0.0378609	ENSG00000230061	TRPM2-AS
7.02519	-3.32305	0.00216285	ENSG00000158604	TMED4
6.39138	-3.34991	0.00325541	ENSG00000237864	LINC00322
5.58516	-3.35437	0.0167826	ENSG00000136709	WDR33
3.91614	-3.36551	0.0280321	ENSG00000160949	TONSL
7.21903	-3.36834	0.0183399	ENSG00000132837	DMGDH
3.75536	-3.38384	0.0357102	ENSG00000276768	AL121890.2
7.52236	-3.40237	0.00628477	ENSG00000075035	WSCD2
11.4237	-3.40518	0.0012884	ENSG00000293346
3.57685	-3.41105	0.0270166	ENSG00000104343	UBE2W
2.93304	-3.41902	0.02982	ENSG00000156110	ADK
4.67465	-3.42048	0.0213962	ENSG00000227538	HNRNPFP1
7.21675	-3.43483	0.00321381	ENSG00000152270	PDE3B
2.83093	-3.44208	0.0422185	ENSG00000163468	CCT3
2.62505	-3.45783	0.0466811	ENSG00000260403	AC120498.3
7.80811	-3.46766	0.00542816	ENSG00000089177	KIF16B
4.88236	-3.47111	0.0220274	ENSG00000257176	AC009318.1
5.74535	-3.473	0.0260776	ENSG00000251372	LINC00499
2.85012	-3.47463	0.0412261	ENSG00000199032	MIR425
3.39189	-3.4851	0.0381659	ENSG00000163516	ANKZF1
4.41051	-3.48707	0.0274635	ENSG00000266916	ZNF793-AS1
5.52772	-3.5142	0.00999174	ENSG00000261594	TPBGL
2.64545	-3.52009	0.0278375	ENSG00000244411	KRTAP5-7
2.35829	-3.52402	0.0425688	ENSG00000013392	RWDD2A
1.97952	-3.56842	0.0409119	ENSG00000064995	TAF11
4.23904	-3.58783	0.0163754	ENSG00000248809	LINC01095
2.32326	-3.59228	0.0461377	ENSG00000139174	PRICKLE1
4.70402	-3.63903	0.0115878	ENSG00000232825	AL445433.2
3.94083	-3.65011	0.0223956	ENSG00000271911	AL357054.3
4.34859	-3.69241	0.0289386	ENSG00000187736	NHEJ1
2.70261	-3.71183	0.0488676	ENSG00000127418	FGFRL1
4.26848	-3.71788	0.0127838	ENSG00000188747	NOXA1
2.06344	-3.71836	0.033872	ENSG00000189241	TSPYL1
4.26538	-3.72068	0.0186918	ENSG00000292385
2.74794	-3.72925	0.0463581	ENSG00000132646	PCNA
3.58664	-3.74168	0.0224712	ENSG00000225636	HNRNPA3P15
3.01185	-3.77105	0.0451503	ENSG00000182010	RTKN2
3.44848	-3.77168	0.0226623	ENSG00000236936	AL031005.1
3.86935	-3.80015	0.00633235	ENSG00000007933	FMO3
6.26215	-3.80289	0.00499948	ENSG00000114013	CD86
5.40771	-3.80458	0.0016988	ENSG00000011083	SLC6A7
2.83092	-3.80753	0.0231897	ENSG00000163283	ALPP
3.36042	-3.83046	0.0491084	ENSG00000119280	C1orf198
2.65811	-3.83073	0.0436829	ENSG00000237126	AC073254.1
2.56653	-3.83163	0.0331658	ENSG00000119660	DPPA5P4
2.89294	-3.8571	0.0396416	ENSG00000213293	AC012618.1
3.63555	-3.87221	0.0356726	ENSG00000259635	AC100830.1
1.94653	-3.87568	0.0352671	ENSG00000122435	TRMT13
3.89623	-3.87897	0.00797406	ENSG00000109063	MYH3
4.11155	-3.88582	0.0178151	ENSG00000251525	TCP11X3P
6.53468	-3.88894	0.00384285	ENSG00000272491	AL109659.2
2.34718	-3.89814	0.0405573	ENSG00000273552	AL136439.1
3.60822	-3.90013	0.018242	ENSG00000248827	AC024587.1
3.01784	-3.90906	0.0360626	ENSG00000278192	AL118505.1
5.34753	-3.93615	0.00325519	ENSG00000137656	BUD13
3.33601	-3.93774	0.0350416	ENSG00000013561	RNF14
1.99437	-3.93875	0.044803	ENSG00000225082	DAP3P1
3.26735	-3.93904	0.0257257	ENSG00000287035
2.49053	-3.93969	0.0123168	ENSG00000135736	CCDC102A
2.55829	-3.94745	0.0189352	ENSG00000224273	AC005077.2
2.06841	-3.94849	0.0489119	ENSG00000267376	ATP5MGP6
7.02397	-3.95998	0.000132332	ENSG00000171314	PGAM1
4.36828	-3.96315	0.012478	ENSG00000230343	AC018892.1
2.95112	-3.96563	0.0494808	ENSG00000111788	AC009533.1
2.93726	-3.96618	0.0287555	ENSG00000272031	ANKRD34A
2.23576	-3.97601	0.0459419	ENSG00000163288	GABRB1
2.09554	-3.97954	0.0388197	ENSG00000230280	HNRNPA1P59
2.17546	-3.98791	0.0299428	ENSG00000104660	LEPROTL1
3.68908	-3.98833	0.0156976	ENSG00000159723	AGRP
4.74284	-3.99257	0.00404628	ENSG00000212620	RF00072
3.16634	-4.00666	0.0312416	ENSG00000198055	GRK6
2.91032	-4.00776	0.0218923	ENSG00000172264	MACROD2
3.37185	-4.00938	0.0299304	ENSG00000184811	TUSC5
3.39878	-4.01875	0.0438597	ENSG00000144283	PKP4
3.13887	-4.02912	0.0240494	ENSG00000196187	TMEM63A
1.99409	-4.03274	0.0442389	ENSG00000059915	PSD
2.37344	-4.03569	0.026491	ENSG00000221345	RF00012
3.88205	-4.04533	0.0264912	ENSG00000076685	NT5C2
3.56259	-4.05244	0.0157492	ENSG00000158769	F11R
3.34354	-4.06989	0.021919	ENSG00000115129	TP53I3
3.33652	-4.07796	0.0429968	ENSG00000168878	SFTPB
3.37426	-4.07901	0.0262368	ENSG00000165934	CPSF2
3.05562	-4.08848	0.0150543	ENSG00000187753	C9orf153
3.502	-4.10296	0.0410034	ENSG00000178732	GP5
3.26695	-4.10305	0.0417799	ENSG00000286071
2.55205	-4.10482	0.0362079	ENSG00000196323	ZBTB44
2.32045	-4.10581	0.0331656	ENSG00000119655	NPC2
3.70204	-4.1115	0.0105189	ENSG00000228049	POLR2J2
4.48785	-4.12076	0.00460725	ENSG00000082146	STRADB
3.55401	-4.12322	0.0205919	ENSG00000250476	ENPP7P9
3.72117	-4.12893	0.0227789	ENSG00000137809	ITGA11
2.43184	-4.13895	0.0329404	ENSG00000259459	LINC02568
2.02969	-4.14054	0.0352794	ENSG00000132204	LINC00470
3.55268	-4.16385	0.0153527	ENSG00000239953	RN7SL273P
6.34149	-4.18413	0.00563044	ENSG00000286195
3.25973	-4.18414	0.0129407	ENSG00000124089	MC3R
2.64678	-4.18524	0.0351541	ENSG00000227888	FAM66A
2.32143	-4.19286	0.035994	ENSG00000180424	DEFB123
1.93352	-4.1964	0.0313642	ENSG00000285756
1.7079	-4.21714	0.0395391	ENSG00000079931	MOXD1
2.57844	-4.23275	0.0194642	ENSG00000277493	AC139769.3
3.51236	-4.23286	0.0237673	ENSG00000137727	ARHGAP20
2.52301	-4.23461	0.0355425	ENSG00000157884	CIB4
3.51916	-4.27357	0.0222368	ENSG00000104205	SGK3
1.54788	-4.27697	0.0484009	ENSG00000068001	HYAL2
1.86793	-4.27922	0.043512	ENSG00000130810	PPAN
4.29566	-4.28001	0.0134973	ENSG00000187595	ZNF385C
2.09261	-4.31291	0.0394543	ENSG00000289059
1.87916	-4.32218	0.0340317	ENSG00000286782
2.7259	-4.32537	0.0288517	ENSG00000259188	AC025040.1
3.03075	-4.33377	0.00983332	ENSG00000143748	NVL
2.07329	-4.33442	0.0370412	ENSG00000265763	ZNF488
2.56343	-4.33569	0.0126867	ENSG00000130347	RTN4IP1
3.68739	-4.34433	0.0430354	ENSG00000178295	GEN1
2.98077	-4.34615	0.0205902	ENSG00000244743	AC087588.1
5.00365	-4.35116	0.00282773	ENSG00000040633	PHF23
1.70571	-4.35119	0.0320653	ENSG00000286083
3.52152	-4.36109	0.0136774	ENSG00000151882	CCL28
1.61519	-4.36142	0.0420446	ENSG00000235290	HLA-W
2.63402	-4.36248	0.0235587	ENSG00000238619	RNU6-775P
2.95395	-4.38682	0.0131677	ENSG00000155966	AFF2
1.93904	-4.39916	0.0436115	ENSG00000286257
4.87224	-4.41841	0.003065	ENSG00000230645	LINC01818
2.48279	-4.45791	0.00924029	ENSG00000272688	AP005329.3
2.2488	-4.46188	0.0168549	ENSG00000165168	CYBB
3.87317	-4.47348	0.0109619	ENSG00000258122	AC044802.2
5.56484	-4.48133	0.00287349	ENSG00000275432	AC022149.1
1.68749	-4.49055	0.0360202	ENSG00000205863	C1QTNF9B
2.32974	-4.49229	0.0294444	ENSG00000179630	LACC1
1.83212	-4.51174	0.0417737	ENSG00000222337	RN7SKP225
1.8271	-4.51378	0.0178371	ENSG00000278770	RF00017
3.1449	-4.51566	0.00711236	ENSG00000161912	ADCY10P1
2.87594	-4.52685	0.0181109	ENSG00000145685	LHFPL2
3.95007	-4.52801	0.0133548	ENSG00000150782	IL18
1.93421	-4.53289	0.0490332	ENSG00000239246	AC008026.1
2.72547	-4.53514	0.0183569	ENSG00000133424	LARGE1
1.80713	-4.53651	0.0495312	ENSG00000261267	AC026470.2
1.66996	-4.54514	0.0329791	ENSG00000034693	PEX3
2.20299	-4.55208	0.0265864	ENSG00000272485	AL392183.1
2.51504	-4.55384	0.0343301	ENSG00000105856	HBP1
3.30119	-4.55451	0.00473127	ENSG00000138135	CH25H
6.70797	-4.55775	0.00357686	ENSG00000198771	RCSD1
2.54842	-4.56943	0.0385778	ENSG00000279589	AC079416.2
2.49357	-4.57736	0.0465841	ENSG00000231707	PABPC1P1
4.35375	-4.5951	0.00372636	ENSG00000099940	SNAP29
1.66348	-4.60091	0.0441477	ENSG00000163154	TNFAIP8L2
2.68329	-4.60491	0.0152331	ENSG00000242612	DECR2
3.15637	-4.60741	0.0236129	ENSG00000157693	TMEM268
2.72712	-4.6141	0.00994381	ENSG00000120949	TNFRSF8
1.75191	-4.61501	0.0482855	ENSG00000223861	AL365436.1
2.5952	-4.62388	0.0199977	ENSG00000228971	AL356479.1
1.87473	-4.62419	0.030485	ENSG00000143036	SLC44A3
2.25061	-4.63731	0.0116555	ENSG00000279878	AP003108.5
2.6571	-4.64237	0.0176235	ENSG00000136824	SMC2
2.88424	-4.6474	0.0103754	ENSG00000266821	AC018521.7
1.94608	-4.65364	0.0100094	ENSG00000258168	AC025569.1
2.15712	-4.65503	0.0377596	ENSG00000134717	BTF3L4
1.80593	-4.65723	0.0408759	ENSG00000185477	GPRIN3
2.21301	-4.66439	0.0136283	ENSG00000249145	LINC02517
1.80239	-4.66849	0.0482552	ENSG00000155850	SLC26A2
1.95898	-4.67835	0.0265337	ENSG00000182827	ACBD3
5.45701	-4.69483	0.00398768	ENSG00000290660
3.11812	-4.69665	0.00777883	ENSG00000130734	ATG4D
2.72596	-4.71289	0.0175237	ENSG00000142484	TM4SF5
1.88511	-4.71676	0.0344939	ENSG00000243063	IGKV3-7
4.48494	-4.73821	0.00302191	ENSG00000179262	RAD23A
2.84394	-4.7402	0.0168904	ENSG00000196639	HRH1
3.31453	-4.75523	0.0114605	ENSG00000149948	HMGA2
2.86367	-4.75752	0.0275579	ENSG00000156170	NDUFAF6
4.17838	-4.76493	0.00675487	ENSG00000272808	AC015712.6
2.22284	-4.77614	0.0128203	ENSG00000288076
2.38115	-4.77791	0.0350926	ENSG00000139304	PTPRQ
2.21186	-4.77959	0.0484147	ENSG00000027847	B4GALT7
4.99884	-4.79427	0.00265959	ENSG00000168487	BMP1
3.80227	-4.79695	0.013362	ENSG00000163625	WDFY3
2.94669	-4.80603	0.0253385	ENSG00000274588	DGKK
2.62473	-4.8107	0.00811427	ENSG00000165675	ENOX2
2.03954	-4.81394	0.0177805	ENSG00000278467	AC138393.3
2.82284	-4.81431	0.0407889	ENSG00000247809	NR2F2-AS1
2.07656	-4.81967	0.0287597	ENSG00000283000	AL392046.2
7.88729	-4.82748	0.00364784	ENSG00000242808	SOX2-OT
1.98947	-4.83026	0.0494835	ENSG00000125813	PAX1
3.08239	-4.83226	0.00743856	ENSG00000239523	MYLK-AS1
5.15046	-4.83394	0.00647049	ENSG00000189056	RELN
4.32433	-4.83998	0.00256984	ENSG00000062282	DGAT2
3.20858	-4.84428	0.0216183	ENSG00000113645	WWC1
2.26955	-4.84429	0.0286331	ENSG00000225327	USP17L3
1.93468	-4.8475	0.0477905	ENSG00000158865	SLC5A11
2.04598	-4.85788	0.0474888	ENSG00000224725	CEP57L1P1
3.44765	-4.88116	0.0137689	ENSG00000287238
3.48383	-4.89491	0.0100094	ENSG00000105982	RNF32
2.00758	-4.89518	0.0471925	ENSG00000156831	NSMCE2
2.48399	-4.89591	0.00781622	ENSG00000152683	SLC30A6
3.23377	-4.90099	0.0179922	ENSG00000185942	NKAIN3
2.64688	-4.92348	0.00937155	ENSG00000141030	COPS3
3.26263	-4.92872	0.00775209	ENSG00000279859	AC093323.2
2.35889	-4.93371	0.0255702	ENSG00000227630	LINC01132
2.09839	-4.9393	0.0480517	ENSG00000137492	THAP12
3.73704	-4.94251	0.00138755	ENSG00000107625	DDX50
3.36221	-4.94755	0.0120724	ENSG00000161016	RPL8
3.33082	-4.95531	0.00304677	ENSG00000189182	KRT77
3.00684	-4.95677	0.0122526	ENSG00000221910	OR2F2
2.0205	-4.97745	0.0389164	ENSG00000151224	MAT1A
2.31685	-4.97792	0.0374228	ENSG00000250490	LINC02145
2.39105	-4.98437	0.0228115	ENSG00000105732	ZNF574
5.37098	-4.98747	0.00109704	ENSG00000204897	KRT25
1.87983	-4.98786	0.0453197	ENSG00000284465	AC233724.20
2.09212	-4.98916	0.0265925	ENSG00000158042	MRPL17
3.18539	-4.9907	0.0119548	ENSG00000171004	HS6ST2
3.35795	-4.99938	0.00634783	ENSG00000235706	DICER1-AS1
2.27843	-5.00516	0.0237895	ENSG00000165494	PCF11
2.4448	-5.01222	0.0173476	ENSG00000273675	AL118556.2
2.84087	-5.01497	0.017156	ENSG00000183250	LINC01547
1.99079	-5.01585	0.0351792	ENSG00000228564	LINC01005
2.18619	-5.02143	0.0286386	ENSG00000185010	F8
2.32142	-5.02398	0.0201469	ENSG00000277675	AC211486.5
2.76756	-5.02646	0.00376516	ENSG00000079246	XRCC5
2.23642	-5.02839	0.0338264	ENSG00000108179	PPIF
1.93704	-5.03462	0.0456219	ENSG00000237234	Z99289.1
2.49622	-5.04061	0.00569895	ENSG00000248125	AC008700.1
2.42603	-5.04789	0.0174183	ENSG00000250548	LINC01303
3.5587	-5.05782	0.0152881	ENSG00000165219	GAPVD1
3.76824	-5.0636	0.00495313	ENSG00000264635	AP001020.2
1.97609	-5.06672	0.038095	ENSG00000277932	OR52E5
2.14539	-5.06935	0.0391691	ENSG00000213560	AC103591.1
2.07734	-5.07519	0.0465859	ENSG00000225783	MIAT
2.05575	-5.07616	0.0246655	ENSG00000231533	AL078601.2
2.09372	-5.08652	0.0270308	ENSG00000213973	ZNF99
2.42419	-5.09208	0.0115898	ENSG00000236078	LINC01447
2.17197	-5.10354	0.0454541	ENSG00000123219	CENPK
3.83396	-5.10598	0.0131175	ENSG00000271959	AC100803.3
2.4644	-5.11229	0.0211068	ENSG00000169105	CHST14
3.35201	-5.11568	0.00597616	ENSG00000198732	SMOC1
2.12844	-5.12389	0.0278847	ENSG00000143952	VPS54
2.24843	-5.13341	0.0118357	ENSG00000258438	OR11K2P
2.15611	-5.13343	0.0255182	ENSG00000100601	ALKBH1
2.32357	-5.13441	0.0294151	ENSG00000138185	ENTPD1
3.15808	-5.13538	0.0129041	ENSG00000125676	THOC2
3.07867	-5.13566	0.00702469	ENSG00000289134
2.15903	-5.14213	0.0419014	ENSG00000279273	AC120024.4
2.47466	-5.14379	0.0223452	ENSG00000214106	PAXIP1-AS2
2.09292	-5.14482	0.0380305	ENSG00000178804	H1FOO
2.28242	-5.15877	0.0201929	ENSG00000145375	SPATA5
2.36874	-5.16453	0.00988116	ENSG00000187699	C2orf88
2.38654	-5.16624	0.0413576	ENSG00000250634	LINC01182
2.92731	-5.16775	0.00105107	ENSG00000280424	BX537318.2
2.55318	-5.17846	0.00716321	ENSG00000284512	AC092718.8
2.46638	-5.18082	0.0148886	ENSG00000161381	PLXDC1
2.43377	-5.18454	0.0165689	ENSG00000267231	AC005786.2
2.40453	-5.1883	0.0125279	ENSG00000267505	AC005180.2
2.84283	-5.19094	0.0076941	ENSG00000155719	OTOA
2.31308	-5.19317	0.0482566	ENSG00000093000	NUP50
2.70653	-5.19839	0.00346535	ENSG00000120057	SFRP5
2.41473	-5.19842	0.0252518	ENSG00000110851	PRDM4
2.31012	-5.20172	0.0380296	ENSG00000176463	SLCO3A1
3.55017	-5.20512	0.00442751	ENSG00000054356	PTPRN
2.5728	-5.2236	0.00762526	ENSG00000009765	IYD
2.78594	-5.23168	0.0100496	ENSG00000223505	AC114402.1
2.70471	-5.24728	0.00786319	ENSG00000267532	MIR497HG
2.56994	-5.25202	0.0301958	ENSG00000145863	GABRA6
3.82148	-5.2598	0.00487231	ENSG00000100353	EIF3D
2.36254	-5.2639	0.0338584	ENSG00000148180	GSN
2.27972	-5.27303	0.0286373	ENSG00000089009	RPL6
3.26119	-5.27385	0.00439362	ENSG00000227000	HSPD1P14
2.92124	-5.28038	0.00496101	ENSG00000107560	RAB11FIP2
2.30498	-5.28334	0.0265708	ENSG00000141644	MBD1
2.61998	-5.28623	0.0212709	ENSG00000238012	AC114752.1
2.31961	-5.2926	0.0497179	ENSG00000140545	MFGE8
2.32638	-5.29664	0.0480456	ENSG00000293581
2.35455	-5.31515	0.0449326	ENSG00000139915	MDGA2
2.36279	-5.31839	0.0452465	ENSG00000165084	C8orf34
2.53391	-5.32046	0.030808	ENSG00000162231	NXF1
2.73912	-5.32346	0.00558051	ENSG00000261884	AC040162.1
3.27177	-5.32709	0.00657747	ENSG00000236018	AC004898.1
2.77465	-5.32887	0.0107356	ENSG00000273265	CNNM3-DT
2.88793	-5.33628	0.0168527	ENSG00000278462	AL359880.1
2.48775	-5.34423	0.0292723	ENSG00000075884	ARHGAP15
2.40808	-5.35273	0.0433779	ENSG00000166598	HSP90B1
2.41378	-5.35592	0.0216743	ENSG00000197826	C4orf22
2.80362	-5.35967	0.0104495	ENSG00000123095	BHLHE41
2.43627	-5.36435	0.028097	ENSG00000164284	GRPEL2
2.52683	-5.3688	0.0261937	ENSG00000218336	TENM3
2.76356	-5.37051	0.0111379	ENSG00000239099	RNU7-23P
2.87743	-5.38243	0.00742139	ENSG00000180881	CAPS2
2.48141	-5.38618	0.0249973	ENSG00000104447	TRPS1
2.48041	-5.39214	0.0389862	ENSG00000137872	SEMA6D
2.8081	-5.39453	0.00882241	ENSG00000111696	NT5DC3
2.49026	-5.3953	0.0422932	ENSG00000207276	RNU6-1160P
2.6726	-5.40418	0.026518	ENSG00000182196	ARL6IP4
2.6091	-5.41289	0.0242357	ENSG00000147533	GOLGA7
2.54234	-5.42577	0.0377449	ENSG00000125255	SLC10A2
3.07738	-5.42728	0.00566905	ENSG00000271655	BNIP3P35
2.54827	-5.42903	0.0411474	ENSG00000130147	SH3BP4
3.5959	-5.43657	0.00400537	ENSG00000113303	BTNL8
2.57055	-5.44356	0.0352846	ENSG00000151789	ZNF385D
2.61498	-5.46669	0.0411604	ENSG00000168275	COA6
3.02125	-5.46718	0.00490167	ENSG00000109861	CTSC
2.63322	-5.475	0.0334678	ENSG00000181450	ZNF678
2.63414	-5.47695	0.0347084	ENSG00000232903	LINC01166
2.63569	-5.47754	0.0211597	ENSG00000169554	ZEB2
2.63581	-5.47785	0.0362149	ENSG00000011465	DCN
2.72207	-5.48564	0.0205828	ENSG00000078549	ADCYAP1R1
2.94166	-5.51016	0.00875806	ENSG00000247828	TMEM161B-AS1
2.69909	-5.51108	0.031653	ENSG00000049283	EPN3
2.70679	-5.51644	0.0336267	ENSG00000186684	CYP27C1
2.99101	-5.51678	0.0144649	ENSG00000081479	LRP2
2.74985	-5.53972	0.0321062	ENSG00000122335	SERAC1
2.84867	-5.54904	0.0182487	ENSG00000165819	METTL3
4.90134	-5.55061	0.00165395	ENSG00000025039	RRAGD
2.87878	-5.56404	0.0182232	ENSG00000233705	SLC26A4-AS1
3.16444	-5.58462	0.00837991	ENSG00000244625	MIATNB
2.84121	-5.58688	0.00410465	ENSG00000115919	KYNU
2.84196	-5.58914	0.0254264	ENSG00000166984	TCP10L2
3.10806	-5.60473	0.00400574	ENSG00000196141	SPATS2L
2.87267	-5.60524	0.0244381	ENSG00000135144	DTX1
2.87418	-5.60567	0.0107437	ENSG00000139168	ZCRB1
3.05168	-5.61179	0.0102302	ENSG00000165185	KIAA1958
2.93271	-5.62903	0.0241053	ENSG00000107317	PTGDS
3.35001	-5.63191	0.00602797	ENSG00000146285	SCML4
3.38126	-5.64787	0.0033599	ENSG00000078114	NEBL
3.77442	-5.65913	0.000893993	ENSG00000250517	LDHAL6CP
3.59169	-5.71371	0.00929712	ENSG00000183454	GRIN2A
3.57122	-5.7138	0.00688004	ENSG00000126106	TMEM53
5.94824	-5.71951	0.000892639	ENSG00000138757	G3BP2
3.40596	-5.72164	0.0030964	ENSG00000275789	MIR8064
3.31582	-5.74352	0.00353352	ENSG00000286746
3.46891	-5.78418	0.00640943	ENSG00000006576	PHTF2		15
3.37786	-5.80593	0.00356541	ENSG00000018625	ATP1A2
3.69677	-5.84388	0.000202984	ENSG00000228133	AC099684.1
6.17002	-5.90629	0.000684158	ENSG00000102001	CACNA1F
4.22792	-5.93416	0.00128839	ENSG00000103591	AAGAB
3.92947	-5.93465	0.00489784	ENSG00000172869	DMXL1
3.95597	-5.94064	0.000873113	ENSG00000166886	NAB2
3.80429	-5.97732	0.00190795	ENSG00000158008	EXTL1
3.91033	-5.98004	0.00102988	ENSG00000234428	AC023051.1
4.44604	-5.98181	0.000100833	ENSG00000115183	TANC1
4.39691	-6.01722	0.000117199	ENSG00000028203	VEZT
3.92673	-6.02949	0.00228689	ENSG00000167646	DNAAF3
4.45014	-6.15894	0.000543186	ENSG00000049323	LTBP1
4.47136	-6.19469	0.00172218	ENSG00000166619	BLCAP
5.5653	-6.45028	0.0447552	ENSG00000258820	AF111167.1
5.81997	-6.59963	0.00030076	ENSG00000137642	SORL1
6.87976	-6.7914	7.22352e-05	ENSG00000198838	RYR3
13.3835	-7.0583	0.000618124	ENSG00000122966	CIT
11.3196	-7.55071	0.00519163	ENSG00000258120	KRT128P

## Sheet: 16B vs vehicle
baseMean	log2FoldChange	pvalue	Ensembl	Gene Name
19.2407	6.93139	0.00856303	ENSG00000224078	SNHG14
5.41342	6.47822	0.02438	ENSG00000185567	AHNAK2
7.77191	6.12942	0.0191433	ENSG00000155506	LARP1
5.49543	6.05705	0.00112314	ENSG00000215262	KCNU1
3.56023	5.85629	0.00485031	ENSG00000183337	BCOR
2.76775	5.60793	0.0289105	ENSG00000259026	AL049833.2
9.57771	5.5897	0.000946461	ENSG00000133835	HSD17B4
3.53723	5.56288	0.0121381	ENSG00000285632
2.91923	5.54397	0.0125961	ENSG00000231302	RPL36P2
2.5474	5.48788	0.0429245	ENSG00000226622	AC092155.1
2.45867	5.43995	0.0382104	ENSG00000278338	VWA8-AS1
2.45889	5.43774	0.0387787	ENSG00000232448	AL354824.2
2.63957	5.43652	0.0320448	ENSG00000266049	AP001011.1
2.97735	5.43255	0.0274054	ENSG00000115053	NCL
5.01709	5.43157	0.00620139	ENSG00000132286	TIMM10B
4.57242	5.42061	0.00407826	ENSG00000120948	TARDBP
3.41324	5.41911	0.0130737	ENSG00000196730	DAPK1
5.87574	5.3937	0.00120732	ENSG00000175782	SLC35E3
3.79683	5.39309	0.00710646	ENSG00000237400	AC006960.2
7.79319	5.38969	0.00054594	ENSG00000239219	AC008040.1
2.29992	5.34367	0.0457879	ENSG00000259837	LINC01904
2.48794	5.33393	0.0154841	ENSG00000019169	MARCO
2.26747	5.32362	0.0483498	ENSG00000248898	AC022126.1
4.44269	5.30505	0.00734561	ENSG00000196482	ESRRG
2.91094	5.27779	0.0401585	ENSG00000278383	AL031673.1
2.28088	5.26957	0.0423703	ENSG00000112379	ARFGEF3
2.41022	5.219	0.0489234	ENSG00000269190	FBXO17
2.56606	5.21618	0.0130992	ENSG00000188771	PLET1
3.3791	5.20641	0.0067116	ENSG00000090661	CERS4
2.07871	5.1301	0.0485818	ENSG00000235166	LINC01440
3.66244	5.10257	0.010714	ENSG00000117266	CDK18
3.31274	5.07144	0.0182697	ENSG00000021461	CYP3A43
2.44551	5.06646	0.0354629	ENSG00000132950	ZMYM5
5.87276	5.0644	0.00451171	ENSG00000079841	RIMS1
3.14422	5.05959	0.0274142	ENSG00000252128	RF00086
3.22406	5.05659	0.00995523	ENSG00000184995	IFNE
5.03575	5.01449	0.00973405	ENSG00000179583	CIITA
4.08256	5.01256	0.0137582	ENSG00000185686	PRAME
3.85378	5.01224	0.0186029	ENSG00000139618	BRCA2
3.91389	4.94243	0.017881	ENSG00000213614	HEXA
2.85196	4.89507	0.0412011	ENSG00000279695	AL359757.2
4.31699	4.88567	0.0199352	ENSG00000285108	AC103718.1
4.3264	4.88045	0.0045936	ENSG00000182606	TRAK1
2.00849	4.86065	0.0440953	ENSG00000103021	CCDC113
2.79109	4.85795	0.0466611	ENSG00000176040	TMPRSS7
11.7017	4.85204	0.0223538	ENSG00000243643	TSPY20P
3.36225	4.82587	0.0212031	ENSG00000182218	HHIPL1
1.78595	4.82341	0.0475413	ENSG00000253626	EIF5AL1
2.22034	4.82035	0.0489725	ENSG00000170364	SETMAR
2.67424	4.79362	0.0468971	ENSG00000172971	UNC93B3
2.52361	4.77875	0.0468689	ENSG00000255690	TRIL
2.17994	4.77719	0.013483	ENSG00000212935	KRTAP10-3
4.43622	4.77645	0.00490697	ENSG00000224689	ZNF812P
4.31269	4.77369	0.0151977	ENSG00000182771	GRID1
3.72032	4.77343	0.0168055	ENSG00000172725	CORO1B
2.80156	4.76458	0.0339038	ENSG00000228566	AC022387.1
5.85543	4.71465	0.0142714	ENSG00000170873	MTSS1
3.0461	4.70996	0.0407152	ENSG00000109576	AADAT
2.14515	4.68508	0.0393962	ENSG00000075415	SLC25A3
3.01531	4.68335	0.0310252	ENSG00000115415	STAT1
2.53743	4.66314	0.0406787	ENSG00000216560	LINC00955
3.6252	4.65993	0.0220754	ENSG00000291101
2.86442	4.65738	0.0311804	ENSG00000101251	SEL1L2
4.50994	4.65089	0.0128229	ENSG00000235486	AC114755.5
1.74108	4.6051	0.0497519	ENSG00000225137	DYNC1I2P1
4.41291	4.56841	0.00439469	ENSG00000137815	RTF1
4.12408	4.55792	0.00827307	ENSG00000225698	IGHV3-72
4.92699	4.54156	0.0156195	ENSG00000241739	AC010469.2
3.45429	4.53626	0.0452911	ENSG00000104903	LYL1
3.44952	4.52069	0.0368826	ENSG00000239572	AC117513.1
3.64731	4.51986	0.0396438	ENSG00000153253	SCN3A
3.32425	4.49787	0.0373133	ENSG00000288880
2.31957	4.48831	0.020604	ENSG00000260194	AC007496.1
5.64833	4.45507	0.0070324	ENSG00000186204	CYP4F12
3.23366	4.40901	0.0314288	ENSG00000278463	HIST1H2AB
4.31283	4.40678	0.0125927	ENSG00000287864
1.59271	4.39934	0.0441472	ENSG00000135185	TMEM243
2.11762	4.39135	0.0434311	ENSG00000171103	TRMT61B
3.78119	4.38708	0.0165403	ENSG00000214851	LINC00612
3.46157	4.37225	0.029348	ENSG00000070756	PABPC1
2.482	4.34013	0.0345257	ENSG00000167614	TTYH1
3.99758	4.32724	0.036117	ENSG00000136542	GALNT5
3.35719	4.30454	0.0383798	ENSG00000111249	CUX2
7.50534	4.2559	0.0044793	ENSG00000197380	DACT3
2.18596	4.25102	0.028424	ENSG00000278434	AC023830.3
57.7751	4.24547	0.00958764	ENSG00000253314	LINC00293
3.1106	4.24304	0.0375399	ENSG00000236908	AC005865.1
7.97589	4.23993	0.00616661	ENSG00000109794	FAM149A
5.03169	4.20011	0.00395799	ENSG00000105698	USF2
3.36957	4.19964	0.0490088	ENSG00000119771	KLHL29
4.24944	4.17893	0.0308458	ENSG00000048052	HDAC9
3.04664	4.14403	0.00954731	ENSG00000105464	GRIN2D
2.89357	4.13893	0.0223307	ENSG00000197322	C17orf102
3.00995	4.1207	0.0424626	ENSG00000290689
3.5651	4.11433	0.0417423	ENSG00000287390
3.09019	4.08418	0.0334419	ENSG00000152223	EPG5
3.13329	4.07296	0.0326042	ENSG00000140497	SCAMP2
3.7229	4.00231	0.0136532	ENSG00000271394	RF00100
4.0609	3.95937	0.0228542	ENSG00000266605	LONRF2P1
3.52525	3.92545	0.0237164	ENSG00000266944	AC005262.1
3.65815	3.88406	0.0271136	ENSG00000289510
4.60954	3.86048	0.040068	ENSG00000163251	FZD5
4.87257	3.81926	0.0405356	ENSG00000172331	BPGM
4.65416	3.81544	0.0170282	ENSG00000270870	AC004805.2
5.99143	3.80797	0.0204141	ENSG00000182472	CAPN12
3.32689	3.76691	0.026523	ENSG00000196396	PTPN1
3.88948	3.7306	0.022998	ENSG00000199784	RNU6-1287P
2.64227	3.71877	0.04971	ENSG00000200897	RF00284
2.50951	3.63285	0.0450412	ENSG00000213639	PPP1CB
5.05551	3.61185	0.03434	ENSG00000291093
2.76278	3.60872	0.0286255	ENSG00000269001	AC092070.2
4.01952	3.59852	0.0305202	ENSG00000286715
7.01485	3.58603	0.0342517	ENSG00000287860
6.27677	3.58521	0.0295739	ENSG00000198270	TMEM116
4.70278	3.52621	0.0490464	ENSG00000085231	AK6
9.30048	3.51677	0.000583962	ENSG00000227189	AC092535.1
3.5147	3.50336	0.0328337	ENSG00000277459	AP001527.2
6.65232	3.49932	0.00204084	ENSG00000277095	AC242852.2
5.24122	3.48466	0.0188882	ENSG00000148158	SNX30
3.46736	3.46742	0.0465446	ENSG00000173193	PARP14
4.49912	3.45233	0.0358786	ENSG00000244588	RAD21L1
4.23546	3.42549	0.0326567	ENSG00000184371	CSF1
4.57734	3.40504	0.0119673	ENSG00000283615	MIR924
5.07224	3.38868	0.0299683	ENSG00000131068	DEFB118
4.54619	3.35647	0.0321931	ENSG00000231894	WDR95P
6.1681	3.35257	0.0375812	ENSG00000236700	LINC01010
3.63466	3.35121	0.0453739	ENSG00000242435	UPK3BP1
5.90674	3.34687	0.013429	ENSG00000007062	PROM1
7.01465	3.33968	0.00197728	ENSG00000179403	VWA1
7.70117	3.31386	0.0141364	ENSG00000270332	SMC2-AS1
7.96155	3.30094	0.0256892	ENSG00000204929	AC007389.1
4.27156	3.28249	0.0293959	ENSG00000253394	LINC00534
6.28313	3.28159	0.0342882	ENSG00000277618	AL627230.6
7.78587	3.28031	0.00746651	ENSG00000229956	ZRANB2-AS2
5.7941	3.25105	0.0490009	ENSG00000186998	EMID1
8.19969	3.24614	0.00089276	ENSG00000285520
4.96149	3.22752	0.0208471	ENSG00000174606	ANGEL2
4.6407	3.2257	0.0281771	ENSG00000112290	WASF1
7.76581	3.21653	0.00614234	ENSG00000226881	H3F3AP5
12.0936	3.20921	0.00136123	ENSG00000166483	WEE1
6.87266	3.20314	0.00602307	ENSG00000155660	PDIA4
4.13382	3.1734	0.0246345	ENSG00000272745	AC004948.1
3.62176	3.15216	0.0433943	ENSG00000130700	GATA5
3.77054	3.14446	0.0413297	ENSG00000211778	TRAV4
6.75997	3.09308	0.0192537	ENSG00000169876	MUC17
5.86938	3.08514	0.0365415	ENSG00000107745	MICU1
6.01285	3.08509	0.0344532	ENSG00000155252	PI4K2A
5.00765	3.05856	0.0429826	ENSG00000060558	GNA15
9.5971	3.05455	0.00477721	ENSG00000054793	ATP9A
8.12954	3.04726	0.00435379	ENSG00000148429	USP6NL
7.46621	3.0373	0.00706483	ENSG00000233585	AC231533.2
5.55338	3.03696	0.0352639	ENSG00000221510	MIR548O
5.84284	3.01633	0.0323189	ENSG00000221753	MIR1273A
6.07055	2.99082	0.00496117	ENSG00000233974	AC138951.1
38.2412	2.97925	7.99084e-08	ENSG00000135845	PIGC
6.57095	2.95799	0.0387866	ENSG00000168546	GFRA2
4.29435	2.93988	0.0435832	ENSG00000007216	SLC13A2
4.92328	2.91137	0.0338974	ENSG00000150316	CWC15
4.85906	2.90146	0.0304752	ENSG00000266575	BOLA2P1
16.2175	2.8842	0.000154771	ENSG00000286688
7.13993	2.88275	0.0074511	ENSG00000283155	AC116353.4
6.63244	2.87825	0.0168978	ENSG00000261008	LINC01572
5.48128	2.86343	0.0376682	ENSG00000272274	LINC00551
53.2213	2.82531	3.7367e-12	ENSG00000226945	AC098935.1
8.3267	2.78399	0.00500551	ENSG00000230131	AL160290.2
5.38633	2.77068	0.021565	ENSG00000069482	GAL
7.88283	2.75866	0.0174687	ENSG00000287250
5.29586	2.7534	0.0389737	ENSG00000130475	FCHO1
4.5954	2.75146	0.0195919	ENSG00000288093
4.63422	2.71577	0.0232683	ENSG00000233627	C4A-AS1
9.66765	2.71047	0.0465717	ENSG00000180245	RRH
6.20229	2.70564	0.00609125	ENSG00000250672	AC010343.2
8.95567	2.69154	0.00582468	ENSG00000287769
9.99807	2.65236	0.018661	ENSG00000127995	CASD1
5.68108	2.62729	0.0338711	ENSG00000288980
7.22282	2.61381	0.0344921	ENSG00000152894	PTPRK
7.92769	2.61244	0.0499413	ENSG00000119547	ONECUT2
7.68675	2.58614	0.04251	ENSG00000137171	KLC4
5.97978	2.55415	0.0307335	ENSG00000013725	CD6
6.37166	2.54605	0.0239713	ENSG00000251410	AC007106.1
7.64355	2.52639	0.0127875	ENSG00000186526	CYP4F8
9.57265	2.51166	0.011845	ENSG00000285729
40.2304	2.50263	3.78838e-07	ENSG00000163053	SLC16A14
5.04953	2.49847	0.0381904	ENSG00000137955	RABGGTB
5.58876	2.49736	0.0437359	ENSG00000172053	QARS
8.7959	2.49337	0.00294744	ENSG00000243744	AC016546.1
6.22208	2.46315	0.027058	ENSG00000186453	FAM228A
8.21819	2.44844	0.0196934	ENSG00000129422	MTUS1
6.24597	2.44763	0.0495364	ENSG00000269825	AC022150.4
9.97753	2.43469	0.023751	ENSG00000167850	CD300C
8.90915	2.42846	0.00513007	ENSG00000234982	AL441963.1
6.12405	2.42506	0.0330295	ENSG00000274799	RF00017
7.49325	2.41093	0.0116967	ENSG00000185900	POMK
9.21513	2.40994	0.0175246	ENSG00000084676	NCOA1
6.20993	2.38872	0.0302649	ENSG00000011201	ANOS1
24.8707	2.38671	0.00420796	ENSG00000241743	XACT
9.28566	2.37629	0.0150537	ENSG00000167925	GHDC
6.28609	2.36589	0.0317193	ENSG00000289991
7.34733	2.3654	0.0216327	ENSG00000112116	IL17F
15.6963	2.34946	0.00032142	ENSG00000293315
9.10265	2.34703	0.0210387	ENSG00000224282	AC010469.1
14.4746	2.33907	0.00155828	ENSG00000248543	NPM1P41
581.773	2.33189	5.00084e-40	ENSG00000242352	FAM91A3P
5.66799	2.3191	0.0266205	ENSG00000112769	LAMA4
33.0541	2.31856	3.41668e-07	ENSG00000136104	RNASEH2B
13.2907	2.30158	0.00714012	ENSG00000251062	AC025459.1
17.4047	2.29892	0.000186642	ENSG00000154025	SLC5A10
10.3925	2.29492	0.00714223	ENSG00000237499	AL357060.1
28.3602	2.28487	0.000226224	ENSG00000261058	AC099508.2
19.2781	2.28123	5.66848e-05	ENSG00000115318	LOXL3
2122.15	2.27144	8.61894e-36	ENSG00000270788	PDLIM1P1
10.0668	2.27122	0.029746	ENSG00000241227	RN7SL553P
10.0231	2.2335	0.00490527	ENSG00000196873	CBWD3
10.7849	2.22426	0.0119898	ENSG00000162086	ZNF75A
53.0767	2.2189	9.95046e-09	ENSG00000184566	AC132216.1
205.741	2.21029	9.71929e-33	ENSG00000149639	SOGA1
30.9007	2.20767	3.87678e-05	ENSG00000168899	VAMP5
9.49465	2.20303	0.0178552	ENSG00000271475	AL078624.2
11.0227	2.19874	0.0474321	ENSG00000107518	ATRNL1
13.0619	2.1946	0.00388195	ENSG00000204131	NHSL2
8.95346	2.19064	0.0195176	ENSG00000184634	MED12
43.1604	2.18933	3.2156e-06	ENSG00000235849	HS6ST2-AS1
510.847	2.18507	3.54577e-50	ENSG00000089818	NECAP1
9.75795	2.17906	0.0406148	ENSG00000108592	FTSJ3
4.69569	2.17445	0.0461522	ENSG00000157259	GATAD1
20.862	2.16666	0.000856777	ENSG00000291202
8.60831	2.15825	0.0291813	ENSG00000273175	BX323046.1
11.1508	2.15154	0.0157502	ENSG00000211662	IGLV3-21
13.5223	2.14883	0.00491616	ENSG00000231826	LINC01819
14.6977	2.1451	0.00683529	ENSG00000207585	MIR181D
51.7803	2.12366	1.49646e-09	ENSG00000163312	HELQ
15.6086	2.1174	0.0317829	ENSG00000175564	UCP3
10.5473	2.11538	0.0193235	ENSG00000278657	AC245452.5
19.4698	2.10605	0.00182017	ENSG00000167858	TEKT1
14.6206	2.08879	0.0239922	ENSG00000113273	ARSB
10.38	2.08321	0.0219923	ENSG00000231871	IPO9-AS1
11.2653	2.08115	0.0463772	ENSG00000165416	SUGT1
6.88401	2.07913	0.0477189	ENSG00000293332
6.43663	2.0791	0.0439867	ENSG00000107651	SEC23IP
7.65317	2.05974	0.0210362	ENSG00000243156	MICAL3
8.49707	2.05925	0.0493827	ENSG00000277413	RF02271
13.0378	2.05719	0.00672027	ENSG00000284906	AC091057.5
35.7856	2.05384	1.66019e-06	ENSG00000180053	NKX2-6
80.9589	2.05318	1.51833e-09	ENSG00000206762	RNU6-418P
170.1	2.03937	6.23991e-13	ENSG00000227852	RPS29P17
124.883	2.0375	2.45276e-13	ENSG00000233397	AC008063.2
48.5433	2.02589	9.49042e-08	ENSG00000225349	AC022080.2
8.7144	2.02465	0.0282312	ENSG00000085365	SCAMP1
90.7298	2.01836	1.87335e-11	ENSG00000171246	NPTX1
12.8296	2.01784	0.00660493	ENSG00000102760	RGCC
11.5554	1.99712	0.0416941	ENSG00000265815	MIR1273G
8.56691	1.99011	0.0346344	ENSG00000285872
6.82896	1.99003	0.0383412	ENSG00000182315	MBD3L3
967.683	1.98913	5.25547e-23	ENSG00000134313	KIDINS220
1075.23	1.96314	2.13309e-34	ENSG00000066926	FECH
9.47963	1.95526	0.0290397	ENSG00000137714	FDX1
12.6918	1.9544	0.0240665	ENSG00000167232	ZNF91
10.9532	1.94761	0.0290504	ENSG00000275714	HIST1H3A
18.9961	1.9413	0.00586583	ENSG00000256582	LINC02390
66.4313	1.91997	6.16805e-09	ENSG00000167098	SUN5
89.0011	1.91738	8.18931e-11	ENSG00000262585	LINC01979
78.8402	1.90793	1.58308e-09	ENSG00000206562	METTL6
13.1955	1.89314	0.0415739	ENSG00000257458	AC069437.1
9.95444	1.88314	0.0216526	ENSG00000225639	PGAM1P2
15.9074	1.87279	0.0197656	ENSG00000074276	CDHR2
28.5543	1.86771	0.00269162	ENSG00000268240	AC123912.2
103.47	1.85412	2.36554e-08	ENSG00000237074	AL596218.1
60.5985	1.85136	6.35799e-06	ENSG00000184612	RPL7P26
27.459	1.83171	0.000517561	ENSG00000102699	PARP4
23.488	1.82135	0.0016878	ENSG00000229992	HMGB3P9
16.6398	1.81311	0.00709667	ENSG00000232564	AL031594.1
226.966	1.80641	5.61687e-21	ENSG00000279803	AC009090.5
8.36708	1.80376	0.04521	ENSG00000223886	AC073073.1
12.921	1.79571	0.00783092	ENSG00000270372	AL162413.1
15.3404	1.78828	0.00721575	ENSG00000258135	LINC02396
76.1664	1.7805	7.69858e-08	ENSG00000143119	CD53
15.535	1.77304	0.0159618	ENSG00000286823
11.114	1.76923	0.0422076	ENSG00000258845	AL139354.1
36.9251	1.75743	0.000143964	ENSG00000261775	AC012435.2
305.719	1.75166	8.44537e-21	ENSG00000283098	AL132857.2
16.8476	1.74598	0.00575727	ENSG00000249286	AMD1P3
796.36	1.74377	5.75472e-29	ENSG00000204052	LRRC73
290.816	1.7362	1.29237e-19	ENSG00000288043
429.618	1.73501	6.53951e-28	ENSG00000131725	WDR44
32.2829	1.72706	0.00062283	ENSG00000176697	BDNF
14.6888	1.72214	0.00774753	ENSG00000140990	NDUFB10
12.754	1.72205	0.0357826	ENSG00000204398	AL359649.1
127.05	1.71845	7.85809e-08	ENSG00000117500	TMED5
812.155	1.70339	6.32847e-27	ENSG00000204314	PRRT1
32.9126	1.6967	0.000459134	ENSG00000270890	AL049844.2
61.7131	1.67711	2.19561e-05	ENSG00000260249	AC007608.3
38.3295	1.6674	0.000746577	ENSG00000145868	FBXO38
101.128	1.6631	2.17415e-09	ENSG00000267646	AC008543.5
85.4935	1.66233	4.95618e-06	ENSG00000064205	WISP2
21.3765	1.66064	0.00272759	ENSG00000230428	AL049542.1
17.5436	1.65531	0.0395321	ENSG00000111371	SLC38A1
37.8011	1.6549	0.00171548	ENSG00000147059	SPIN2A
133.327	1.65323	3.83028e-11	ENSG00000268635	AP003680.1
19.9977	1.65106	0.0013136	ENSG00000230492	AL049651.1
101.85	1.65099	1.14878e-08	ENSG00000198785	GRIN3A
10.8104	1.65042	0.0413146	ENSG00000104967	NOVA2
12.0787	1.64709	0.0302107	ENSG00000141698	NT5C3B
16.3531	1.64605	0.0332781	ENSG00000182674	KCNB2
291.254	1.63781	2.65634e-10	ENSG00000285930
13.4788	1.63622	0.0337061	ENSG00000164951	PDP1
21.3776	1.63503	0.00468914	ENSG00000170088	TMEM192
16.3345	1.63495	0.0142279	ENSG00000229376	CICP3
33.6081	1.6343	0.000642661	ENSG00000253308	AC004080.1
11.0525	1.63335	0.04567	ENSG00000235257	ITGA9-AS1
11.2093	1.63267	0.0414559	ENSG00000243176	AC092944.1
78.5617	1.62688	3.54809e-07	ENSG00000101220	C20orf27
232.527	1.61493	1.67092e-09	ENSG00000212829	RPS26P3
154.851	1.61193	1.17516e-08	ENSG00000274376	ADAMTS7P1
12.4553	1.6103	0.0221951	ENSG00000197061	HIST1H4C
66.8071	1.61024	4.12473e-06	ENSG00000117791	MARC2
9.41057	1.60895	0.0385138	ENSG00000154678	PDE1C
159.997	1.60773	5.46816e-12	ENSG00000272004	FO704657.1
345.018	1.59395	6.74799e-18	ENSG00000149636	DSN1
22.1155	1.59362	0.00206778	ENSG00000254279	IGHVII-1-1
49.8741	1.58985	3.32135e-05	ENSG00000292309
51.6075	1.58955	1.18546e-06	ENSG00000167208	SNX20
136.103	1.58883	5.43394e-08	ENSG00000201791	RF00092
11.185	1.5865	0.0328981	ENSG00000000457	SCYL3
37.5885	1.58284	7.14676e-05	ENSG00000187870	RNFT1P3
45.0766	1.57676	0.000129728	ENSG00000173960	UBXN2A
9.37991	1.57527	0.035375	ENSG00000068394	GPKOW
23.3163	1.56791	0.0101581	ENSG00000275491	LINC01730
38.2725	1.56777	0.00104981	ENSG00000182220	ATP6AP2
12.3413	1.56531	0.0480927	ENSG00000287582
17.8561	1.56512	0.0169617	ENSG00000250986	AC141928.1
13.0759	1.55925	0.0163862	ENSG00000275516	AC100791.3
215.832	1.55774	3.22722e-16	ENSG00000114956	DGUOK
34.4225	1.54965	0.0015695	ENSG00000101746	NOL4
27.3436	1.54641	0.00875378	ENSG00000259947	LINC02124
72.2565	1.54144	2.85314e-07	ENSG00000163421	PROK2
17.0638	1.53874	0.0110775	ENSG00000127946	HIP1
226.357	1.53093	2.49421e-13	ENSG00000173826	KCNH6
1332.1	1.53073	5.04628e-21	ENSG00000186952	TMEM232
92.4152	1.5294	7.1542e-06	ENSG00000110931	CAMKK2
104.423	1.52898	6.56841e-08	ENSG00000253238	AC034114.2
23.8926	1.52774	0.0240792	ENSG00000280418	AC007326.2
475.15	1.527	0.000279192	ENSG00000110934	BIN2
21.8659	1.52638	0.00247428	ENSG00000165671	NSD1
26.7684	1.52515	0.00889849	ENSG00000206803	RNU6-968P
112.959	1.52386	1.96084e-06	ENSG00000263327	TAPT1-AS1
15.887	1.52367	0.0119676	ENSG00000287621
156.222	1.52006	3.35774e-09	ENSG00000136689	IL1RN
63.1871	1.52004	9.53246e-07	ENSG00000152402	GUCY1A2
16.4843	1.51975	0.0256073	ENSG00000183971	NPW
19.9984	1.5193	0.0341007	ENSG00000235779	AC079779.3
97.1555	1.51892	7.93599e-09	ENSG00000279135	AL512652.2
150.354	1.51131	1.48863e-10	ENSG00000230552	AC092162.2
2282.34	1.50897	4.66293e-09	ENSG00000251535	AC079140.4
1059.09	1.50636	6.07297e-25	ENSG00000236467	KCNMA1-AS1
100.981	1.50313	0.00018316	ENSG00000095906	NUBP2
107.354	-1.50477	0.000217059	ENSG00000214967	NPIPA7
230.274	-1.50756	2.91003e-08	ENSG00000172139	SLC9C1
446.927	-1.50849	6.9295e-21	ENSG00000010244	ZNF207
204.596	-1.51135	2.32018e-11	ENSG00000048405	ZNF800
123.482	-1.51217	2.42221e-10	ENSG00000004948	CALCR
73.9751	-1.51334	7.12736e-06	ENSG00000263004	AC007114.1
16.6596	-1.51759	0.0163367	ENSG00000173992	CCS
118.321	-1.51898	4.06527e-05	ENSG00000250334	LINC00989
600.357	-1.52086	1.62485e-18	ENSG00000290049
531.318	-1.52128	5.53906e-13	ENSG00000149499	EML3
53.6771	-1.52408	1.51139e-05	ENSG00000237279	AC099677.3
157.056	-1.5251	5.32031e-07	ENSG00000260911	AC135050.3
64.8319	-1.52652	4.6045e-06	ENSG00000231464	AC024937.2
199.492	-1.5275	8.25548e-09	ENSG00000180044	C3orf80
441.385	-1.53001	2.0101e-13	ENSG00000180739	S1PR5
72.707	-1.53509	6.40171e-05	ENSG00000162630	B3GALT2
49.0895	-1.53608	9.09118e-06	ENSG00000131183	SLC34A1
265.994	-1.53631	8.3327e-14	ENSG00000235720	GABPAP
155.366	-1.55045	4.30014e-08	ENSG00000167751	KLK2
31.2353	-1.55337	0.00149607	ENSG00000258481	AL133240.1
23.7514	-1.55509	0.00466059	ENSG00000048392	RRM2B
39.3954	-1.55537	0.00325419	ENSG00000287677
10.3937	-1.55912	0.044467	ENSG00000248114	AC114812.3
64.0643	-1.56368	0.000845515	ENSG00000289452
12.4993	-1.56406	0.0301986	ENSG00000177679	SRRM3
1302.58	-1.56406	1.51595e-22	ENSG00000143549	TPM3
68.7723	-1.56759	4.81956e-05	ENSG00000163347	CLDN1
21.0794	-1.5721	0.00361771	ENSG00000153789	FAM92B
16.632	-1.57327	0.0395893	ENSG00000140382	HMG20A
90.0965	-1.57679	4.39639e-06	ENSG00000136859	ANGPTL2
860.003	-1.58524	2.96052e-22	ENSG00000064547	LPAR2
41.8894	-1.59099	0.00014112	ENSG00000143882	ATP6V1C2
158.792	-1.59258	1.80269e-10	ENSG00000172046	USP19
56.0259	-1.59327	5.60063e-06	ENSG00000248749	AC104063.1
79.674	-1.59525	3.83159e-08	ENSG00000213296	AC005521.1
213.428	-1.59608	2.26988e-12	ENSG00000059758	CDK17
512.903	-1.5963	6.61423e-16	ENSG00000026508	CD44
84.6997	-1.60263	8.14562e-05	ENSG00000171241	SHCBP1
16.956	-1.60489	0.0230788	ENSG00000131482	G6PC
321.185	-1.60568	4.23922e-13	ENSG00000230257	NFE4
26.3129	-1.6062	0.00730649	ENSG00000259464	SNRPCP18
55.1693	-1.6069	4.08185e-07	ENSG00000066248	NGEF
16.2296	-1.6169	0.0141068	ENSG00000268947	AC002128.1
52.33	-1.61947	8.40422e-05	ENSG00000243389	AC012442.2
134.092	-1.62129	5.07785e-10	ENSG00000154065	ANKRD29
537.751	-1.62175	1.92331e-21	ENSG00000171812	COL8A2
91.8477	-1.62359	1.39199e-08	ENSG00000006118	TMEM132A
42.6808	-1.62615	0.000121172	ENSG00000235819	AL158828.1
16.3778	-1.62715	0.0098324	ENSG00000237989	LINC01679
183.938	-1.63124	9.61639e-19	ENSG00000275305	RNA5SP528
30.8909	-1.63276	0.00650263	ENSG00000007306	CEACAM7
9.76147	-1.63455	0.034535	ENSG00000109016	DHRS7B
62.6217	-1.63854	7.55564e-06	ENSG00000230876	LINC00486
70.6928	-1.64225	5.75676e-09	ENSG00000149016	TUT1
47.5538	-1.64723	3.3608e-05	ENSG00000293495
690.699	-1.6539	4.13622e-22	ENSG00000173517	PEAK1
48.564	-1.65527	0.00171195	ENSG00000250727	AC100871.1
17.4577	-1.65629	0.0166514	ENSG00000167220	HDHD2
223.281	-1.65633	2.39882e-13	ENSG00000275700	AATF
17.0776	-1.65645	0.00668626	ENSG00000267424	AC020934.1
14.5793	-1.66292	0.0336932	ENSG00000138587	MNS1
173.729	-1.66649	1.59004e-07	ENSG00000070614	NDST1
1384.8	-1.67345	6.94163e-42	ENSG00000172803	SNX32
41.5089	-1.67367	2.68957e-05	ENSG00000215388	ACTG1P3
33.4385	-1.68541	0.00030958	ENSG00000198478	SH3BGRL2
16.6156	-1.68936	0.00436524	ENSG00000168993	CPLX1
16.6921	-1.69071	0.00344757	ENSG00000258654	AC026495.1
16.6422	-1.69097	0.00470952	ENSG00000243849	CFAP44-AS1
21.5812	-1.69103	0.0019369	ENSG00000237446	RHEBP3
16.7583	-1.69516	0.00808403	ENSG00000259407	AC021739.2
39.0047	-1.69729	0.00424098	ENSG00000198590	C3orf35
1788.17	-1.69767	5.39496e-39	ENSG00000262768	AC100791.2
22.5047	-1.69895	0.000463203	ENSG00000258740	AL691403.1
44.4466	-1.69989	5.68317e-05	ENSG00000168734	PKIG
12.7107	-1.713	0.0153633	ENSG00000201483	RF00019
17.5578	-1.71432	0.0209457	ENSG00000255946	AC069234.1
68.7923	-1.71564	5.87125e-08	ENSG00000277758	FO681492.1
21.5625	-1.71686	0.0172216	ENSG00000261798	AL033527.3
9.92883	-1.73272	0.0363141	ENSG00000154143	PANX3
69.0309	-1.73514	1.41197e-08	ENSG00000224791	KRT18P39
34.7988	-1.73526	9.40197e-05	ENSG00000150977	RILPL2
43.3459	-1.73913	5.03986e-05	ENSG00000104889	RNASEH2A
37.2671	-1.74148	0.00199223	ENSG00000204183	GDF5OS
37.1561	-1.74218	4.93335e-05	ENSG00000213925	NPM1P33
8.61044	-1.74619	0.0454482	ENSG00000231668	PPP2R2DP1
26.7572	-1.7482	0.01484	ENSG00000187229	AC100800.1
210.048	-1.75422	3.73353e-17	ENSG00000250803	AC010255.3
116.114	-1.76123	6.60251e-10	ENSG00000249861	LGALS16
27.304	-1.76412	0.00265276	ENSG00000198088	NUP62CL
58.7621	-1.76896	4.22664e-08	ENSG00000104133	SPG11
136.478	-1.77127	2.23469e-12	ENSG00000226208	AL513285.1
39.6195	-1.77315	0.000790462	ENSG00000156006	NAT2
334.59	-1.78463	1.33653e-15	ENSG00000287961
236.456	-1.79443	2.03575e-16	ENSG00000142538	PTH2
66.4778	-1.79612	8.93946e-07	ENSG00000267076	CCDC58P3
222.296	-1.79863	2.53623e-13	ENSG00000089199	CHGB
14.3767	-1.79992	0.0354526	ENSG00000123870	ZNF137P
21.1798	-1.80148	0.000530924	ENSG00000259605	AC074212.1
6079.75	-1.80481	7.98884e-13	ENSG00000204392	LSM2
110.753	-1.80575	4.76152e-12	ENSG00000234477	AC004231.1
69.2796	-1.81113	1.00744e-07	ENSG00000132842	AP3B1
13.9501	-1.81209	0.0295508	ENSG00000288990
759.186	-1.81356	1.67842e-29	ENSG00000286938
119.756	-1.83228	3.67981e-17	ENSG00000240863	RN7SL645P
210.49	-1.83432	7.48095e-14	ENSG00000169288	MRPL1
51.783	-1.83904	3.95911e-06	ENSG00000230872	MFSD13B
42.5729	-1.8455	0.000760262	ENSG00000252582	RF00322
18.6688	-1.85282	0.00157323	ENSG00000249135	AC116347.2
81.8007	-1.85537	9.75015e-08	ENSG00000286978
68.1288	-1.8563	4.89183e-06	ENSG00000089048	ESF1
124.752	-1.86126	1.49696e-07	ENSG00000054967	RELT
387.719	-1.86184	1.91644e-24	ENSG00000166478	ZNF143
18.681	-1.86429	0.0250791	ENSG00000120063	GNA13
8.09639	-1.86778	0.0461684	ENSG00000263278	AC233701.1
18.7982	-1.87866	0.0108468	ENSG00000122483	CCDC18
68.4952	-1.88383	1.38951e-08	ENSG00000267065	LINC02080
14.0862	-1.89445	0.0110853	ENSG00000103275	UBE2I
14.716	-1.89915	0.0150259	ENSG00000225697	SLC26A6
400.743	-1.90653	4.90791e-28	ENSG00000188505	NCCRP1
4778.84	-1.9123	1.48694e-52	ENSG00000225484	NUTM2B-AS1
278.848	-1.91324	3.63159e-30	ENSG00000156218	ADAMTSL3
12.0376	-1.91385	0.0294381	ENSG00000177425	PAWR
30.4174	-1.92038	0.00126488	ENSG00000162433	AK4
8.68236	-1.92154	0.0318158	ENSG00000276102	MIR6747
543.594	-1.92456	1.10968e-40	ENSG00000293513
11.5659	-1.93014	0.0373197	ENSG00000267607	AC011511.5
236.636	-1.93251	1.98814e-22	ENSG00000185669	SNAI3
16.6177	-1.93529	0.0101825	ENSG00000140743	CDR2
10.9901	-1.94112	0.0148585	ENSG00000253406	AC012613.2
76.9583	-1.94272	1.69888e-08	ENSG00000254428	AP003392.1
227.423	-1.94612	3.50555e-20	ENSG00000196951	SCOC-AS1
10.4339	-1.95508	0.0310839	ENSG00000223810	KRT8P28
79.7931	-1.95544	1.61931e-09	ENSG00000228401	AL590226.1
38.9031	-1.96887	0.000128947	ENSG00000161677	JOSD2
12.2607	-1.97009	0.0112167	ENSG00000187097	ENTPD5
48.7927	-1.97391	0.000121279	ENSG00000264115	MIR3180-4
96.2332	-1.97577	1.59472e-07	ENSG00000155749	ALS2CR12
14.2043	-1.97673	0.00482585	ENSG00000286172
1062.91	-1.9795	4.08262e-67	ENSG00000276975	HYDIN2
68.2715	-1.98322	3.90302e-07	ENSG00000268375	AC010325.2
239.818	-1.98749	4.12055e-20	ENSG00000258101	AC010173.1
51.1899	-1.98945	2.47749e-05	ENSG00000130783	CCDC62
77.4659	-1.99154	1.46332e-09	ENSG00000265902	MIR4696
9.05021	-2.0028	0.0376112	ENSG00000279789	AC120114.4
9.83217	-2.00497	0.00783589	ENSG00000257846	AL512310.6
38.849	-2.01865	3.34847e-06	ENSG00000122026	RPL21
23.3439	-2.02935	0.000157471	ENSG00000170836	PPM1D
10.7418	-2.03544	0.0334115	ENSG00000182816	KRTAP13-2
917.47	-2.03564	2.41068e-28	ENSG00000146192	FGD2
7.37774	-2.04153	0.0323145	ENSG00000269867	AC010326.3
20.4985	-2.04863	0.00157195	ENSG00000234906	APOC2
73.9741	-2.04888	1.06482e-07	ENSG00000109101	FOXN1
20.5925	-2.05909	0.00238572	ENSG00000257954	AC125611.2
10.6663	-2.07337	0.0179989	ENSG00000160062	ZBTB8A
385.007	-2.07461	1.17403e-30	ENSG00000166822	TMEM170A
12.8071	-2.08576	0.00758924	ENSG00000287185
16.502	-2.08719	0.00417922	ENSG00000290611
97.1196	-2.08869	1.14434e-10	ENSG00000164303	ENPP6
41.6806	-2.09161	4.37446e-05	ENSG00000164742	ADCY1
98.405	-2.10106	5.40189e-15	ENSG00000237037	NDUFA6-AS1
79.6543	-2.10138	1.73975e-12	ENSG00000259364	AC013356.3
6.56437	-2.10491	0.0415205	ENSG00000287855
16.3822	-2.10704	0.00671357	ENSG00000263883	EEF1DP7
11.5369	-2.1101	0.0143536	ENSG00000129596	CDO1
19.3885	-2.11049	0.00116923	ENSG00000112559	MDFI
8.20334	-2.11082	0.0270888	ENSG00000101972	STAG2
8.39249	-2.11288	0.0444141	ENSG00000225643	AL606491.1
10.0697	-2.11781	0.0213247	ENSG00000227860	MTND5P18
150.207	-2.13624	1.7644e-15	ENSG00000161634	DCD
7.79944	-2.14188	0.033077	ENSG00000156463	SH3RF2
59.5268	-2.14352	7.08199e-08	ENSG00000267197	AC011461.1
6.27674	-2.14795	0.0412605	ENSG00000272599	AC016394.2
18.0355	-2.15306	0.00512073	ENSG00000268117	VN1R84P
439.431	-2.1587	4.32792e-31	ENSG00000260488	AC007216.1
7.77545	-2.16491	0.0155038	ENSG00000214259	AC018695.1
18.3306	-2.17302	0.00675688	ENSG00000234758	AC034228.3
215.852	-2.17304	2.09306e-33	ENSG00000227352	ARHGEF7-AS1
11.4237	-2.17552	0.0420139	ENSG00000293346
7.14717	-2.17636	0.0270588	ENSG00000260236	AC099778.1
7.64496	-2.18279	0.0183199	ENSG00000265612	MIR4539
6.75359	-2.18404	0.0350644	ENSG00000183347	GBP6
71.8115	-2.19014	4.65085e-08	ENSG00000290900
9.93834	-2.19567	0.0243582	ENSG00000146216	TTBK1
15.1888	-2.22528	0.00698338	ENSG00000265758	LINC01900
36.5497	-2.22661	4.96737e-06	ENSG00000224738	AC099850.1
6.21713	-2.25325	0.0474072	ENSG00000285917
8.08581	-2.27557	0.0135957	ENSG00000285860
2340.12	-2.29406	9.9563e-58	ENSG00000171611	PTCRA
9.04878	-2.33604	0.0206842	ENSG00000069764	PLA2G10
13.2671	-2.34741	0.000415161	ENSG00000264343	NOTCH2NL
17.0202	-2.35866	0.00115163	ENSG00000254949	GNG5P3
14.7366	-2.37207	0.0172923	ENSG00000241654	RPL19P18
123.74	-2.37766	3.24296e-15	ENSG00000175556	LONRF3
737.852	-2.38112	4.5497e-36	ENSG00000235890	TSPEAR-AS1
74.6913	-2.3854	1.19675e-10	ENSG00000170953	OR8B12
13.9077	-2.38559	0.00127123	ENSG00000204186	ZDBF2
5.81763	-2.38601	0.0397951	ENSG00000270806	C17orf50
99.2785	-2.39851	1.32897e-13	ENSG00000282907	Z98883.1
254.239	-2.41036	1.13119e-39	ENSG00000124126	PREX1
11.5964	-2.41587	0.00696092	ENSG00000284625	AP000867.4
11.8312	-2.41757	0.000281219	ENSG00000197454	OR2L5
7.02397	-2.42359	0.0225882	ENSG00000171314	PGAM1
12.4272	-2.43001	0.0274623	ENSG00000148516	ZEB1
15.3475	-2.43407	0.0229269	ENSG00000268614	AC008878.2
25.7131	-2.44609	6.47939e-06	ENSG00000156509	FBXO43
6.68687	-2.46221	0.0273107	ENSG00000211928	IGHD5-5
41.6449	-2.46815	4.20747e-10	ENSG00000073734	ABCB11
91.7274	-2.50647	6.39577e-12	ENSG00000242062	MARK2P6
11.9072	-2.50888	0.00777285	ENSG00000287608
25.3257	-2.50927	1.43707e-05	ENSG00000261103	AC009063.3
20.745	-2.51044	5.77545e-05	ENSG00000117475	BLZF1
54.8603	-2.51856	2.68777e-09	ENSG00000226961	PPIAP60
31.7306	-2.53099	1.5902e-05	ENSG00000272918	AC005070.3
8.05077	-2.54704	0.00641951	ENSG00000267291	AC008649.1
19.0227	-2.56491	0.000472184	ENSG00000122420	PTGFR
4.24383	-2.57206	0.0398936	ENSG00000288781
9.78967	-2.6111	0.0158072	ENSG00000257108	NHLRC4
16.532	-2.61981	0.000121068	ENSG00000089157	RPLP0
51.1295	-2.63022	9.90263e-09	ENSG00000283644	ETDC
24.5521	-2.65821	0.000108556	ENSG00000213148	AC073465.1
179.3	-2.66397	1.3162e-29	ENSG00000109881	CCDC34
7.0165	-2.73547	0.0134674	ENSG00000285822
10.2896	-2.76463	0.00124999	ENSG00000143321	HDGF
4.85798	-2.78142	0.0172962	ENSG00000289518
4.61089	-2.81007	0.0415441	ENSG00000258990	MPPE1P1
5.05453	-2.81356	0.0267888	ENSG00000205018	AC092384.1
3.9562	-2.8235	0.0499844	ENSG00000166523	CLEC4E
7.21903	-2.8243	0.0486073	ENSG00000132837	DMGDH
3.72898	-2.83409	0.0469812	ENSG00000267769	AC011498.6
5.34604	-2.86869	0.0228029	ENSG00000287498
5.56546	-2.88976	0.0148212	ENSG00000167106	FAM102A
6.57153	-2.89768	0.026409	ENSG00000249199	AC026785.3
5.04727	-2.89842	0.0183741	ENSG00000233014	TBC1D3P7
3.38096	-2.90814	0.0458939	ENSG00000179954	SSC5D
3.29079	-2.90879	0.034567	ENSG00000124915	AP002380.1
558.406	-2.92296	2.86052e-55	ENSG00000078795	PKD2L2
4.39594	-2.92503	0.0454753	ENSG00000225905	AL391244.2
4.43517	-2.9318	0.0246242	ENSG00000104856	RELB
3.80868	-2.94721	0.0483782	ENSG00000160255	ITGB2
4.67465	-2.97141	0.0462576	ENSG00000227538	HNRNPFP1
3.89623	-3.01971	0.0409042	ENSG00000109063	MYH3
4.4808	-3.01991	0.0218615	ENSG00000177627	C12orf54
4.69672	-3.0275	0.0200409	ENSG00000117010	ZNF684
25.7456	-3.07516	4.37522e-06	ENSG00000232090	AC016724.1
4.87224	-3.0813	0.0417876	ENSG00000230645	LINC01818
24.0895	-3.11338	1.40192e-05	ENSG00000279827	AC136469.2
8.24435	-3.11634	0.00223088	ENSG00000103023	PRSS54
4.88236	-3.11815	0.0399942	ENSG00000257176	AC009318.1
5.00982	-3.11934	0.0182079	ENSG00000132589	FLOT2
3.65942	-3.12245	0.0438645	ENSG00000214026	MRPL23
5.22035	-3.14628	0.0118008	ENSG00000199248	RNU6-28P
8.57575	-3.15883	0.00321934	ENSG00000205856	C22orf42
3.04985	-3.16235	0.0447789	ENSG00000156269	NAA11
3.50287	-3.16346	0.0349492	ENSG00000116898	MRPS15
3.56897	-3.19749	0.0336431	ENSG00000221970	OR2A1
4.40773	-3.20475	0.0185905	ENSG00000252130	RNU6-1045P
4.39691	-3.22947	0.0485728	ENSG00000028203	VEZT
9.16035	-3.23213	0.00461044	ENSG00000259246	HMGN2P47
2.49053	-3.23999	0.041551	ENSG00000135736	CCDC102A
5.66965	-3.27142	0.0206779	ENSG00000255652	AC140847.2
3.20498	-3.27282	0.0499888	ENSG00000151461	UPF2
4.23304	-3.28686	0.029964	ENSG00000127220	ABHD8
3.59026	-3.29254	0.0261115	ENSG00000211909	IGHD5-24
27.2893	-3.30629	2.90074e-10	ENSG00000281248	LINC02536
5.00365	-3.3358	0.0234271	ENSG00000040633	PHF23
3.03075	-3.33874	0.0493809	ENSG00000143748	NVL
4.52666	-3.34415	0.0293021	ENSG00000136868	SLC31A1
2.55829	-3.34781	0.0480329	ENSG00000224273	AC005077.2
2.75738	-3.37023	0.0418259	ENSG00000243284	VSIG8
2.79924	-3.37466	0.0378863	ENSG00000174607	UGT8
5.66263	-3.40697	0.00612989	ENSG00000270623	SPCS2P2
11.2121	-3.42426	0.000105414	ENSG00000149124	GLYAT
3.45826	-3.45233	0.0375859	ENSG00000263717	AC079336.1
5.52772	-3.47678	0.0106452	ENSG00000261594	TPBGL
4.12358	-3.50985	0.0209914	ENSG00000287587
4.44604	-3.56197	0.0256046	ENSG00000115183	TANC1
3.75536	-3.6102	0.0242303	ENSG00000276768	AL121890.2
4.26538	-3.63149	0.0215293	ENSG00000292385
4.74284	-3.64608	0.00878515	ENSG00000212620	RF00072
2.19339	-3.67415	0.0446906	ENSG00000293499
3.46625	-3.70742	0.0224009	ENSG00000108242	CYP2C18
2.25061	-3.70892	0.0461927	ENSG00000279878	AP003108.5
3.77442	-3.71333	0.0333931	ENSG00000250517	LDHAL6CP
3.05562	-3.77099	0.0251583	ENSG00000187753	C9orf153
2.70261	-3.77163	0.0445789	ENSG00000127418	FGFRL1
2.92731	-3.77782	0.0190879	ENSG00000280424	BX537318.2
138.403	-3.77989	2.48605e-42	ENSG00000238845	RF00019
2.96523	-3.78391	0.0357339	ENSG00000264266	MIR4322
3.58163	-3.79137	0.0203377	ENSG00000188257	PLA2G2A
2.83092	-3.84164	0.0214801	ENSG00000163283	ALPP
2.76756	-3.84639	0.0289756	ENSG00000079246	XRCC5
3.25973	-3.85281	0.022314	ENSG00000124089	MC3R
1.58444	-3.86186	0.0464531	ENSG00000229878	AL365203.1
2.64688	-3.86356	0.0438266	ENSG00000141030	COPS3
3.27177	-3.90093	0.0495611	ENSG00000236018	AC004898.1
4.17838	-3.91381	0.0270392	ENSG00000272808	AC015712.6
3.01784	-3.91753	0.0351811	ENSG00000278192	AL118505.1
4.32433	-3.91882	0.0154604	ENSG00000062282	DGAT2
2.62505	-3.93789	0.0219854	ENSG00000260403	AC120498.3
2.39644	-3.973	0.0267397	ENSG00000267159	AC005379.1
2.2488	-3.98514	0.0335197	ENSG00000165168	CYBB
1.7216	-3.98934	0.0461451	ENSG00000237510	GPAT2P1
8.96467	-4.03104	2.18735e-05	ENSG00000146360	GPR6
2.15268	-4.03877	0.0224234	ENSG00000278952	AP003068.4
2.62473	-4.03961	0.0274299	ENSG00000165675	ENOX2
3.26119	-4.04843	0.0307231	ENSG00000227000	HSPD1P14
3.87317	-4.06229	0.0211451	ENSG00000258122	AC044802.2
3.07867	-4.0819	0.0338411	ENSG00000289134
3.5959	-4.1378	0.0303387	ENSG00000113303	BTNL8
3.37185	-4.1597	0.0237471	ENSG00000184811	TUSC5
3.55268	-4.16509	0.0150673	ENSG00000239953	RN7SL273P
2.84326	-4.17782	0.0168198	ENSG00000241577	AC060234.3
3.15808	-4.18905	0.0439819	ENSG00000125676	THOC2
2.25661	-4.21192	0.0325759	ENSG00000225638	PABPC1P12
4.48494	-4.22611	0.0083764	ENSG00000179262	RAD23A
2.00375	-4.23728	0.0242274	ENSG00000269980	AC068768.2
1.37388	-4.24763	0.0487137	ENSG00000104371	DKK4
1.47598	-4.25558	0.0466027	ENSG00000185291	IL3RA
1.45873	-4.25907	0.0467648	ENSG00000253215	AC087273.1
2.5952	-4.27242	0.031866	ENSG00000228971	AL356479.1
3.36042	-4.28417	0.0267387	ENSG00000119280	C1orf198
2.09554	-4.3035	0.0242454	ENSG00000230280	HNRNPA1P59
4.35375	-4.31002	0.00656137	ENSG00000099940	SNAP29
3.00684	-4.31498	0.0299481	ENSG00000221910	OR2F2
2.6571	-4.3197	0.027411	ENSG00000136824	SMC2
2.48279	-4.32376	0.0114714	ENSG00000272688	AP005329.3
1.44188	-4.34654	0.0405548	ENSG00000290803
6.34149	-4.36957	0.00371835	ENSG00000286195
2.32143	-4.39862	0.0269694	ENSG00000180424	DEFB123
2.68329	-4.40973	0.0201008	ENSG00000242612	DECR2
2.84394	-4.41663	0.0261905	ENSG00000196639	HRH1
5.16639	-4.44211	0.00176729	ENSG00000145321	GC
2.72712	-4.44558	0.0129492	ENSG00000120949	TNFRSF8
3.35201	-4.47933	0.0165551	ENSG00000198732	SMOC1
5.37098	-4.48983	0.00338475	ENSG00000204897	KRT25
4.99884	-4.51169	0.0047192	ENSG00000168487	BMP1
3.55017	-4.53101	0.0136787	ENSG00000054356	PTPRN
2.52301	-4.56871	0.0224364	ENSG00000157884	CIB4
2.37344	-4.56909	0.0110157	ENSG00000221345	RF00012
6.26215	-4.59448	0.000602211	ENSG00000114013	CD86
3.0145	-4.61462	0.00905666	ENSG00000225463	ZNF70P1
3.26263	-4.63241	0.0124061	ENSG00000279859	AC093323.2
3.33082	-4.65894	0.00538952	ENSG00000189182	KRT77
1.59289	-4.67875	0.0327277	ENSG00000260131	LINC00556
3.36221	-4.69329	0.0173062	ENSG00000161016	RPL8
2.19157	-4.716	0.0323406	ENSG00000206875	RNU6-761P
2.64678	-4.73385	0.0161963	ENSG00000227888	FAM66A
1.89937	-4.84102	0.0207875	ENSG00000235790	AC114488.2
2.98077	-4.90539	0.00835172	ENSG00000244743	AC087588.1
3.76824	-4.90694	0.00643683	ENSG00000264635	AP001020.2
3.1449	-4.91719	0.00311597	ENSG00000161912	ADCY10P1
3.30119	-5.01339	0.00169141	ENSG00000138135	CH25H
5.56484	-5.07669	0.000662234	ENSG00000275432	AC022149.1
2.39583	-5.10378	0.0109606	ENSG00000204434	POTEKP
2.62054	-5.248	0.00730889	ENSG00000102970	CCL17
13.3648	-5.70557	9.33439e-08	ENSG00000258734	AL049873.2

## Sheet: 3A vs 16B
baseMean	log2FoldChange	pvalue	Ensembl	Gene Name
11.7537	6.28565	2.87458e-07	ENSG00000006625	GGCT
3.07995	5.28109	0.00693995	ENSG00000285786
4.55052	5.20154	0.000776323	ENSG00000178919	FOXE1
3.12786	4.96346	0.0171821	ENSG00000281460	AL049541,2
2.19339	4.95619	0.00691661	ENSG00000293499
2.92803	4.93184	0.00710428	ENSG00000276110	AC242988,1
2.44056	4.92023	0.0171221	ENSG00000225857	AL162431,1
2.50296	4.79671	0.0227713	ENSG00000225492	GBP1P1
2.0434	4.79418	0.0131025	ENSG00000212232	SNORD17
2.71622	4.74836	0.0118493	ENSG00000134748	PRPF38A
2.36716	4.73669	0.0321014	ENSG00000232378	RPL29P28
3.42605	4.68314	0.0170489	ENSG00000259144	RANBP20P
2.06959	4.67393	0.0202627	ENSG00000232346	Z74021,1
6.61454	4.62054	0.0032682	ENSG00000136695	IL36RN
1.97306	4.59167	0.0208352	ENSG00000229994	RPL5P4
3.1455	4.56843	0.00868571	ENSG00000261273	AC138512,1
1.67394	4.53104	0.0359855	ENSG00000197417	SHPK
2.75738	4.50112	0.0102795	ENSG00000243284	VSIG8
5.73389	4.47416	0.0084936	ENSG00000269713	NBPF9
2.1438	4.44782	0.0426067	ENSG00000280351	AC127496,7
3.24622	4.40218	0.00597366	ENSG00000287064
3.18695	4.39885	0.0132626	ENSG00000144837	PLA1A
2.35592	4.3976	0.0473521	ENSG00000271698	AC233992,2
1.76792	4.37593	0.0354789	ENSG00000216359	AL139039,1
1.71323	4.33393	0.0402594	ENSG00000270832	AC092120,2
2.305	4.30687	0.0324292	ENSG00000137504	CREBZF
13.3648	4.2935	5.44627e-07	ENSG00000258734	AL049873,2
1.65892	4.27669	0.0433573	ENSG00000288051
2.51344	4.26849	0.0311389	ENSG00000178999	AURKB	10
4.62896	4.2503	0.0141031	ENSG00000268480	LINC01862
2.78442	4.23911	0.00980138	ENSG00000284653	AL357509,1
2.33837	4.23075	0.0354916	ENSG00000289222
2.36951	4.20153	0.0330572	ENSG00000253557	AC100849,1
2.7372	4.14678	0.0194429	ENSG00000231993	EP300-AS1
3.59026	4.09403	0.0119536	ENSG00000211909	IGHD5-24
4.05747	4.0932	0.0133056	ENSG00000267057	LINC01905
2.00375	4.08762	0.0297118	ENSG00000269980	AC068768,2
1.97454	4.00861	0.0285191	ENSG00000235219	AC236972,2
2.49716	3.98969	0.0283175	ENSG00000283360	AL592295,3
6.43826	3.98943	0.00444308	ENSG00000173575	CHD2
3.15266	3.98859	0.0451809	ENSG00000260425	AL031709,1
2.4936	3.96317	0.0232486	ENSG00000230994	FGFR3P1
1.83154	3.94521	0.0430663	ENSG00000252606	RNU6-1150P
8.96467	3.91847	4.0182e-05	ENSG00000146360	GPR6
3.17638	3.87345	0.025417	ENSG00000253343	AC114550,2
3.44227	3.87267	0.0264259	ENSG00000281183	NPTN-IT1
3.20609	3.86194	0.0123947	ENSG00000231868	AL031848,1
2.95672	3.84538	0.0370277	ENSG00000291143
2.37729	3.83086	0.0420771	ENSG00000126067	PSMB2
3.95747	3.80643	0.0178141	ENSG00000261183	SPINT1-AS1
4.38633	3.80613	0.0222171	ENSG00000274214	AP005212,2
4.30477	3.76048	0.0165103	ENSG00000135443	KRT85
4.53774	3.75397	0.00848438	ENSG00000134030	CTIF
2.93561	3.73784	0.0432231	ENSG00000231967	AL135786,1
3.0943	3.73765	0.019859	ENSG00000227818	AL590408,1
3.72698	3.7315	0.0333413	ENSG00000200871	RNU6-810P
2.83271	3.64218	0.0278082	ENSG00000231653	AC010731,3
2.67912	3.59443	0.0428351	ENSG00000008405	CRY1
4.89796	3.57063	0.010607	ENSG00000258602	LINC01629
138.403	3.52665	1.0914e-37	ENSG00000238845	RF00019
4.20741	3.5178	0.0125504	ENSG00000250039	AC096719,1
3.9939	3.48364	0.0273685	ENSG00000293560
3.74261	3.44644	0.0461083	ENSG00000281756	C2-AS1
4.40789	3.41738	0.0296466	ENSG00000238003	RPL10P4
3.13954	3.38788	0.0445706	ENSG00000238061	AL356273,2
5.53536	3.3771	0.0105462	ENSG00000268756	AC104534,1
3.4245	3.3709	0.0396304	ENSG00000287244
3.29508	3.34673	0.0478881	ENSG00000278456	AC015712,7
4.43517	3.32903	0.0147906	ENSG00000104856	RELB
3.70005	3.26099	0.0490769	ENSG00000133063	CHIT1
5.98624	3.19628	0.0137127	ENSG00000278376	AP004609,3
3.21855	3.13867	0.0457882	ENSG00000225438	KRT41P
16.532	3.13171	1.17381e-05	ENSG00000089157	RPLP0	20
27.2893	3.11167	2.57004e-09	ENSG00000281248	LINC02536
17.1142	2.99771	0.000135412	ENSG00000174697	LEP
7.56509	2.87842	0.00503953	ENSG00000174450	GOLGA6L2
3.45135	2.86588	0.0340186	ENSG00000198128	OR2L3
7.43249	2.82926	0.00655481	ENSG00000233214	AC002511,2
18.0355	2.80756	0.000421193	ENSG00000268117	VN1R84P
3.98341	2.7915	0.0418768	ENSG00000249131	PSD2-AS1
6.90011	2.78088	0.0200966	ENSG00000205301	MGAT4D
6.86181	2.78017	0.0365666	ENSG00000248359	AC010280,1
37.2671	2.77947	2.23293e-06	ENSG00000204183	GDF5OS
3.61341	2.73059	0.0397144	ENSG00000222222	RNU2-17P
16.7583	2.72822	6.84736e-05	ENSG00000259407	AC021739,2
7.02238	2.70717	0.0213104	ENSG00000158526	TSR2
4.53212	2.70479	0.0470826	ENSG00000171045	TSNARE1
91.7274	2.6844	3.81865e-13	ENSG00000242062	MARK2P6
3.40599	2.68164	0.0433654	ENSG00000258744	AL132800,1
16.3822	2.6369	0.000991092	ENSG00000263883	EEF1DP7
7.27996	2.62538	0.0481441	ENSG00000086848	ALG9
4.63924	2.61128	0.0282302	ENSG00000258650	HSBP1P1
239.818	2.60159	1.53294e-31	ENSG00000258101	AC010173,1
7.69081	2.59631	0.0217178	ENSG00000119509	INVS
6.08106	2.59261	0.030215	ENSG00000271146	AC018889,1
17.0255	2.59167	0.00211515	ENSG00000231636	AGBL5-AS1
6.37412	2.58719	0.0202662	ENSG00000288010
25.7543	2.57002	3.99675e-05	ENSG00000139197	PEX5
14.2043	2.56128	0.000466979	ENSG00000286172
18.3306	2.54435	0.00186302	ENSG00000234758	AC034228,3
53.3411	2.52665	4.02261e-10	ENSG00000139921	TMX1
8.51126	2.51196	0.0101108	ENSG00000088002	SULT2B1
3.79391	2.51114	0.0492846	ENSG00000290684
179.3	2.47928	6.10326e-26	ENSG00000109881	CCDC34
6.21713	2.47364	0.0328704	ENSG00000285917
98.405	2.46993	4.79039e-19	ENSG00000237037	NDUFA6-AS1
4.91969	2.44356	0.0452368	ENSG00000213908	CYP2A7P1
59.5268	2.43836	1.84937e-09	ENSG00000267197	AC011461,1
54.8603	2.42828	1.06795e-08	ENSG00000226961	PPIAP60
9.9681	2.41991	0.0106369	ENSG00000237250	AL359924,1
24.0895	2.40865	0.000571662	ENSG00000279827	AC136469,2
7.61493	2.40567	0.00497093	ENSG00000104998	IL27RA
6.00214	2.3976	0.0489788	ENSG00000227764	LINC01693
39.0047	2.397	7.96338e-05	ENSG00000198590	C3orf35
558.406	2.3969	1.83773e-38	ENSG00000078795	PKD2L2
8.50289	2.38038	0.0154296	ENSG00000281005	LINC00921
3.64608	2.35559	0.0486945	ENSG00000143368	SF3B4
7.50315	2.35445	0.0206796	ENSG00000284605	AC127526,3
51.1295	2.34501	2.74366e-07	ENSG00000283644	ETDC
150.207	2.33311	9.74605e-18	ENSG00000161634	DCD
7.3987	2.30904	0.0479606	ENSG00000242110	AMACR
8.46433	2.30414	0.024318	ENSG00000261222	AC064805,1
22.3906	2.29987	0.00133465	ENSG00000093217	XYLB
6.55625	2.28687	0.0399434	ENSG00000274973	BSNDP2
14.3767	2.27878	0.00921039	ENSG00000123870	ZNF137P
28.2471	2.27696	1.78774e-06	ENSG00000252992	RF00564
123.74	2.265	6.57114e-14	ENSG00000175556	LONRF3
12.4103	2.26429	0.00880871	ENSG00000174567	GOLT1A
35.1967	2.25225	5.62662e-07	ENSG00000237758	BANF1P3
16.6722	2.23868	0.00690576	ENSG00000137700	SLC37A4
12.7935	2.22396	0.00413632	ENSG00000255142	AP006621,2
10.2604	2.21912	0.00891954	ENSG00000130377	ACSBG2
7.99105	2.21044	0.0151564	ENSG00000189068	VSTM1
17.5578	2.20803	0.00368789	ENSG00000255946	AC069234,1
59.5182	2.20277	4.50857e-09	ENSG00000256627	AC073651,2
45.9429	2.20244	6.54906e-09	ENSG00000275052	PPP4R3B
8.24435	2.19706	0.0236189	ENSG00000103023	PRSS54
13.5346	2.18018	0.00180171	ENSG00000132763	MMACHC
99.2785	2.17796	1.57482e-11	ENSG00000282907	Z98883,1
6.75984	2.16983	0.038317	ENSG00000282277	CYP3A51P
68.2715	2.15359	5.16156e-08	ENSG00000268375	AC010325,2
215.852	2.14474	3.68447e-32	ENSG00000227352	ARHGEF7-AS1
737.852	2.13552	2.02195e-29	ENSG00000235890	TSPEAR-AS1
124.752	2.13061	2.6148e-09	ENSG00000054967	RELT
50.8971	2.12862	0.0392557	ENSG00000085276	MECOM
79.7931	2.10506	1.4742e-10	ENSG00000228401	AL590226,1
79.6543	2.09997	2.71029e-12	ENSG00000259364	AC013356,3
23.5433	2.08535	0.0126687	ENSG00000125637	PSD4
25.2978	2.07848	5.37213e-05	ENSG00000215131	C16orf90
9.7598	2.07671	0.0218632	ENSG00000225658	TAF13P2
2340.12	2.07555	1.25219e-47	ENSG00000171611	PTCRA
236.636	2.07174	5.39887e-25	ENSG00000185669	SNAI3
17.2815	2.0697	0.0046069	ENSG00000259469	AC084757,2
7.52306	2.06008	0.0365336	ENSG00000104643	MTMR9
5.19238	2.05792	0.0319315	ENSG00000215861	AC245297,1
254.239	2.05115	9.31873e-30	ENSG00000124126	PREX1
43.3459	2.051	2.79035e-06	ENSG00000104889	RNASEH2A
20.745	2.04998	0.000843724	ENSG00000117475	BLZF1
73.9741	2.04611	1.2847e-07	ENSG00000109101	FOXN1
11.0525	2.04475	0.0356658	ENSG00000235257	ITGA9-AS1
236.456	2.03962	2.75749e-20	ENSG00000142538	PTH2
21.5812	2.03606	0.000277068	ENSG00000237446	RHEBP3
21.5625	2.03419	0.00540547	ENSG00000261798	AL033527,3
223.281	2.01998	1.41098e-18	ENSG00000275700	AATF
24.8774	2.01443	0.000303205	ENSG00000240305	AC091152,1
385.007	2.01431	7.63187e-29	ENSG00000166822	TMEM170A
110.753	1.99851	5.06217e-14	ENSG00000234477	AC004231,1
71.8115	1.99182	6.46575e-07	ENSG00000290900
917.47	1.99106	4.02853e-27	ENSG00000146192	FGD2
81.7888	1.98651	8.20801e-09	ENSG00000279953	AC117503,3
13.0244	1.98292	0.0297064	ENSG00000275616	RF00004
12.3752	1.97107	0.0278185	ENSG00000262262	AC026271,2
10.0697	1.9696	0.032305	ENSG00000227860	MTND5P18
28.9345	1.96522	0.000442434	ENSG00000233311	MTCO1P54
14.1309	1.96101	0.00558412	ENSG00000042753	AP2S1
22.348	1.95647	0.00397259	ENSG00000287478
7.51765	1.95447	0.0391486	ENSG00000229798	KRT18P26
19.0227	1.9497	0.0067415	ENSG00000122420	PTGFR
74.6913	1.94748	1.05705e-07	ENSG00000170953	OR8B12
50.7705	1.945	8.98652e-08	ENSG00000149474	KAT14
19.5868	1.94488	0.00463971	ENSG00000188765	TMSB4XP2
70.6928	1.93645	2.21362e-11	ENSG00000149016	TUT1
7.42776	1.93573	0.0444029	ENSG00000142235	LMTK3
25.7921	1.93482	0.00146027	ENSG00000266059	RN7SL140P
210.49	1.9322	5.10855e-15	ENSG00000169288	MRPL1
173.729	1.91633	2.2099e-09	ENSG00000070614	NDST1
7.4464	1.91455	0.0391907	ENSG00000278267	MIR6859-1
97.1196	1.91085	3.57276e-09	ENSG00000164303	ENPP6
334.59	1.9104	1.80908e-17	ENSG00000287961
210.048	1.90401	1.59196e-19	ENSG00000250803	AC010255,3
25.8818	1.89649	0.000836388	ENSG00000276850	AC245041,2
49.1653	1.88948	9.18243e-06	ENSG00000197774	EME2
6.51505	1.88409	0.0458281	ENSG00000164270	HTR4
51.1899	1.87537	7.18359e-05	ENSG00000130783	CCDC62
14.9131	1.85287	0.00779375	ENSG00000293143
31.7306	1.84963	0.00129206	ENSG00000272918	AC005070,3
11.5659	1.8485	0.0466837	ENSG00000267607	AC011511,5
42.5577	1.84666	0.000456944	ENSG00000260159	AC091304,2
66.5289	1.8382	9.63889e-11	ENSG00000158195	WASF2
28.6083	1.83362	0.000207496	ENSG00000227911	LINC02344
62.761	1.83205	1.48076e-07	ENSG00000204904	LINC01545
1302.58	1.82818	5.64917e-30	ENSG00000143549	TPM3
18.7214	1.82776	0.00700171	ENSG00000176393	RNPEP
68.7329	1.82465	1.37619e-07	ENSG00000285230	RALY-AS1
136.478	1.82417	7.40079e-13	ENSG00000226208	AL513285,1
11.7787	1.82056	0.0264955	ENSG00000236079	Z85994,2
149.56	1.81935	5.96822e-15	ENSG00000258115	AC090109,1
52.33	1.81432	1.35666e-05	ENSG00000243389	AC012442,2
28.975	1.80117	0.00518941	ENSG00000108468	CBX1
155.366	1.79271	3.59511e-10	ENSG00000167751	KLK2
15.1888	1.78452	0.0288239	ENSG00000265758	LINC01900
18.7905	1.78244	0.0241156	ENSG00000238220	AP000275,1
41.6449	1.77774	3.27146e-06	ENSG00000073734	ABCB11
18.7758	1.77691	0.0187687	ENSG00000113391	FAM172A
58.7621	1.76395	5.87193e-08	ENSG00000104133	SPG11
186.797	1.75673	1.08791e-19	ENSG00000225827	SFTPA3P
25.4792	1.7547	0.00066782	ENSG00000268970	AC022150,2
387.719	1.74855	1.04571e-21	ENSG00000166478	ZNF143
230.274	1.74719	1.74424e-10	ENSG00000172139	SLC9C1
133.068	1.74096	1.84757e-10	ENSG00000147804	SLC39A4
278.848	1.74016	2.78671e-25	ENSG00000156218	ADAMTSL3
204.596	1.73854	2.89205e-14	ENSG00000048405	ZNF800
16.3778	1.7384	0.00646331	ENSG00000237989	LINC01679
4778.84	1.72469	4.32033e-43	ENSG00000225484	NUTM2B-AS1
25.9999	1.71821	0.00335752	ENSG00000169976	SF3B5
182.568	1.71364	6.4521e-13	ENSG00000264172	PDLIM1P3
20.4985	1.71108	0.00781173	ENSG00000234906	APOC2
759.186	1.71092	2.14379e-26	ENSG00000286938
16.956	1.70994	0.0164939	ENSG00000131482	G6PC
42.5729	1.70452	0.00187967	ENSG00000252582	RF00322
32.4339	1.69809	0.000368907	ENSG00000261519	AC010542,4
23.673	1.69797	0.0064494	ENSG00000287814
38.9031	1.69708	0.000923135	ENSG00000161677	JOSD2
158.792	1.68815	1.98307e-11	ENSG00000172046	USP19
12.3972	1.68623	0.0405812	ENSG00000068366	ACSL4
30.4174	1.68504	0.00456872	ENSG00000162433	AK4
16.6921	1.68343	0.00387324	ENSG00000258654	AC026495,1
69.425	1.67701	9.85644e-06	ENSG00000118523	CTGF
860.003	1.67355	1.81365e-24	ENSG00000064547	LPAR2
543.594	1.67205	2.67816e-31	ENSG00000293513
303.265	1.65408	1.55548e-13	ENSG00000285816
36.5497	1.64977	0.000572798	ENSG00000224738	AC099850,1
32.6459	1.64587	0.00294195	ENSG00000117472	TSPAN1
48.564	1.64373	0.00190937	ENSG00000250727	AC100871,1
39.3954	1.63779	0.00208195	ENSG00000287677
169.463	1.63634	9.98758e-17	ENSG00000262488	AC133065,2
1062.91	1.63468	9.25305e-47	ENSG00000276975	HYDIN2
19.0305	1.63389	0.020195	ENSG00000212978	AC016747,1
30.8909	1.63327	0.00671926	ENSG00000007306	CEACAM7
15.1791	1.63076	0.0394147	ENSG00000196696	AC009022,1
26.4316	1.62826	0.00689545	ENSG00000259010	AL049869,1
347.403	1.62757	1.88022e-25	ENSG00000157349	DDX19B
96.3018	1.62701	4.19105e-08	ENSG00000179165	PXT1
13.4919	1.62678	0.0497469	ENSG00000261121	LINC02473
16.2296	1.62319	0.0144042	ENSG00000268947	AC002128,1
33.4385	1.61848	0.000558168	ENSG00000198478	SH3BGRL2
73.2991	1.61769	3.7289e-06	ENSG00000186678	AL590240,1
537.751	1.61589	3.49119e-21	ENSG00000171812	COL8A2
17.0475	1.61553	0.00740867	ENSG00000289981
116.114	1.61476	1.51013e-08	ENSG00000249861	LGALS16
13.9077	1.60991	0.0248368	ENSG00000204186	ZDBF2
45.2154	1.60812	0.000114142	ENSG00000285082	AL160272,2
227.423	1.60442	2.28381e-14	ENSG00000196951	SCOC-AS1
2289.22	1.60013	7.57512e-33	ENSG00000130165	ELOF1
12.5429	1.59339	0.0203381	ENSG00000126226	PCID2
321.185	1.59181	7.75504e-13	ENSG00000230257	NFE4
390.294	1.59015	2.00863e-22	ENSG00000204754	LINC01951
16.4325	1.58516	0.022424	ENSG00000252988	RNU6-111P
539.595	1.58091	1.49085e-14	ENSG00000133250	ZNF414
14.177	1.57669	0.0130903	ENSG00000236833	AC024560,1
1788.17	1.57233	1.13169e-33	ENSG00000262768	AC100791,2
441.385	1.57198	5.21712e-14	ENSG00000180739	S1PR5
16.6177	1.56815	0.0359255	ENSG00000140743	CDR2
1384.8	1.56695	6.92207e-37	ENSG00000172803	SNX32
400.743	1.56681	1.22267e-19	ENSG00000188505	NCCRP1
64.5994	1.56657	1.05561e-06	ENSG00000221739	MIR1203
476.925	1.56568	7.97999e-20	ENSG00000042286	AIFM2
13.6379	1.56358	0.0393221	ENSG00000055044	NOP58
12.6744	1.55669	0.0224651	ENSG00000186625	KATNA1
32.0239	1.54917	0.00468246	ENSG00000187860	CCDC157
55.4026	1.54603	0.000636421	ENSG00000080618	CPB2
64.6274	1.54545	9.61793e-06	ENSG00000104892	KLC3
101.33	1.53999	1.38164e-07	ENSG00000153563	CD8A
159.127	1.53942	2.13346e-11	ENSG00000215009	ACSM4
183.938	1.53868	9.28853e-17	ENSG00000275305	RNA5SP528
103.243	1.53548	2.02489e-07	ENSG00000261873	SMIM36
119.756	1.52978	1.31919e-12	ENSG00000240863	RN7SL645P
117.842	1.52974	2.84453e-12	ENSG00000204220	PFDN6
439.431	1.52773	1.06852e-16	ENSG00000260488	AC007216,1
13.2671	1.52586	0.0165581	ENSG00000264343	NOTCH2NL
91.4994	1.52425	1.0333e-08	ENSG00000234148	LINC01961
27.9408	1.5199	0.0021582	ENSG00000235934	AC007405,2
53.6771	1.51699	1.87706e-05	ENSG00000237279	AC099677,3
600.357	1.51662	2.4473e-18	ENSG00000290049
73.3855	1.51199	3.65238e-05	ENSG00000293261
594.162	1.51159	6.17854e-25	ENSG00000248905	FMN1
294.006	1.5094	3.22745e-15	ENSG00000168754	FAM178B
12.6491	1.50299	0.0416384	ENSG00000164972	C9orf24
43.3508	1.50194	0.00372545	ENSG00000267638	AC023855,1
64.9744	1.50152	9.37076e-05	ENSG00000290126
99.5877	1.49855	7.89407e-08	ENSG00000083168	KAT6A
95.8792	1.49442	5.07196e-07	ENSG00000236272	Z82214,2
62.6217	1.48793	4.79427e-05	ENSG00000230876	LINC00486
161.184	1.48688	2.56099e-10	ENSG00000100325	ASCC2
24.7531	1.48686	0.0241655	ENSG00000135423	GLS2
171.633	1.48482	3.43155e-10	ENSG00000090339	ICAM1
156.495	1.48368	1.06439e-08	ENSG00000259242	AC002306,1
64.1061	1.48233	0.000409259	ENSG00000115816	CEBPZ
17.0202	1.48178	0.0353241	ENSG00000254949	GNG5P3
18.1179	1.48051	0.0172659	ENSG00000273403	AC107294,3
18.6688	1.47222	0.0110761	ENSG00000249135	AC116347,2
61.0116	1.46973	0.000173191	ENSG00000107443	CCNJ
77.4659	1.46698	6.14974e-06	ENSG00000265902	MIR4696
27.1727	1.46403	0.00546315	ENSG00000271014	AC062037,1
182.764	1.4634	1.07791e-09	ENSG00000248456	LINC02485
106.101	1.46296	6.83947e-10	ENSG00000188559	RALGAPA2
28.6639	1.46033	0.00832835	ENSG00000232290	AL133260,2
265.994	1.45694	1.60011e-12	ENSG00000235720	GABPAP
68.8539	1.45671	0.000900915	ENSG00000207583	MIR606
26.4107	1.45181	0.00566093	ENSG00000264247	LINC00909
168.732	1.44734	1.8084e-06	ENSG00000276988	RF00017
82.1215	1.44733	1.56548e-07	ENSG00000124074	ENKD1
12.7107	1.44575	0.039695	ENSG00000201483	RF00019
519.192	1.44542	5.21263e-20	ENSG00000103415	HMOX2
24.2783	1.44482	0.0205628	ENSG00000171806	METTL18
240.566	1.4435	3.54728e-09	ENSG00000204475	NCR3
62.7599	1.44226	0.00037359	ENSG00000260053	ABCB10P4
91.8477	1.44193	4.53023e-07	ENSG00000006118	TMEM132A
157.056	1.44009	2.26476e-06	ENSG00000260911	AC135050,3
28.4832	1.43238	0.00823355	ENSG00000189190	ZNF600
96.2332	1.43164	0.000126355	ENSG00000155749	ALS2CR12
57.2088	1.43058	0.000468045	ENSG00000140479	PCSK6
690.699	1.42514	7.44746e-17	ENSG00000173517	PEAK1
80.623	1.42019	1.3131e-05	ENSG00000233431	AL359815,1
82.4096	1.42018	2.2301e-07	ENSG00000239388	ASB14
23.43	1.41854	0.00781893	ENSG00000240203	RN7SL567P
156.162	1.41729	2.29409e-08	ENSG00000198286	CARD11
81.9283	1.4154	8.67792e-06	ENSG00000288099
102.974	1.41436	2.54658e-07	ENSG00000137200	CMTR1
328.68	1.41159	1.26831e-09	ENSG00000271969	U47924,1
453.335	1.41046	1.61904e-16	ENSG00000258140	AC127894,1
84.6997	1.41025	0.000520616	ENSG00000171241	SHCBP1
97.2502	1.40792	8.67127e-06	ENSG00000089159	PXN
256.797	1.40726	5.92511e-15	ENSG00000287192
103.039	1.40346	9.63807e-10	ENSG00000291117
114.151	1.40154	2.87747e-08	ENSG00000264112	AC015813,1
21.263	1.40023	0.0268485	ENSG00000248487	ABHD14A
45.6222	1.39971	0.000222941	ENSG00000071082	RPL31
128.27	1.39864	7.9101e-06	ENSG00000159461	AMFR
336.993	1.39715	1.5944e-14	ENSG00000289348
21.2771	1.395	0.0112058	ENSG00000157353	FUK
60.9088	1.38077	0.000619838	ENSG00000239978	OR7E53P
36.4234	1.37997	0.00496611	ENSG00000290917
55.069	1.37834	0.00749957	ENSG00000230832	AC241584,1
104.716	1.37647	9.9099e-06	ENSG00000137133	HINT2
123.482	1.37568	8.59244e-09	ENSG00000004948	CALCR
530.321	1.37526	2.94863e-16	ENSG00000284720	AC117945,2
45.3281	1.3738	0.00122621	ENSG00000207494	RF00019
43.4905	1.37334	0.00166543	ENSG00000234335	RPS4XP11
681.172	1.37115	1.81946e-14	ENSG00000244215	LINC02016
227.878	1.37045	2.17114e-12	ENSG00000182022	CHST15
44.321	1.36844	0.00329277	ENSG00000204148	LINC00474
110.99	1.3665	1.7407e-07	ENSG00000136758	YME1L1
30.5037	1.3654	0.0184897	ENSG00000133083	DCLK1
72.707	1.35506	0.000413775	ENSG00000162630	B3GALT2
34.7988	1.35377	0.00208464	ENSG00000150977	RILPL2
53.7748	1.35123	9.672e-05	ENSG00000267395	DM1-AS
33.327	1.3493	0.0133995	ENSG00000204021	LIPK
182.898	1.34607	5.93299e-08	ENSG00000012232	EXTL3
68.7723	1.34552	0.00047364	ENSG00000163347	CLDN1
499.96	1.34536	5.87737e-17	ENSG00000203705	TATDN3
153.26	1.34491	4.63711e-06	ENSG00000225971	AC003071,1
39.4591	1.34218	0.00902947	ENSG00000196381	ZNF781
19.1454	1.34135	0.0153465	ENSG00000289415
30.1323	1.3401	0.00313949	ENSG00000090621	PABPC4
39.5318	1.33928	0.000484457	ENSG00000104976	SNAPC2
63.0612	1.33727	0.00016341	ENSG00000279123	AC027281,2
287.707	1.33557	2.81025e-12	ENSG00000204564	C6orf136
89.8843	1.33524	0.000838019	ENSG00000280327	Z97633,1
58.9672	1.33298	0.000469616	ENSG00000182628	SKA2
295.923	1.33165	2.32593e-07	ENSG00000186314	PRELID2
37.5577	1.33128	0.0097711	ENSG00000231105	AL031728,1
37.9454	1.32958	0.000241195	ENSG00000213799	ZNF845
1689.3	1.32822	2.08988e-18	ENSG00000089639	GMIP
17.3831	1.3258	0.0144405	ENSG00000166228	PCBD1
45.039	1.32416	0.000190121	ENSG00000289292
267.024	1.32123	1.19108e-11	ENSG00000290422
423.054	1.31754	3.0349e-08	ENSG00000111145	ELK3
29.7476	1.31719	0.0275201	ENSG00000101000	PROCR
13.38	1.31548	0.0362554	ENSG00000270604	HCG17
18.1988	1.31454	0.0266835	ENSG00000282301	CYP3A7-CYP3A51P
68.4952	1.31186	5.78142e-05	ENSG00000267065	LINC02080
54.6264	1.3111	0.000505605	ENSG00000036565	SLC18A1
31.2353	1.31004	0.00720248	ENSG00000258481	AL133240,1
18.2294	1.30999	0.0230168	ENSG00000166813	KIF7
91.9603	1.3098	1.38974e-07	ENSG00000226397	C12orf77
50.5394	1.30846	0.000958006	ENSG00000081721	DUSP12
18.2657	1.30752	0.0169029	ENSG00000223959	AFG3L1P
103.043	1.30641	0.00293929	ENSG00000270061	AC068790,5
28.2934	1.30514	0.0181485	ENSG00000239556	AC004951,2
52.9247	1.30439	0.000140037	ENSG00000153283	CD96
42.6808	1.30203	0.00194909	ENSG00000235819	AL158828,1
110.693	1.30118	2.04925e-08	ENSG00000143437	ARNT
20.469	1.29962	0.0356441	ENSG00000169026	SLC49A3
33.7878	1.29852	0.00150086	ENSG00000106803	SEC61B
240.977	1.29316	9.37253e-13	ENSG00000165943	MOAP1
208.941	1.29263	1.20563e-08	ENSG00000138642	HERC6
379.808	1.29132	6.61246e-19	ENSG00000115207	GTF3C2
20.6618	1.29078	0.0224452	ENSG00000181201	HIST3H2BA
35.8587	1.28855	0.00246204	ENSG00000254871	AC024475,2
46.3828	1.28844	0.00137047	ENSG00000132405	TBC1D14
138.684	1.28679	9.6811e-08	ENSG00000144843	ADPRH
1731.45	1.28541	1.82067e-28	ENSG00000234719	NPIPB2
41.9977	1.28463	0.00968453	ENSG00000269069	AC007842,1
108.726	1.28267	6.61364e-05	ENSG00000170425	ADORA2B
42.3281	1.28223	0.030383	ENSG00000103319	EEF2K
91.8921	1.28193	5.74275e-07	ENSG00000288598
313.696	1.28048	5.38037e-20	ENSG00000215277	RNF212B
47.234	1.27763	0.000534915	ENSG00000274098	RN7SL787P
44.9323	1.27757	0.00532368	ENSG00000233872	AC005033,1
77.2909	1.27625	0.000270789	ENSG00000164900	GBX1
1569.05	1.27146	1.15077e-13	ENSG00000226251	AL451060,1
47.9355	1.26971	0.00695796	ENSG00000261485	PAN3-AS1
136.573	1.26818	9.9699e-07	ENSG00000090905	TNRC6A
334.288	1.26718	6.15777e-12	ENSG00000237833	AL391380,1
93.2156	1.26449	5.17833e-06	ENSG00000109475	RPL34
279.42	1.26387	1.1594e-10	ENSG00000189051	RNF222
23.791	1.26343	0.0325123	ENSG00000071242	RPS6KA2
474.727	1.26268	2.6228e-15	ENSG00000148297	MED22
127.073	1.26191	6.28716e-05	ENSG00000287001
213.428	1.26115	2.53729e-08	ENSG00000059758	CDK17
107.355	1.26105	5.59371e-07	ENSG00000243789	JMJD7
512.903	1.26062	1.60001e-10	ENSG00000026508	CD44
34.5618	1.2606	0.0013993	ENSG00000158019	BABAM2
46.5025	1.26045	0.0172763	ENSG00000236810	ELOA-AS1
4453.73	1.25684	1.04909e-13	ENSG00000173083	HPSE
273.712	1.25488	7.38585e-09	ENSG00000273002	AL355388,2
113.638	1.25239	2.47664e-07	ENSG00000234389	AC007278,1
92.7925	1.2518	1.04155e-05	ENSG00000136811	ODF2
23.3734	1.25054	0.0353862	ENSG00000149651	SPINT4
99.2566	1.24954	1.46959e-05	ENSG00000120333	MRPS14
232.201	1.24953	7.96549e-12	ENSG00000179071	CCDC89
448.16	1.24945	1.23988e-19	ENSG00000089169	RPH3A
217.293	1.24767	4.11024e-08	ENSG00000154917	RAB6B
113.368	1.24468	1.86677e-05	ENSG00000146426	TIAM2
21.5242	1.24364	0.0237376	ENSG00000238131	AC073521,1
49.3856	1.24264	0.00113719	ENSG00000070669	ASNS
49.4386	1.24134	0.00295707	ENSG00000144681	STAC
116.073	1.24092	6.89401e-05	ENSG00000196407	THEM5
56.2876	1.24072	0.00484284	ENSG00000263887	AC053481,2
31.9094	1.23765	0.00400359	ENSG00000289622
278.376	1.23447	2.05701e-09	ENSG00000164574	GALNT10
228.509	1.23172	1.40579e-11	ENSG00000197150	ABCB8
69.2796	1.23168	0.000232362	ENSG00000132842	AP3B1
409.613	1.23053	2.29772e-19	ENSG00000116690	PRG4
609.411	1.23036	1.77324e-14	ENSG00000204590	GNL1
32.8159	1.2292	0.020399	ENSG00000271220	AL355376,2
150.37	1.22686	4.53349e-07	ENSG00000276409	CCL14
244.387	1.22535	4.55211e-11	ENSG00000205832	C16orf96
287.453	1.2222	1.53887e-10	ENSG00000105705	SUGP1
13.9409	1.22089	0.0438158	ENSG00000206559	ZCWPW2
250.92	1.21835	3.29014e-09	ENSG00000100105	PATZ1
71.0882	1.21781	0.000276939	ENSG00000144451	SPAG16
64.68	1.21769	0.00676033	ENSG00000016864	GLT8D1
70.7182	1.21732	2.49022e-05	ENSG00000167380	ZNF226
349.038	1.21645	4.24123e-13	ENSG00000285560
588.914	1.21386	1.30361e-18	ENSG00000268403	AC132192,2
147.301	1.21324	1.16546e-06	ENSG00000163736	PPBP
32.7653	1.21034	0.00947897	ENSG00000227399	AL391219,1
49.0895	1.20872	0.000429163	ENSG00000131183	SLC34A1
188.661	1.20692	2.05441e-07	ENSG00000257114	LINC02450
103.834	1.20597	1.11971e-05	ENSG00000274532	AC091304,6
68.0464	1.20536	0.0013284	ENSG00000112511	PHF1
87.3326	1.20516	3.96014e-06	ENSG00000264734	AC069061,2
21.752	1.20455	0.0337385	ENSG00000163935	SFMBT1
149.396	1.20345	1.32597e-07	ENSG00000165630	PRPF18
52.0961	1.20187	0.00265728	ENSG00000204610	TRIM15
89.6833	1.20125	2.86432e-05	ENSG00000264968	AC090844,2
51.783	1.19827	0.00220375	ENSG00000230872	MFSD13B
67.5616	1.19704	0.000350661	ENSG00000138600	SPPL2A
120.666	1.19618	2.7822e-07	ENSG00000100418	DESI1
153.897	1.19612	2.25717e-05	ENSG00000236305	SLC12A9-AS1
40.8944	1.19604	0.00402841	ENSG00000108001	EBF3
1022.46	1.19468	1.59951e-25	ENSG00000134247	PTGFRN
80.8754	1.19401	8.9772e-05	ENSG00000151893	CACUL1
549.493	1.19259	1.75305e-10	ENSG00000110756	HPS5
400.048	1.19255	1.58956e-11	ENSG00000062598	ELMO2
228.255	1.19132	1.63116e-08	ENSG00000198901	PRC1
28.79	1.19126	0.00538931	ENSG00000269387	AL365205,3
1252.57	1.18976	2.92547e-36	ENSG00000130164	LDLR
1117.13	1.18118	1.89195e-20	ENSG00000181852	RNF41
118.321	1.18111	0.00136912	ENSG00000250334	LINC00989
112.961	1.18024	2.75347e-05	ENSG00000236849	LINC01474
208.573	1.18014	1.13334e-07	ENSG00000175334	BANF1
48.7927	1.1797	0.019614	ENSG00000264115	MIR3180-4
18.5212	1.1773	0.0289916	ENSG00000184571	PIWIL3
48.7351	1.17578	0.00337769	ENSG00000289108
19.8991	1.17577	0.0255285	ENSG00000144130	NT5DC4
523.344	1.17485	5.45127e-12	ENSG00000268869	ESPNP
79.7705	1.17425	6.75097e-05	ENSG00000116885	OSCP1
2619.68	1.17202	9.09405e-16	ENSG00000232746	LINC02022
49.7925	1.17186	0.0104599	ENSG00000257987	TEX49
104.71	1.17154	3.24067e-05	ENSG00000184271	POU6F1
224.502	1.17069	2.54562e-07	ENSG00000125977	EIF2S2
68.5922	1.16981	9.92566e-05	ENSG00000079332	SAR1A
113.989	1.16808	0.000125548	ENSG00000274044	LINC01660
79.9247	1.16739	0.000402819	ENSG00000251548	AC106760,2
747.119	1.16378	2.77765e-08	ENSG00000126464	PRR12
208.236	1.16318	4.60769e-12	ENSG00000261624	NDUFB10P2
3867.44	1.16134	5.18923e-07	ENSG00000103490	PYCARD
44.627	1.15848	0.00202175	ENSG00000121671	CRY2
81.8007	1.15811	0.00071397	ENSG00000286978
116.63	1.15614	1.50853e-06	ENSG00000130119	GNL3L
46.8602	1.1556	0.00799126	ENSG00000264622	AC022903,1
1024.87	1.1555	1.24657e-22	ENSG00000136213	CHST12
60.2171	1.15248	0.00271842	ENSG00000279689	AC022400,8
286.789	1.15226	3.1169e-08	ENSG00000180198	RCC1
206.927	1.15165	3.08609e-05	ENSG00000197891	SLC22A12
380.018	1.15164	1.97992e-18	ENSG00000264791	AC004147,3
44.2897	1.15029	0.00217947	ENSG00000235421	AC114501,2
38.0362	1.15002	0.00431484	ENSG00000226491	FTOP1
37.6614	1.14978	0.0313251	ENSG00000188269	OR7A5
108.79	1.14939	6.77149e-05	ENSG00000239719	AC004890,1
358.766	1.14815	6.27742e-10	ENSG00000108384	RAD51C
52.2681	1.1478	0.0025285	ENSG00000140368	PSTPIP1
29.4408	1.14672	0.0334366	ENSG00000243449	C4orf48
79.0626	1.1463	0.000370631	ENSG00000130402	ACTN4
27.7748	1.14547	0.00941381	ENSG00000123992	DNPEP
222.296	1.14366	2.54047e-06	ENSG00000089199	CHGB
76.9583	1.14173	0.000700321	ENSG00000254428	AP003392,1
212.044	1.14124	2.52802e-10	ENSG00000023572	GLRX2
1213.42	1.13865	1.78529e-14	ENSG00000158423	RIBC1
287.379	1.13798	1.53621e-05	ENSG00000243710	CFAP57
39.9571	1.13641	0.0103839	ENSG00000187242	KRT12
99.2781	1.13631	0.000157545	ENSG00000186184	POLR1D
196.118	1.13566	2.4233e-07	ENSG00000173473	SMARCC1
157.289	1.13305	8.09381e-07	ENSG00000075702	WDR62
109.46	1.13285	9.81732e-06	ENSG00000114302	PRKAR2A
35.5651	1.13056	0.00538829	ENSG00000213770	FAM210CP
199.492	1.13028	1.82621e-05	ENSG00000180044	C3orf80
177.716	1.13014	1.02925e-06	ENSG00000255571	MIR9-3HG
446.927	1.12946	1.69811e-12	ENSG00000010244	ZNF207
342.748	1.12926	2.91832e-08	ENSG00000157978	LDLRAP1
732.875	1.12839	1.44544e-10	ENSG00000161405	IKZF3
99.0417	1.12731	3.60149e-05	ENSG00000243020	RPL7P39
205.233	1.12204	1.13183e-05	ENSG00000267060	PTGES3L
49.1441	1.12173	0.0105431	ENSG00000105568	PPP2R1A
1426.09	1.12115	6.59127e-34	ENSG00000053108	FSTL4
82.8996	1.11762	0.000117377	ENSG00000131059	BPIFA3
66.7439	1.11723	0.000289271	ENSG00000184983	NDUFA6
62.773	1.11606	0.0014653	ENSG00000135457	TFCP2
441.638	1.11379	1.98948e-12	ENSG00000077942	FBLN1
32.2451	1.1133	0.0323217	ENSG00000288563
107.902	1.1118	0.00051976	ENSG00000252534	RF00019
66.4778	1.11051	0.00197999	ENSG00000267076	CCDC58P3
94.6412	1.11042	0.00199697	ENSG00000250682	LINC00491
30.6387	1.10966	0.020357	ENSG00000185662	SMIM23
189.033	1.10944	8.59522e-08	ENSG00000171928	TVP23B
258.286	1.10853	6.71007e-13	ENSG00000147044	CASK
2304.63	1.10841	5.46479e-12	ENSG00000120903	CHRNA2
114.352	1.10704	0.000279538	ENSG00000081148	IMPG2
534.21	1.1051	1.42125e-11	ENSG00000147133	TAF1
26.7538	1.10475	0.0134409	ENSG00000283583	AC007326,4
43.8053	1.10307	0.00543385	ENSG00000244055	AC007566,1
159.88	1.1027	2.59033e-05	ENSG00000293508
38.0114	1.10146	0.00624905	ENSG00000235156	TMEM30CP
1845.96	1.10126	2.03384e-12	ENSG00000172757	CFL1
21.1798	1.10061	0.0293241	ENSG00000259605	AC074212,1
85.5864	1.10053	5.03598e-05	ENSG00000235875	ARHGEF7-AS2
30.5776	1.09651	0.00987347	ENSG00000111885	MAN1A1
68.3238	1.09636	0.00173223	ENSG00000160446	ZDHHC12
37.8641	1.09553	0.0299186	ENSG00000289164
58.8354	1.09549	0.00581697	ENSG00000279069	AC015813,5
55.1693	1.09384	0.000443946	ENSG00000066248	NGEF
52.6272	1.09218	0.0115344	ENSG00000084731	KIF3C
45.5013	1.09216	0.0190216	ENSG00000258616	LINC02303
918.82	1.09212	4.35192e-19	ENSG00000008130	NADK
56.5028	1.09182	0.00302542	ENSG00000199894	RF00494
93.2478	1.08718	0.00148607	ENSG00000237360	CHCHD4P2
58.3146	1.08662	0.00458214	ENSG00000108370	RGS9
568.76	1.08639	1.7654e-08	ENSG00000177646	ACAD9
841.589	1.08535	7.71283e-08	ENSG00000173581	CCDC106
30.2223	1.0842	0.00719884	ENSG00000269981	AL627309,7
686.936	1.08394	1.36207e-10	ENSG00000107164	FUBP3
133.271	1.07981	0.000286841	ENSG00000239576	COX6CP14
138.561	1.07892	3.39366e-05	ENSG00000055957	ITIH1
130.288	1.07657	0.00111556	ENSG00000160654	CD3G
313.196	1.07519	1.74064e-09	ENSG00000165487	MICU2
23.3439	1.073	0.037803	ENSG00000170836	PPM1D
55.6235	1.07171	0.00560194	ENSG00000279770	LINC00552
195.113	1.07066	1.48704e-07	ENSG00000075240	GRAMD4
243.227	1.06954	6.0244e-05	ENSG00000174437	ATP2A2
190.476	1.06808	3.27348e-09	ENSG00000181894	ZNF329
745.941	1.06764	2.83338e-19	ENSG00000214432	VPS33B-DT
1676.66	1.06708	1.65532e-13	ENSG00000070081	NUCB2
21.188	1.06687	0.0394907	ENSG00000288612
128.905	1.06578	4.79697e-06	ENSG00000231827	AL513523,2
53.0813	1.06553	0.0089049	ENSG00000258760	AL355076,2
167.042	1.06546	2.94835e-06	ENSG00000229102	AC076966,1
27.4306	1.0649	0.0261466	ENSG00000277210	AC090164,3
417.521	1.06475	1.26745e-09	ENSG00000248265	AC023794,1
62.8936	1.06434	0.00186867	ENSG00000167676	PLIN4
41.0295	1.06368	0.00515896	ENSG00000163577	EIF5A2
51.3885	1.05988	0.00521081	ENSG00000221340	RNU6ATAC18P
35.0967	1.05796	0.0193783	ENSG00000177427	MIEF2
34.4609	1.05728	0.0414823	ENSG00000172530	BANP
42.9668	1.05537	0.0363319	ENSG00000206980	RNU6-662P
96.3254	1.05505	0.0023914	ENSG00000100156	SLC16A8
132.008	1.05481	7.04571e-05	ENSG00000234284	ZNF879
246.496	1.05423	2.5935e-06	ENSG00000279085	AL022323,3
174.13	1.05178	8.29117e-07	ENSG00000290960
75.1679	1.05174	0.00197648	ENSG00000187094	CCK
92.4734	1.05165	0.000622704	ENSG00000146112	PPP1R18
316.461	1.05125	5.62234e-09	ENSG00000197993	KEL
298.152	1.04837	2.66401e-10	ENSG00000082458	DLG3
38.849	1.04789	0.0123909	ENSG00000122026	RPL21
246.794	1.04783	3.48622e-06	ENSG00000255874	LINC00346
176.386	1.04778	9.48964e-06	ENSG00000184207	PGP
90.6083	1.0473	4.22168e-05	ENSG00000083799	CYLD
22.5742	1.04539	0.0337033	ENSG00000138279	ANXA7
531.318	1.04509	6.60643e-07	ENSG00000149499	EML3
769.052	1.04491	2.8148e-12	ENSG00000126351	THRA
28.7184	1.04307	0.0215447	ENSG00000117215	PLA2G2D
444.293	1.04228	3.18616e-11	ENSG00000263571	AC004147,2
98.6162	1.0422	0.00204321	ENSG00000269758	AC092070,4
90.0965	1.04175	0.00218252	ENSG00000136859	ANGPTL2
45.5902	1.03946	0.0107336	ENSG00000171566	PLRG1
150.875	1.03939	9.92848e-06	ENSG00000286114
87.381	1.03803	0.00163413	ENSG00000289157
109.477	1.03745	3.76412e-05	ENSG00000251533	LINC00605
38.4688	1.03704	0.0157202	ENSG00000248564	AC079140,1
33.7243	1.037	0.0156117	ENSG00000105393	BABAM1
4539.47	1.03545	3.46885e-16	ENSG00000060642	PIGV
58.2175	1.0339	0.00118014	ENSG00000166762	CATSPER2
85.8433	1.03322	0.000140795	ENSG00000140848	CPNE2
295.042	1.03307	5.17534e-10	ENSG00000285559
71.3669	1.03219	0.00934955	ENSG00000122008	POLK
134.092	1.02891	6.35447e-05	ENSG00000154065	ANKRD29
67.1495	1.0279	0.00189911	ENSG00000251046	ZNF969P
73.9536	1.02706	0.00160163	ENSG00000287037
596.289	1.02583	4.36814e-07	ENSG00000144583	MARCH4
96.7269	1.0252	0.000279153	ENSG00000185651	UBE2L3
2154.17	1.02419	1.50629e-14	ENSG00000170374	SP7
84.3826	1.02266	0.00616781	ENSG00000221983	UBA52
49.9018	1.02166	0.00405775	ENSG00000265247	MIR4472-1
106.519	1.02122	2.11935e-06	ENSG00000120699	EXOSC8
82.636	1.02111	0.00200592	ENSG00000065328	MCM10
6799.02	1.02067	9.94148e-13	ENSG00000293494
165.394	1.01906	1.21035e-05	ENSG00000246211	P4HA3-AS1
187.754	1.01823	7.01256e-06	ENSG00000162592	CCDC27
431.77	1.0169	6.94215e-09	ENSG00000277270	AL160412,1
37.4143	1.01665	0.0228928	ENSG00000126460	PRRG2
137.017	1.01552	4.27847e-05	ENSG00000172037	LAMB2
345.018	1.01541	2.1943e-07	ENSG00000149636	DSN1
86.5672	1.01447	0.00117621	ENSG00000255666	AP000943,2
116.378	1.01313	3.0044e-05	ENSG00000146963	LUC7L2
109.653	1.01312	2.47486e-05	ENSG00000246273	SBF2-AS1
300.275	1.0125	2.30456e-06	ENSG00000118363	SPCS2
63.581	1.01156	0.00245952	ENSG00000259198	AC020658,2
169.405	1.01136	0.000248176	ENSG00000173930	SLCO4C1
30.6789	1.01018	0.0493197	ENSG00000126500	FLRT1
36.7752	1.00952	0.0485655	ENSG00000168906	MAT2A
163.02	1.00764	6.90508e-06	ENSG00000213640	EEF1DP4
42.5128	1.00524	0.0324421	ENSG00000057608	GDI2
271.039	1.00488	6.25025e-09	ENSG00000140694	PARN
138.807	1.00292	0.000277656	ENSG00000138735	PDE5A
557.697	1.00213	3.74725e-11	ENSG00000160145	KALRN
1151.08	1.00205	8.07866e-15	ENSG00000101868	POLA1
108.91	1.00064	0.00457836	ENSG00000204277	LINC01993
686.328	1.00048	1.9695e-13	ENSG00000196476	C20orf96
586.016	0.99991	2.3259e-08	ENSG00000166326	TRIM44
43.9716	0.998699	0.010588	ENSG00000248126	AC091849,1
272.588	0.99798	1.33496e-07	ENSG00000156395	SORCS3
6028.51	0.997958	3.3007e-16	ENSG00000278540	ACACA
209.665	0.997712	2.18975e-06	ENSG00000249085	AC035140,1
499.654	0.997563	4.93854e-08	ENSG00000089127	OAS1
70.5601	0.997397	0.00101134	ENSG00000233603	JTBP1
77.2492	0.996251	0.00252122	ENSG00000132854	KANK4
401.856	0.99581	1.23804e-07	ENSG00000167553	TUBA1C
56.6682	0.99565	0.00634387	ENSG00000201846	RNA5SP166
126.425	0.995562	0.000979607	ENSG00000100139	MICALL1
143.342	0.994998	9.53912e-05	ENSG00000205116	TMEM88B
162.058	0.994929	1.16276e-05	ENSG00000287807
173.222	0.994847	1.01408e-05	ENSG00000162139	NEU3
53.5555	0.994843	0.0131568	ENSG00000091106	NLRC4
28.9228	0.992036	0.0203617	ENSG00000167969	ECI1
143.379	0.991754	2.19492e-05	ENSG00000235695	AC130472,1
10259.9	0.990593	2.80892e-05	ENSG00000152284	TCF7L1
871.067	0.989974	1.02174e-12	ENSG00000166860	ZBTB39
104.771	0.988862	0.00716774	ENSG00000187147	RNF220
102.202	0.988332	0.00136595	ENSG00000005381	MPO
122.358	0.988174	1.24383e-05	ENSG00000166091	CMTM5
580.793	0.986381	1.58716e-10	ENSG00000103018	CYB5B
59.6087	0.985131	0.0145597	ENSG00000291144
82.4704	0.985067	0.00269139	ENSG00000268575	AL031282,2
2254.5	0.98455	3.23898e-15	ENSG00000104870	FCGRT
64.4916	0.984265	0.00935529	ENSG00000287093
79.1594	0.982935	0.0154499	ENSG00000230803	AC097532,1
42.8644	0.982392	0.0198932	ENSG00000231628	AL133406,2
116.674	0.981472	0.00419707	ENSG00000260460	AL365181,1
113.549	0.980667	0.000713398	ENSG00000285796
349.02	0.980151	7.23134e-10	ENSG00000105612	DNASE2
110.101	0.979837	0.00336547	ENSG00000273015	AC008124,1
92.7221	0.978993	0.00158984	ENSG00000267327	AC009271,1
51.8529	0.978196	0.0203426	ENSG00000265096	C1QTNF1-AS1
265.992	0.976833	4.83628e-07	ENSG00000188778	ADRB3
207.542	0.975214	7.01382e-05	ENSG00000166579	NDEL1
500.426	0.973849	3.68006e-09	ENSG00000178988	MRFAP1L1
165.996	0.973506	0.000133888	ENSG00000139154	AEBP2
59.322	0.97337	0.00138673	ENSG00000266094	RASSF5
20.7229	0.972613	0.0408611	ENSG00000231169	EEF1B2P1
298.966	0.972288	2.53111e-06	ENSG00000196735	HLA-DQA1
89.7658	0.971392	0.00350518	ENSG00000197165	SULT1A2
324.218	0.970075	5.53043e-07	ENSG00000105072	C19orf44
280.787	0.966076	3.5663e-05	ENSG00000224511	LINC00365
42.8313	0.963549	0.0377404	ENSG00000232173	OR2H5P
36.1064	0.960358	0.0374851	ENSG00000255670	AC007619,1
39.9746	0.958941	0.0326152	ENSG00000010256	UQCRC1
79.1257	0.95717	0.0174837	ENSG00000165929	TC2N
31.8381	0.954957	0.0296014	ENSG00000224383	PRR29
57.4234	0.954548	0.00880443	ENSG00000167562	ZNF701
67.9435	0.953366	0.00488974	ENSG00000273913	RF00017
138.314	0.952071	0.000557099	ENSG00000261055	AL450468,2
58.2594	0.951869	0.00304302	ENSG00000251364	AC107884,1
63.1695	0.950869	0.00725635	ENSG00000221933	OR2A25
92.3327	0.950165	0.00258968	ENSG00000187556	NANOS3
184.916	0.94899	0.000122774	ENSG00000257302	FAHD2P1
914.075	0.948319	1.09327e-09	ENSG00000078246	TULP3
33.3748	0.947505	0.0203458	ENSG00000271499	AC011477,6
99.3224	0.947307	0.00306074	ENSG00000180628	PCGF5
157.782	0.947035	1.34969e-07	ENSG00000136891	TEX10
209.317	0.946778	0.000736583	ENSG00000198218	QRICH1
41.3969	0.945463	0.0216834	ENSG00000266760	MIR4464
37.8989	0.945251	0.0193214	ENSG00000213199	ASIC3
73.0486	0.94378	0.00109341	ENSG00000287110
194.783	0.943572	1.19173e-05	ENSG00000279587	AC006963,1
58.4358	0.943201	0.00206603	ENSG00000196357	ZNF565
193.498	0.941342	0.000219953	ENSG00000259236	GOLGA8VP
147.267	0.934894	0.00627151	ENSG00000175985	PLEKHD1
186.533	0.934631	1.33298e-05	ENSG00000292435
417.476	0.934098	8.99166e-07	ENSG00000258345	AC034102,7
212.588	0.933444	3.35135e-05	ENSG00000283526	PRRT1B
1469.02	0.933249	8.03412e-12	ENSG00000156958	GALK2
736.766	0.933038	3.56433e-14	ENSG00000105327	BBC3
299.522	0.931567	5.13081e-06	ENSG00000142599	RERE
109.679	0.930582	0.00122344	ENSG00000141127	PRPSAP2
927.127	0.930354	1.28719e-09	ENSG00000287061
117.88	0.928987	0.000277427	ENSG00000277501	AC243571,2
344.919	0.927964	0.000622115	ENSG00000293352
712.48	0.927472	1.33845e-13	ENSG00000169446	MMGT1
726.785	0.926905	2.85161e-16	ENSG00000141564	RPTOR
505.431	0.926546	4.10997e-08	ENSG00000289236
35.5814	0.926545	0.00950875	ENSG00000169020	ATP5ME
304.822	0.925816	3.25379e-08	ENSG00000106113	CRHR2
49.9325	0.920488	0.0130846	ENSG00000286877
155.291	0.919921	0.000148238	ENSG00000070759	TESK2
582.337	0.919857	1.14271e-07	ENSG00000229051	LINC01788
38.5131	0.919191	0.0356416	ENSG00000091972	CD200
107.354	0.919114	0.0229835	ENSG00000214967	NPIPA7
406.858	0.919086	4.90635e-11	ENSG00000185800	DMWD
75.7539	0.918512	0.00165688	ENSG00000218857	AL137222,1
238.762	0.917896	4.28639e-08	ENSG00000264920	AC018521,5
128.375	0.917797	0.000815545	ENSG00000167634	NLRP7
4212.54	0.917728	7.20777e-05	ENSG00000179010	MRFAP1
55.0274	0.916861	0.00879725	ENSG00000114026	OGG1
139.376	0.91605	0.000414857	ENSG00000251034	AC037459,2
74.1804	0.915756	0.00111798	ENSG00000290047
80.9604	0.914538	0.00423641	ENSG00000274925	AC008741,2
46.1108	0.914432	0.0488699	ENSG00000263017	AC036164,1
74.5641	0.914368	0.00319252	ENSG00000226709	FGF12-AS3
52.9378	0.914269	0.0112367	ENSG00000253407	AC087341,1
907.038	0.913867	1.80589e-10	ENSG00000161888	SPC24
75.0949	0.913603	0.00478736	ENSG00000223806	LINC00114
95.0484	0.911368	0.00244584	ENSG00000113578	FGF1
673.744	0.908826	1.71661e-08	ENSG00000267534	S1PR2
68.1288	0.908795	0.0223313	ENSG00000089048	ESF1
228.351	0.908221	4.94321e-05	ENSG00000148468	FAM171A1
41.0548	0.905696	0.0287358	ENSG00000088970	KIZ
135.543	0.904612	1.60313e-05	ENSG00000170345	FOS
249.109	0.903548	3.52395e-05	ENSG00000163597	SNHG16
288.367	0.902798	2.15854e-07	ENSG00000115866	DARS
38.1447	0.90134	0.0411093	ENSG00000274414	AL121772,1
42.4853	0.900586	0.0121787	ENSG00000177337	DLGAP1-AS1
210.246	0.899361	0.000928635	ENSG00000224417	AL606970,1
168.236	0.899186	0.000138273	ENSG00000125970	RALY
119.027	0.897566	0.000619056	ENSG00000204928	GRXCR2
166.028	0.897301	0.000407343	ENSG00000290934
479.046	0.896299	1.50371e-08	ENSG00000130720	FIBCD1
356.611	0.895928	0.000707419	ENSG00000139343	SNRPF
89.0577	0.895412	0.00492965	ENSG00000084754	HADHA
47.4473	0.895222	0.0106547	ENSG00000174292	TNK1
95.0109	0.894763	0.00360182	ENSG00000284735	AL139424,3
402.73	0.894673	9.13039e-11	ENSG00000090863	GLG1
61.5242	0.894283	0.00678715	ENSG00000112299	VNN1
98.5995	0.8928	0.00328933	ENSG00000279901	AC092117,2
225.266	0.892253	4.11053e-07	ENSG00000150991	UBC
276.562	0.89157	2.96244e-05	ENSG00000115468	EFHD1
49.3796	0.890324	0.0486193	ENSG00000288717
64.558	0.889915	0.00734679	ENSG00000165623	UCMA
210.421	0.889506	0.00549888	ENSG00000089692	LAG3
60.7161	0.889278	0.002861	ENSG00000116035	VAX2
52.6213	0.887805	0.0189972	ENSG00000286722
45.561	0.886857	0.019377	ENSG00000128040	SPINK2
505.305	0.885557	3.65305e-12	ENSG00000176495	OR5AN1
192.961	0.885471	3.56904e-06	ENSG00000162430	SELENON
32.424	0.885398	0.0417835	ENSG00000225781	OR6V1
249.883	0.885127	6.31654e-05	ENSG00000279182	CR559946,2
63.4353	0.883128	0.00474893	ENSG00000188032	C19orf67
182.134	0.882622	0.000104767	ENSG00000279996	AC004491,1
89.6827	0.881345	0.000638649	ENSG00000284977	AL160272,1
218.778	0.880948	2.11088e-06	ENSG00000173933	RBM4
41.5089	0.880667	0.0231471	ENSG00000215388	ACTG1P3
537.377	0.879376	8.54355e-10	ENSG00000204613	TRIM10
56.3784	0.8788	0.0316729	ENSG00000101457	DNTTIP1
56.0259	0.878713	0.0104177	ENSG00000248749	AC104063,1
45.6766	0.877416	0.0376283	ENSG00000240074	RPL9P30
71.7381	0.877401	0.0119432	ENSG00000273540	AGBL1
72.023	0.877325	0.0172755	ENSG00000124496	TRERF1
69.5255	0.876988	0.00372348	ENSG00000290691
1274	0.87669	2.07098e-24	ENSG00000186792	HYAL3
61.3219	0.876299	0.00972604	ENSG00000258375	AC079363,1
50.8567	0.875417	0.0290474	ENSG00000263680	AC007639,1
122.485	0.87526	5.86595e-05	ENSG00000175063	UBE2C
868.118	0.874945	2.87844e-10	ENSG00000276170	AC244153,1
2781.79	0.874542	6.28141e-13	ENSG00000160392	C19orf47
2781.04	0.873971	6.52946e-15	ENSG00000114654	EFCC1
95.9545	0.873403	0.00329601	ENSG00000237312	AL590867,3
187.66	0.871866	1.1832e-05	ENSG00000272338	AC067838,1
99.2416	0.871455	0.00135072	ENSG00000118640	VAMP8
1303	0.871258	1.26341e-24	ENSG00000174238	PITPNA
57.4109	0.870978	0.0202443	ENSG00000285579
50.4886	0.869867	0.021812	ENSG00000136560	TANK
105.136	0.868204	0.00263496	ENSG00000279903	AP006248,3
293.382	0.867946	3.07057e-06	ENSG00000255008	AP000442,1
332.06	0.867924	1.53026e-06	ENSG00000287254
94.8428	0.867921	0.00914418	ENSG00000169967	MAP3K2
256.578	0.867572	1.20034e-07	ENSG00000254867	AP006287,1
847.088	0.866998	1.70504e-08	ENSG00000140505	CYP1A2
44.8575	0.866956	0.0337946	ENSG00000006128	TAC1
63.8885	0.866423	0.0296115	ENSG00000270087	AC010997,3
111.807	0.866247	0.0077331	ENSG00000184497	TMEM255B
1826	0.866225	1.73929e-21	ENSG00000125485	DDX31
465.97	0.865357	4.91324e-06	ENSG00000237323	AC245036,3
250.655	0.865229	1.03276e-06	ENSG00000103056	SMPD3
1287.12	0.864888	8.39239e-13	ENSG00000144535	DIS3L2
104.342	0.863701	0.0161312	ENSG00000064933	PMS1
2089.01	0.863304	1.03356e-08	ENSG00000102302	FGD1
106.265	0.863283	0.00195903	ENSG00000224721	AC007182,1
68.7841	0.862629	0.0194797	ENSG00000132004	FBXW9
249.833	0.862512	0.00132401	ENSG00000100815	TRIP11
46.3346	0.862436	0.0336375	ENSG00000144560	VGLL4
827.147	0.861757	1.1401e-15	ENSG00000012822	CALCOCO1
87.6064	0.859662	0.0107737	ENSG00000104894	CD37
3661.23	0.859023	4.75103e-15	ENSG00000087116	ADAMTS2
42.7533	0.858571	0.0450757	ENSG00000204856	FAM216A
37.1561	0.857955	0.0392421	ENSG00000213925	NPM1P33
294.473	0.857922	2.0424e-06	ENSG00000228559	AL033519,3
190.311	0.856908	4.72395e-06	ENSG00000168884	TNIP2
304.352	0.855654	3.41969e-08	ENSG00000174307	PHLDA3
94.9663	0.855541	0.00209142	ENSG00000115145	STAM2
107.342	0.85511	0.00194342	ENSG00000173175	ADCY5
71.2574	0.854193	0.00850898	ENSG00000150967	ABCB9
645.5	0.854049	8.67064e-11	ENSG00000285709
308.042	0.851665	2.09813e-05	ENSG00000178878	APOLD1
685.883	0.851338	5.43819e-12	ENSG00000186818	LILRB4
6079.75	0.850645	0.000732018	ENSG00000204392	LSM2
92.0357	0.84791	0.0012719	ENSG00000234160	AL513165,1
83.7933	0.847283	0.0113224	ENSG00000119900	OGFRL1
534.548	0.846497	3.51333e-09	ENSG00000198753	PLXNB3
178.279	0.846489	8.48062e-05	ENSG00000180483	DEFB119
389.119	0.846424	1.70308e-07	ENSG00000184056	VPS33B
192.831	0.846194	4.69787e-05	ENSG00000251647	AC114781,4
66.8293	0.845055	0.0165479	ENSG00000153406	NMRAL1
268.112	0.844248	1.03465e-05	ENSG00000173418	NAA20
47.6931	0.843426	0.0190654	ENSG00000119729	RHOQ
49.2146	0.843077	0.026971	ENSG00000106952	TNFSF8
184.704	0.842557	0.000280797	ENSG00000065029	ZNF76
376.41	0.840798	6.33656e-07	ENSG00000184068	AL021453,1
497.207	0.839571	1.43182e-07	ENSG00000119760	SUPT7L
1941.14	0.83916	7.8171e-10	ENSG00000197487	GALP
974.613	0.839002	5.68097e-19	ENSG00000126561	STAT5A
79.629	0.838237	0.00392152	ENSG00000261304	LINC02252
1281.98	0.838224	2.04967e-10	ENSG00000102359	SRPX2
56.8351	0.837821	0.0444994	ENSG00000291191
440.159	0.835551	1.59581e-08	ENSG00000153814	JAZF1
927.337	0.83454	2.09679e-13	ENSG00000189334	S100A14
562.469	0.834468	7.14171e-12	ENSG00000135622	SEMA4F
41.4709	0.834277	0.0494466	ENSG00000276311	MIR6511A3
1299.95	0.833787	1.40524e-11	ENSG00000255329	H2AFZP4
184.722	0.833366	0.00700491	ENSG00000169519	METTL15
49.4061	0.833189	0.0346257	ENSG00000188649	CC2D2B
126.279	0.83291	0.00514353	ENSG00000250882	AC010261,1
3052.6	0.832144	6.80115e-09	ENSG00000130254	SAFB2
175.171	0.830122	0.0020725	ENSG00000205221	VIT
125.384	0.829973	0.00071271	ENSG00000258792	AL137230,1
56.5829	0.826076	0.0137969	ENSG00000151229	SLC2A13
2089.7	0.825488	9.39706e-10	ENSG00000293514
599.802	0.824512	1.26661e-06	ENSG00000268006	PTOV1-AS1
4167.9	0.823218	1.78288e-14	ENSG00000125651	GTF2F1
222.991	0.821595	1.40926e-06	ENSG00000138435	CHRNA1
212.997	0.821508	5.92726e-05	ENSG00000162894	FCMR
722.639	0.821354	1.00157e-10	ENSG00000169231	THBS3
1029.3	0.821334	1.47686e-13	ENSG00000273841	TAF9
555.981	0.820881	6.00545e-10	ENSG00000073803	MAP3K13
29.4937	0.820249	0.0418773	ENSG00000262777	AC032044,1
162.606	0.819932	0.00296421	ENSG00000174407	MIR1-1HG
213.948	0.819901	3.23131e-05	ENSG00000146197	SCUBE3
47.5538	0.819753	0.0342748	ENSG00000293495
284.115	0.819351	3.21932e-06	ENSG00000003756	RBM5
83.7814	0.81881	0.00267603	ENSG00000235663	SAPCD1-AS1
165.666	0.818414	0.000557186	ENSG00000133193	FAM104A
505.333	0.818353	1.27775e-07	ENSG00000089335	ZNF302
77.7108	0.817885	0.0080078	ENSG00000242252	BGLAP
182.487	0.817617	6.27723e-06	ENSG00000266710	RN7SL48P
65.559	0.817295	0.0149105	ENSG00000049618	ARID1B
282.032	0.81718	0.000404079	ENSG00000149798	CDC42EP2
98.9903	0.816345	0.00043848	ENSG00000141543	EIF4A3
118.802	0.816053	0.00252352	ENSG00000168434	COG7
186.446	0.815495	0.000514041	ENSG00000198496	NBR2
75.5814	0.815072	0.00132098	ENSG00000144040	SFXN5
64.5674	0.814637	0.0334594	ENSG00000198816	ZNF358
201.354	0.813433	0.00530456	ENSG00000111653	ING4
483.666	0.812952	1.24879e-09	ENSG00000267002	AC060780,1
514.552	0.812373	2.49851e-09	ENSG00000254510	AP001107,5
371.576	0.811155	1.20652e-05	ENSG00000280381	AC026362,2
133.343	0.81013	0.000214992	ENSG00000260930	LINC01416
522.474	0.809638	2.66253e-08	ENSG00000115155	OTOF
169.202	0.809034	0.00305785	ENSG00000176029	C11orf16
88.9252	0.809032	0.00349557	ENSG00000151422	FER
86.3906	0.808892	0.00568667	ENSG00000116337	AMPD2
107.374	0.808572	0.00626817	ENSG00000140259	MFAP1
196.539	0.807716	9.65068e-05	ENSG00000231507	LINC01353
77.8181	0.807381	0.0158135	ENSG00000108759	KRT32
4221.08	0.806854	1.19588e-22	ENSG00000170956	CEACAM3
447.178	0.805412	4.7752e-05	ENSG00000212296	SNORD72
395.939	0.804538	2.11457e-09	ENSG00000279674	AC123769,1
57.538	0.804095	0.0372757	ENSG00000230393	AC092667,1
93.7997	0.803849	0.0112249	ENSG00000258520	AL359317,1
109.915	0.803284	0.000182749	ENSG00000146918	NCAPG2
48.489	0.803269	0.0293228	ENSG00000215421	ZNF407
82.3005	0.802594	0.00598098	ENSG00000102977	ACD
69.0309	0.801697	0.00665222	ENSG00000224791	KRT18P39
190.073	0.800054	0.00102782	ENSG00000235098	ANKRD65
611.931	0.799918	8.5029e-07	ENSG00000051523	CYBA
137.672	0.79669	0.000190312	ENSG00000211788	TRAV13-1
131.214	0.796416	0.0106807	ENSG00000007952	NOX1
1338.12	0.795669	6.16679e-09	ENSG00000224055	GAPDHP55
538.916	0.795448	9.34328e-07	ENSG00000171403	KRT9
82.5636	0.795177	0.0189961	ENSG00000277958	RF00017
111.725	0.794864	0.00097482	ENSG00000275152	CCL16
99.7943	0.794585	0.012649	ENSG00000259803	SLC22A31
697.409	0.794413	1.70179e-07	ENSG00000273618	AL135999,2
68.6703	0.793953	0.0106903	ENSG00000260630	SNAI3-AS1
59.446	0.793158	0.01298	ENSG00000124092	CTCFL
447.614	0.793	0.000178609	ENSG00000260220	CCDC187
37.0528	0.791944	0.0452462	ENSG00000249258	AC079193,2
82.5	0.791887	0.0106824	ENSG00000169057	MECP2
261.48	0.790825	5.769e-05	ENSG00000247498	GPRC5D-AS1
114.732	0.790662	0.00397201	ENSG00000267855	NDUFA7
77.7522	0.790659	0.0125578	ENSG00000289857
5050.29	0.790226	1.28399e-21	ENSG00000213866	YBX1P10
281.982	0.790073	2.29705e-06	ENSG00000180209	MYLPF
99.8528	0.78587	0.0251657	ENSG00000204542	C6orf15
435.044	0.785557	0.000123676	ENSG00000145087	STXBP5L
96.5132	0.785234	0.00515455	ENSG00000234592	AL359845,1
750.157	0.783271	4.41371e-07	ENSG00000166862	CACNG2
227.946	0.782784	3.46412e-05	ENSG00000268903	AL627309,6
705.721	0.782033	5.70202e-06	ENSG00000037749	MFAP3
51.8059	0.779734	0.025333	ENSG00000232234	AL355499,1
1175.79	0.778774	3.75629e-14	ENSG00000114656	KIAA1257
247.018	0.778492	1.41277e-05	ENSG00000289468
78.786	0.778291	0.00325918	ENSG00000240216	CPHL1P
1006.36	0.777679	0.00637233	ENSG00000188784	PLA2G2E
79.5395	0.777437	0.00350782	ENSG00000170801	HTRA3
196.106	0.777281	0.00370977	ENSG00000067955	CBFB
312.499	0.776761	0.00247862	ENSG00000162551	ALPL
224.746	0.774272	0.000503047	ENSG00000234297	AL592293,2
100.15	0.77416	0.014127	ENSG00000221968	FADS3
428.855	0.774073	0.000420135	ENSG00000196517	SLC6A9
123.655	0.77338	0.0102547	ENSG00000236162	AC092687,2
84.1225	0.773206	0.00982004	ENSG00000256139	AC007637,1
488.468	0.77231	3.90965e-12	ENSG00000219682	AL133268,1
571.02	0.771666	1.17641e-06	ENSG00000133114	GPALPP1
712.492	0.770714	4.9174e-08	ENSG00000076067	RBMS2
195.636	0.769025	0.00123255	ENSG00000261427	AC099518,3
148.858	0.769	0.000386742	ENSG00000100024	UPB1
173.398	0.76745	0.000945795	ENSG00000072786	STK10
53.5616	0.766143	0.0141316	ENSG00000072201	LNX1
155.134	0.765936	0.00124796	ENSG00000183741	CBX6
84.9062	0.765787	0.019011	ENSG00000170832	USP32
64.0356	0.765673	0.0423349	ENSG00000104154	SLC30A4
1782.78	0.765304	6.16284e-06	ENSG00000117523	PRRC2C
476.907	0.764757	8.25072e-05	ENSG00000267121	AC008105,3
165.373	0.764445	0.000323099	ENSG00000139437	TCHP
241.035	0.763663	0.00203693	ENSG00000267767	LINC01801
235.711	0.763582	6.40417e-06	ENSG00000261879	AC087500,1
255.191	0.763552	0.00113799	ENSG00000242137	RPL11P5
107.24	0.762724	0.00599916	ENSG00000260944	FOXC2-AS1
432.348	0.762107	8.26412e-09	ENSG00000154760	SLFN13
230.029	0.76193	0.000338596	ENSG00000131435	PDLIM4
172.642	0.761399	4.46233e-05	ENSG00000072864	NDE1
77.7107	0.76048	0.0277022	ENSG00000257477	LINC01154
259.515	0.759845	0.00480946	ENSG00000050820	BCAR1
147.074	0.758953	0.00371261	ENSG00000288888
305.37	0.758901	0.000352017	ENSG00000203325	AL445248,1
154.468	0.757405	0.0071777	ENSG00000230375	GSTA11P
1008.11	0.756701	1.54795e-08	ENSG00000149657	LSM14B
54.2613	0.756027	0.0243114	ENSG00000171863	RPS7
715.995	0.754895	1.65686e-12	ENSG00000108344	PSMD3
252.411	0.75286	0.00431389	ENSG00000227154	AL022721,1
260.615	0.752214	0.000201257	ENSG00000284707	AC079781,5
93.4477	0.751857	0.00373476	ENSG00000128872	TMOD2
346.555	0.750522	0.000399315	ENSG00000104983	CCDC61
54.7928	0.750514	0.0172918	ENSG00000127903	ZNF835
104.966	0.750207	0.00876819	ENSG00000167483	FAM129C
72.202	0.749909	0.00522657	ENSG00000162148	PPP1R32
56.719	0.749553	0.0437051	ENSG00000154930	ACSS1
297.85	0.74945	1.81253e-05	ENSG00000202472	RNA5SP248
153.716	0.749024	0.00386548	ENSG00000160691	SHC1
103.403	0.745501	0.0265166	ENSG00000100603	SNW1
97.3663	0.74548	0.0267564	ENSG00000260121	AC138028,4
60.2006	0.744438	0.0157144	ENSG00000279047	AC244517,5
111.077	0.744115	0.0258581	ENSG00000287041
246.831	0.742909	0.000399433	ENSG00000115423	DNAH6
129.851	0.742051	0.00455345	ENSG00000170848	PSG6
153.018	0.741537	0.00616162	ENSG00000134258	VTCN1
188.176	0.741314	0.000891209	ENSG00000033170	FUT8
128.957	0.740792	0.0092057	ENSG00000166394	CYB5R2
325.574	0.739571	0.000730477	ENSG00000133315	MACROD1
502.483	0.738118	4.44413e-08	ENSG00000244139	RN7SL397P
27561.5	0.737695	8.50828e-12	ENSG00000105053	VRK3
3463.38	0.737185	2.57043e-07	ENSG00000160789	LMNA
297.21	0.736488	0.00106474	ENSG00000254818	AP004607,3
52.4556	0.735737	0.0276208	ENSG00000140416	TPM1
73.3533	0.735713	0.0231257	ENSG00000196968	FUT11
192.495	0.734876	0.00111498	ENSG00000279203	AC005785,2
81.1372	0.734833	0.0202184	ENSG00000198668	CALM1
336.596	0.734291	2.1239e-05	ENSG00000197702	PARVA
216.716	0.734277	0.000644325	ENSG00000075292	ZNF638
709.428	0.733788	1.74734e-09	ENSG00000184792	OSBP2
480.4	0.732937	4.46669e-08	ENSG00000177731	FLII
108.064	0.731858	0.00787206	ENSG00000290678
111.779	0.730133	0.00863238	ENSG00000287298
63.0795	0.730044	0.033318	ENSG00000107758	PPP3CB
1451.86	0.729748	1.76943e-05	ENSG00000160883	HK3
69.1049	0.729324	0.0393528	ENSG00000173124	ACSM6
177.088	0.729256	0.000300148	ENSG00000183801	OLFML1
586.305	0.728469	1.59848e-07	ENSG00000109805	NCAPG
155.424	0.728114	0.000407683	ENSG00000100380	ST13
64.3636	0.725215	0.0475054	ENSG00000160336	ZNF761
262.006	0.724407	0.000236381	ENSG00000232771	PPP1R26P5
7490.96	0.723499	1.84189e-11	ENSG00000089280	FUS
140.164	0.723188	0.00580674	ENSG00000135823	STX6
431.366	0.723143	3.84956e-08	ENSG00000260528	FAM157C
66.5511	0.723103	0.043817	ENSG00000152465	NMT2
115.152	0.722753	0.00164375	ENSG00000238210	ETDA
542.973	0.721895	7.24433e-07	ENSG00000227496	AC099066,2
75.5386	0.721493	0.0221595	ENSG00000188624	IGFL3
633.153	0.719327	3.02784e-07	ENSG00000076513	ANKRD13A
270.358	0.718989	0.000241969	ENSG00000205045	SLFN12L
120.547	0.718783	0.0021833	ENSG00000140474	ULK3
224.672	0.717574	0.000214174	ENSG00000114796	KLHL24
125.954	0.717008	0.0125229	ENSG00000256851	AL663061,1
1821.49	0.716709	1.83658e-06	ENSG00000130332	LSM7
256.965	0.716503	0.000644548	ENSG00000136270	TBRG4
1110.91	0.716162	4.69021e-07	ENSG00000152520	PAN3
270.565	0.715717	6.49399e-06	ENSG00000275488	AC023509,5
70.6103	0.715587	0.0279167	ENSG00000133794	ARNTL
157.234	0.714427	0.00849354	ENSG00000269404	SPIB
887.809	0.712723	6.29937e-07	ENSG00000188735	TMEM120B
580.931	0.712174	8.83735e-10	ENSG00000243366	RN7SL60P
88.7764	0.712048	0.0407437	ENSG00000218510	LINC00339
436.535	0.711608	3.85221e-06	ENSG00000280347	AC000123,3
178.873	0.711085	0.00460527	ENSG00000087448	KLHL42
66.9391	0.710682	0.0186815	ENSG00000293276
4672.8	0.709585	1.31179e-12	ENSG00000198431	TXNRD1
599.746	0.709313	0.000136505	ENSG00000182912	TSPEAR-AS2
663.951	0.70931	6.48704e-05	ENSG00000140044	JDP2
224.542	0.708267	0.000913645	ENSG00000279428	AC087164,2
779.02	0.707876	1.49317e-06	ENSG00000177674	AGTRAP
100.344	0.706879	0.021517	ENSG00000183207	RUVBL2
72.7691	0.706596	0.00638123	ENSG00000196155	PLEKHG4
250.934	0.705676	0.000136588	ENSG00000158411	MITD1
120.708	0.705671	0.0358017	ENSG00000145220	LYAR
587.067	0.70558	1.29101e-07	ENSG00000260542	AL499627,1
321.016	0.705562	3.31246e-05	ENSG00000165434	PGM2L1
202.99	0.705087	0.00456314	ENSG00000102109	PCSK1N
111.107	0.704795	0.00843716	ENSG00000288922
86.454	0.703867	0.033693	ENSG00000100083	GGA1
1340.1	0.70324	5.82517e-06	ENSG00000215529	EFCAB8
139.96	0.702501	0.00558723	ENSG00000290871
683.736	0.702143	9.62513e-10	ENSG00000137501	SYTL2
104.622	0.702017	0.0132932	ENSG00000160712	IL6R
209.965	0.700982	0.00226851	ENSG00000167004	PDIA3
531.907	0.700907	7.06997e-06	ENSG00000120910	PPP3CC
58.9285	0.699396	0.0339424	ENSG00000267669	AC098847,1
67.5035	0.698874	0.037952	ENSG00000108669	CYTH1
172.454	0.698766	0.00747232	ENSG00000231961	AL035461,1
175.735	0.698071	0.000372262	ENSG00000186908	ZDHHC17
1146.68	0.6979	5.89882e-05	ENSG00000143199	ADCY10
127.095	0.697803	0.013698	ENSG00000100504	PYGL
114.502	0.697309	0.00741711	ENSG00000189233	NUGGC
330.948	0.697084	0.000623272	ENSG00000134815	DHX34
189.518	0.696774	0.00244708	ENSG00000207605	MIR191
74.599	0.695901	0.0144733	ENSG00000238832	RF01233
148.035	0.69537	0.00283026	ENSG00000251127	AC091173,1
342.15	0.695295	6.92112e-05	ENSG00000102858	MGRN1
403.042	0.69482	6.62208e-05	ENSG00000128833	MYO5C
76.8238	0.693607	0.00921049	ENSG00000287302
418.824	0.693498	0.000603053	ENSG00000137709	POU2F3
274.835	0.693428	6.33584e-05	ENSG00000142959	BEST4
127.826	0.692816	0.00230793	ENSG00000169908	TM4SF1
412.477	0.691628	8.38976e-08	ENSG00000231074	HCG18
461.566	0.691463	1.60409e-05	ENSG00000185885	IFITM1
219.938	0.690843	0.00115691	ENSG00000187609	EXD3
118.332	0.690119	0.0281194	ENSG00000122965	RBM19
79.674	0.690062	0.0141723	ENSG00000213296	AC005521,1
82.4955	0.689578	0.0381118	ENSG00000100271	TTLL1
112.181	0.689092	0.0147824	ENSG00000215256	DHRS4-AS1
777.945	0.688912	2.16033e-07	ENSG00000291165
860.166	0.688247	2.17308e-05	ENSG00000278182	AC239860,2
144.265	0.687978	0.00503772	ENSG00000287479
406.597	0.687697	0.000192487	ENSG00000271843	AC012557,1
87.4682	0.687502	0.00824491	ENSG00000187239	FNBP1
168.756	0.68676	6.32552e-05	ENSG00000243943	ZNF512
111.037	0.686707	0.0332602	ENSG00000157741	UBN2
1315.32	0.684868	3.86629e-09	ENSG00000161609	CCDC155
419.574	0.684537	8.39481e-06	ENSG00000102057	KCND1
147.675	0.684271	0.00404015	ENSG00000243224	AC006252,1
527.502	0.683721	1.8464e-07	ENSG00000234371	RPSAP31
550.564	0.683534	0.000101119	ENSG00000279548	AL022323,5
660.521	0.682819	9.40942e-06	ENSG00000138303	ASCC1
169.212	0.681128	0.00534101	ENSG00000135205	CCDC146
277.648	0.680447	0.00625538	ENSG00000146858	ZC3HAV1L
182.17	0.680396	0.0130714	ENSG00000225285	LINC01770
148.8	0.680323	0.0014788	ENSG00000167851	CD300A
153.617	0.680058	0.0125178	ENSG00000172940	SLC22A13
607.093	0.679652	8.94808e-06	ENSG00000100422	CERK
561.947	0.679484	0.00105588	ENSG00000198870	STKLD1
138.949	0.678887	0.000792399	ENSG00000260019	LINC01992
2441.9	0.678279	7.9873e-09	ENSG00000102870	ZNF629
457.629	0.67807	2.85483e-05	ENSG00000035403	VCL
310.336	0.677509	1.55964e-06	ENSG00000165899	OTOGL
3600.58	0.677262	3.2739e-06	ENSG00000246596	AC139795,1
1297.71	0.676899	9.14688e-07	ENSG00000186019	AC021092,1
301.299	0.676765	0.000129585	ENSG00000215014	AL645728,1
2058.16	0.675318	9.80254e-14	ENSG00000293433
156.702	0.67519	0.000426708	ENSG00000011376	LARS2
2689	0.674759	6.39584e-10	ENSG00000163956	LRPAP1
270.507	0.674286	0.00129991	ENSG00000178233	TMEM151B
166.718	0.67405	0.00290065	ENSG00000160753	RUSC1
390.597	0.673021	0.00122238	ENSG00000248873	SERBP1P6
117.086	0.67281	0.0161337	ENSG00000166682	TMPRSS5
84.0592	0.671158	0.016547	ENSG00000054690	PLEKHH1
445.549	0.670859	9.24358e-05	ENSG00000143028	SYPL2
195.279	0.670795	0.000759739	ENSG00000136631	VPS45
324.695	0.669549	0.00366277	ENSG00000291212
226.759	0.668589	0.00407878	ENSG00000178188	SH2B1
3097.71	0.668289	1.14279e-08	ENSG00000149488	TMC2
2135.25	0.667677	6.22727e-09	ENSG00000180815	MAP3K15
283.773	0.667501	0.000109999	ENSG00000158517	NCF1
55.402	0.667387	0.0330401	ENSG00000170498	KISS1
231.52	0.666675	0.000358796	ENSG00000177733	HNRNPA0
108.436	0.666419	0.00523121	ENSG00000169925	BRD3
154.489	0.666418	0.0080518	ENSG00000269600	AC016629,2
439.236	0.666292	4.42289e-07	ENSG00000279806	AC018629,1
291.186	0.666195	0.000653791	ENSG00000230189	AC008267,2
78.8642	0.666128	0.0439041	ENSG00000103502	CDIPT
182.82	0.665758	0.0270422	ENSG00000230615	AL139220,2
216.974	0.665659	0.000133174	ENSG00000120509	PDZD11
1757.68	0.665587	1.66315e-09	ENSG00000171456	ASXL1
758.576	0.664241	7.06536e-05	ENSG00000198721	ECI2
769.209	0.663383	3.39832e-06	ENSG00000213066	FGFR1OP
155.542	0.663205	0.000363294	ENSG00000117020	AKT3
486.186	0.663031	2.6805e-08	ENSG00000158856	DMTN
170.947	0.662677	0.0113634	ENSG00000287934
279.563	0.661746	0.0024216	ENSG00000148357	HMCN2
202.319	0.661689	0.0119195	ENSG00000135409	AMHR2
1146.61	0.661223	2.26997e-06	ENSG00000186714	CCDC73
1009.86	0.661064	5.77213e-12	ENSG00000116151	MORN1
100.476	0.660981	0.0348113	ENSG00000239911	PRKAG2-AS1
113.888	0.660786	0.00824809	ENSG00000237452	BHMG1
600.818	0.660025	0.000182816	ENSG00000134574	DDB2
1115.04	0.65906	3.63092e-09	ENSG00000236383	LINC00854
100.235	0.657402	0.0368273	ENSG00000272269	AL138724,1
74.6706	0.656951	0.0212825	ENSG00000215283	HMGB3P24
201.148	0.656263	0.000177116	ENSG00000138430	OLA1
151.321	0.656243	0.00050379	ENSG00000204482	LST1
148.845	0.655487	0.00320222	ENSG00000184619	KRBA2
534.723	0.655235	0.000193919	ENSG00000138771	SHROOM3
233.033	0.65491	0.0134093	ENSG00000249198	AC106822,1
229.996	0.65433	0.00179177	ENSG00000149187	CELF1
357.074	0.654055	0.000327453	ENSG00000135362	PRR5L
94.4863	0.65273	0.0334248	ENSG00000158113	LRRC43
400.729	0.652384	0.000516656	ENSG00000215193	PEX26
567.496	0.652253	0.000408323	ENSG00000164398	ACSL6
226.766	0.651806	0.00028794	ENSG00000159842	ABR
374.333	0.650937	0.000563416	ENSG00000157890	MEGF11
419.896	0.650642	0.00308856	ENSG00000128944	KNSTRN
200.741	0.649999	0.0127909	ENSG00000248222	AC011389,1
359.184	0.648114	2.89149e-05	ENSG00000124702	KLHDC3
624.053	0.647335	7.84669e-05	ENSG00000280106	AC008555,8
4051.42	0.646938	1.07097e-08	ENSG00000162174	ASRGL1
505.463	0.645572	8.5511e-06	ENSG00000278829	AC099811,5
150.917	0.645481	0.00621168	ENSG00000100056	ESS2
140.994	0.644241	0.0102589	ENSG00000278665	AC020765,3
166.915	0.64383	0.00124604	ENSG00000225886	AL445490,1
256.947	0.64345	0.000307087	ENSG00000225676	AC002378,1
99.2672	0.643317	0.00982488	ENSG00000100883	SRP54
283.184	0.643262	0.00176396	ENSG00000184557	SOCS3
184.791	0.642643	0.00710071	ENSG00000177693	OR4F4
140.654	0.642312	0.0332618	ENSG00000152133	GPATCH11
721.174	0.640608	1.35337e-08	ENSG00000214021	TTLL3
113.116	0.640406	0.00334127	ENSG00000085872	CHERP
71.3079	0.638374	0.0385434	ENSG00000256596	AC026358,1
70.0657	0.637856	0.0211661	ENSG00000121742	GJB6
572.153	0.637823	0.000423421	ENSG00000269086	AC008555,2
66.4276	0.637363	0.047303	ENSG00000046647	GEMIN8
374.842	0.637019	9.80057e-06	ENSG00000289973
200.416	0.635604	0.00316899	ENSG00000204815	TTC25
504.855	0.635372	7.3186e-05	ENSG00000083457	ITGAE
298.174	0.63528	4.87678e-05	ENSG00000166183	ASPG
413.285	0.633828	4.88519e-06	ENSG00000124440	HIF3A
119.006	0.63368	0.00378475	ENSG00000100401	RANGAP1
391.131	0.633596	0.00067845	ENSG00000116990	MYCL
1835.71	0.633295	1.0234e-05	ENSG00000130560	UBAC1
743.566	0.632885	3.76107e-09	ENSG00000130311	DDA1
256.863	0.632607	4.77265e-05	ENSG00000151892	GFRA1
178.007	0.631392	0.00852128	ENSG00000137841	PLCB2
71.5288	0.631339	0.0333182	ENSG00000262962	KARSP3
628.071	0.63076	4.58414e-05	ENSG00000173894	CBX2
348.588	0.630569	0.00284129	ENSG00000228709	LINC02575
3980.45	0.63052	6.96531e-07	ENSG00000160679	CHTOP
724.457	0.6301	1.67876e-06	ENSG00000176390	CRLF3
1789.54	0.62949	2.98162e-08	ENSG00000291080
1303.96	0.629296	2.95608e-12	ENSG00000169592	INO80E
324.465	0.628866	0.000184556	ENSG00000254533	AF186192,1
2526.39	0.628711	1.22862e-09	ENSG00000126883	NUP214
1081.31	0.628548	3.95978e-09	ENSG00000166924	NYAP1
477.883	0.627963	1.29741e-06	ENSG00000151062	CACNA2D4
635.112	0.626644	2.81902e-05	ENSG00000184445	KNTC1
880.545	0.626173	1.25481e-05	ENSG00000204257	HLA-DMA
185.029	0.625816	0.0133164	ENSG00000290890
108.483	0.625442	0.0127628	ENSG00000102804	TSC22D1
444.566	0.624156	1.42431e-06	ENSG00000262246	CORO7
478.851	0.623785	1.37577e-07	ENSG00000205913	SRRM2-AS1
137.125	0.623551	0.0154642	ENSG00000200591	RF00019
145.33	0.622608	0.0105322	ENSG00000135473	PAN2
138.77	0.621569	0.0123128	ENSG00000269427	AC024075,3
118.139	0.621436	0.0359125	ENSG00000164080	RAD54L2
74.9984	0.621223	0.0401756	ENSG00000182621	PLCB1
233.558	0.620998	0.000410895	ENSG00000072071	ADGRL1
1835.13	0.618766	2.54687e-17	ENSG00000075151	EIF4G3
270.675	0.618362	0.000935096	ENSG00000105321	CCDC9
480.631	0.618233	0.00135191	ENSG00000148248	SURF4
615.477	0.618003	7.18412e-06	ENSG00000184831	APOO
1774.19	0.617985	5.93347e-12	ENSG00000130741	EIF2S3
174.968	0.616833	0.0168755	ENSG00000074410	CA12
756.983	0.61678	0.00026558	ENSG00000197037	ZSCAN25
1250.94	0.616593	6.23316e-09	ENSG00000099991	CABIN1
133.66	0.615793	0.0107723	ENSG00000291097
416.657	0.61464	3.95177e-06	ENSG00000234771	SLC25A25-AS1
125.034	0.613617	0.0498588	ENSG00000132600	PRMT7
120.095	0.613608	0.0272559	ENSG00000184206	GOLGA6L4
432.479	0.613263	0.000761754	ENSG00000251593	MSNP1
809.798	0.612568	1.02902e-06	ENSG00000124508	BTN2A2
684.313	0.611252	2.61239e-07	ENSG00000171490	RSL1D1
168.68	0.611076	0.00421441	ENSG00000272620	AFAP1-AS1
199.067	0.610934	0.00336422	ENSG00000146857	STRA8
86.2279	0.610928	0.0414454	ENSG00000260260	SNHG19
2006.62	0.610819	7.42949e-05	ENSG00000099899	TRMT2A
92.9036	0.610673	0.0340116	ENSG00000260377	AC083801,2
133.193	0.610558	0.0149427	ENSG00000229453	SPINK8
150.345	0.610387	0.00533218	ENSG00000107951	MTPAP
2789.28	0.610347	6.08886e-14	ENSG00000183914	DNAH2
192.269	0.61019	0.000459708	ENSG00000278899	AL358852,1
92.7524	0.610172	0.0240511	ENSG00000224077	AP000936,1
665.327	0.610085	4.53632e-05	ENSG00000165953	SERPINA12
654.834	0.609539	0.000145579	ENSG00000126882	FAM78A
72.7302	0.6094	0.034122	ENSG00000204653	ASPDH
674.713	0.608934	4.69508e-08	ENSG00000228624	HDAC2-AS2
133.236	0.608143	0.018385	ENSG00000146085	MUT
401.793	0.607946	0.000466181	ENSG00000279875	AC074029,4
2166.97	0.607752	2.36794e-07	ENSG00000197616	MYH6
213.291	0.607652	0.00803585	ENSG00000126267	COX6B1
199.48	0.607537	0.0123576	ENSG00000109846	CRYAB
2213.64	0.607286	2.49479e-09	ENSG00000167914	GSDMA
125.517	0.606919	0.0254739	ENSG00000173421	CCDC36
218.721	0.606395	0.00120286	ENSG00000273634	AC079395,2
87.3029	0.606212	0.0241805	ENSG00000023516	AKAP11
71.309	0.605595	0.0449799	ENSG00000248587	GDNF-AS1
1242.35	0.605229	2.5663e-08	ENSG00000198517	MAFK
159.734	0.605032	0.00538343	ENSG00000011295	TTC19
315.763	0.604616	0.00119719	ENSG00000198198	SZT2
10224.2	0.604409	3.29669e-07	ENSG00000262179	MYMX
109.541	0.603971	0.0173858	ENSG00000234426	AL139042,1
180.036	0.603757	0.0235019	ENSG00000214097	SMCO1
162.76	0.602541	0.01507	ENSG00000258390	LINC02318
806.253	0.602347	9.5819e-06	ENSG00000284196	AL158064,1
207.173	0.601879	0.00151127	ENSG00000177000	MTHFR
133.338	0.601259	0.0083489	ENSG00000204410	MSH5
184.566	0.600787	0.00225244	ENSG00000111328	CDK2AP1
96.3429	0.600307	0.0324794	ENSG00000268790	AC008764,4
1695.08	0.600183	4.70398e-09	ENSG00000163793	DNAJC5G
103.244	0.59946	0.0240625	ENSG00000135506	OS9
158.322	0.5991	0.011965	ENSG00000257057	C11orf97
482.551	0.598421	0.00010827	ENSG00000293569
207.353	0.597432	0.00305534	ENSG00000188051	TMEM221
606.836	0.597269	0.000261202	ENSG00000222429	RNU6-955P
366.582	0.596598	0.00383758	ENSG00000044090	CUL7
1456.16	0.596593	7.65003e-09	ENSG00000164068	RNF123
291.347	0.59594	0.00307682	ENSG00000076641	PAG1
393.017	0.595791	0.0117422	ENSG00000102145	GATA1
241.691	0.595657	9.76343e-05	ENSG00000116191	RALGPS2
119.572	0.595651	0.0152193	ENSG00000293465
115.929	0.59514	0.0298467	ENSG00000004399	PLXND1
120.189	0.594596	0.0376678	ENSG00000267526	AC005702,2
1381.83	0.59459	1.23651e-07	ENSG00000100319	ZMAT5
342.16	0.594292	0.00648515	ENSG00000104879	CKM
358.691	0.593672	0.00016259	ENSG00000275066	SYNRG
210.651	0.592208	0.0102565	ENSG00000120256	LRP11
765.508	0.592007	3.91306e-05	ENSG00000197601	FAR1
98.6603	0.590514	0.0238906	ENSG00000269794	AC010642,1
805.951	0.590461	2.11678e-05	ENSG00000243316	GUCY2GP
902.178	0.590256	1.62867e-06	ENSG00000116688	MFN2
257.676	0.59009	0.000741459	ENSG00000103353	UBFD1
273.444	0.589999	0.00191317	ENSG00000076770	MBNL3
197.254	0.58877	0.011874	ENSG00000239920	AC104389,4
2770.33	0.588383	1.30144e-07	ENSG00000135372	NAT10
378.924	0.588376	0.0055985	ENSG00000232535	OR5H8
439.41	0.587666	3.81218e-05	ENSG00000047579	DTNBP1
803.149	0.587198	0.00200421	ENSG00000069188	SDK2
156.93	0.58707	0.00234143	ENSG00000267481	AC011477,2
151.567	0.586206	0.0257531	ENSG00000158023	WDR66
525.301	0.586077	0.00020219	ENSG00000163611	SPICE1
352.143	0.585224	0.00304916	ENSG00000259099	AC025574,1
5463.33	0.584749	5.528e-11	ENSG00000108506	INTS2
648.726	0.584446	0.000107766	ENSG00000159210	SNF8
150.09	0.583902	0.00373756	ENSG00000173480	ZNF417
98.2357	0.583529	0.041611	ENSG00000111087	GLI1
333.576	0.58309	0.00366007	ENSG00000129158	SERGEF
1623.71	0.582753	8.38885e-07	ENSG00000172613	RAD9A
212.146	0.582573	0.0154334	ENSG00000162441	LZIC
232.698	0.582499	0.00687201	ENSG00000268686	AC010643,1
132.075	0.582469	0.031335	ENSG00000285692
230.643	0.582356	0.00799072	ENSG00000080823	MOK
433.905	0.582008	0.0104512	ENSG00000116729	WLS
385.944	0.581554	0.000164899	ENSG00000280073	AL157996,1
403.659	0.580369	0.00336744	ENSG00000256226	AC092747,1
97.2926	0.579229	0.0264074	ENSG00000107130	NCS1
123.83	0.578903	0.0231414	ENSG00000227091	AL355990,1
12157.5	0.578462	0.000196025	ENSG00000257576	HSPD1P4
480.565	0.578208	5.74985e-05	ENSG00000215039	CD27-AS1
86.7438	0.578166	0.0424969	ENSG00000196724	ZNF418
172.882	0.577915	0.0236493	ENSG00000163975	MELTF
258.281	0.577714	0.00209594	ENSG00000249471	ZNF324B
102.577	0.576862	0.0466247	ENSG00000253376	AC012103,1
1491.64	0.576575	3.35762e-09	ENSG00000118900	UBN1
148.416	0.576087	0.00597821	ENSG00000157322	CLEC18A
12585.3	0.576036	7.19296e-07	ENSG00000231991	ANXA2P2
384.614	0.575836	0.00631332	ENSG00000249502	AC006160,1
483.95	0.575032	0.000587366	ENSG00000204576	PRR3
3943.98	0.574874	8.22578e-09	ENSG00000099250	NRP1
392.477	0.574451	0.00667562	ENSG00000213918	DNASE1
267.811	0.573005	0.00787072	ENSG00000090674	MCOLN1
235.76	0.572899	0.00677457	ENSG00000178803	ADORA2A-AS1
81.5541	0.57246	0.0331021	ENSG00000177144	NUDT4B
122.33	0.570744	0.0270826	ENSG00000280798	LINC00294
2619.98	0.570236	0.0236731	ENSG00000268001	CARD8-AS1
1208.04	0.568895	0.00284846	ENSG00000132688	NES
756.453	0.568197	2.29422e-06	ENSG00000168092	PAFAH1B2
648.588	0.567791	7.81935e-05	ENSG00000152766	ANKRD22
176.479	0.567637	0.00723307	ENSG00000116580	GON4L
873.451	0.56747	5.57354e-05	ENSG00000092847	AGO1
187.876	0.566469	0.0177438	ENSG00000161328	LRRC56
148.458	0.566411	0.00368981	ENSG00000264958	ALOX12P1
4198.26	0.565864	1.86575e-06	ENSG00000197044	ZNF441
385.872	0.565719	0.00266715	ENSG00000122545	07-sep
114.305	0.56533	0.0154263	ENSG00000256625	AC092747,2
358.99	0.565166	5.76754e-05	ENSG00000104921	FCER2
14483.9	0.565105	4.25891e-05	ENSG00000135476	ESPL1
307.399	0.563095	0.00113937	ENSG00000081800	SLC13A1
1066.21	0.562541	0.000524627	ENSG00000177380	PPFIA3
175.088	0.562369	0.000912182	ENSG00000180370	PAK2
109.977	0.561758	0.0273804	ENSG00000196510	ANAPC7
187.431	0.561172	0.00298268	ENSG00000290673
224.412	0.559649	0.0103544	ENSG00000095002	MSH2
3168.57	0.559567	0.000106233	ENSG00000169972	PUSL1
178.201	0.559255	0.00565811	ENSG00000123815	COQ8B
199.927	0.559109	0.0318334	ENSG00000163348	PYGO2
1585.01	0.558991	3.12472e-05	ENSG00000172828	CES3
116.021	0.558894	0.0270515	ENSG00000232615	AC026412,2
171.273	0.558416	0.0113266	ENSG00000085840	ORC1
127.377	0.558416	0.034321	ENSG00000279339	AC100788,2
182.089	0.558341	0.0230683	ENSG00000102984	ZNF821
1082.02	0.556939	0.00011657	ENSG00000130176	CNN1
17626.2	0.556658	8.9539e-07	ENSG00000197136	PCNX3
79.86	0.555563	0.0458356	ENSG00000286455
131.394	0.555029	0.0307789	ENSG00000143493	INTS7
594.713	0.55472	0.00402068	ENSG00000186416	NKRF
159.523	0.554345	0.0110023	ENSG00000143458	GABPB2
219.325	0.554344	0.011807	ENSG00000170689	HOXB9
270.345	0.554331	0.00148507	ENSG00000263482	ANTXRLP1
288.82	0.55428	0.00131086	ENSG00000123352	SPATS2
689.552	0.554127	4.22216e-06	ENSG00000213839	TMX2P1
240.996	0.553986	0.000565867	ENSG00000278318	ZNF229
194.989	0.553634	0.0148603	ENSG00000161849	KRT84
117.546	0.553547	0.0237963	ENSG00000256197	TSPAN9-IT1
440.115	0.552788	0.000141394	ENSG00000260751	AC008870,2
265.82	0.552514	0.00626064	ENSG00000168748	CA7
131.151	0.55189	0.0356077	ENSG00000108557	RAI1
173.231	0.551669	0.00619379	ENSG00000136932	TRMO
649.44	0.550061	4.84373e-05	ENSG00000064545	TMEM161A
219.139	0.549782	0.00154392	ENSG00000089195	TRMT6
238.077	0.549732	0.00148776	ENSG00000104936	DMPK
346.272	0.548752	0.00421832	ENSG00000141971	MVB12A
608.968	0.548747	0.00117514	ENSG00000068079	IFI35
591.581	0.548316	3.03447e-05	ENSG00000146215	CRIP3
502.682	0.547911	0.0104522	ENSG00000140326	CDAN1
208.197	0.547462	0.0293422	ENSG00000137692	DCUN1D5
1023.59	0.547189	4.77642e-07	ENSG00000170776	AKAP13
89.1721	0.547066	0.0436454	ENSG00000140688	C16orf58
1574.54	0.545509	4.26077e-06	ENSG00000038219	BOD1L1
248.051	0.543794	0.0112943	ENSG00000227923	AC006455,3
241.625	0.543348	0.00890203	ENSG00000225335	AC016027,1
521.846	0.543132	1.7853e-05	ENSG00000198646	NCOA6
655.812	0.542789	0.000925006	ENSG00000161860	SYCE2
242.021	0.542597	0.0393767	ENSG00000237803	LINC00211
899.509	0.541053	2.01403e-06	ENSG00000221826	PSG3
216.141	0.540139	0.00357807	ENSG00000240847	RN7SL497P
549.155	0.539914	2.06896e-06	ENSG00000266978	AC011511,2
417.131	0.539475	6.83424e-05	ENSG00000198730	CTR9
367.229	0.539133	0.00404663	ENSG00000054611	TBC1D22A
1000.93	0.538714	3.6626e-08	ENSG00000237793	RPL18AP16
578.071	0.538291	0.00398889	ENSG00000279348	AC012513,3
6399.92	0.538089	4.25864e-06	ENSG00000130749	ZC3H4
492.178	0.537974	4.45573e-05	ENSG00000224443	AC006509,2
127.818	0.53645	0.0148713	ENSG00000124574	ABCC10
297.668	0.536356	0.00109708	ENSG00000170242	USP47
195.699	0.535671	0.00181978	ENSG00000187446	CHP1
1014.52	0.535591	1.23096e-05	ENSG00000133392	MYH11
819.84	0.535121	8.40857e-05	ENSG00000132141	CCT6B
279.459	0.534411	0.0399206	ENSG00000266290	AC015813,3
1854.88	0.534275	5.45948e-08	ENSG00000136383	ALPK3
832.451	0.534062	0.00184384	ENSG00000272068	AL365181,2
534.395	0.53209	0.000910628	ENSG00000136634	IL10
515.78	0.530488	0.000543177	ENSG00000270605	AL353622,1
570.527	0.530396	4.57808e-05	ENSG00000160539	PLPP7
154.252	0.530103	0.043354	ENSG00000249073	WSPAR
247.012	0.529391	0.00493298	ENSG00000263164	AC087500,2
7887.81	0.529083	1.40558e-05	ENSG00000262919	CCNQ
205.882	0.528881	0.0178699	ENSG00000164440	TXLNB
283.106	0.528037	0.00421778	ENSG00000183431	SF3A3
334.824	0.527229	0.0349074	ENSG00000274523	RCC1L
201.372	0.526757	0.0047071	ENSG00000254691	AP002812,3
3233.24	0.52633	2.83629e-09	ENSG00000137486	ARRB1
239.917	0.526258	0.0044492	ENSG00000214548	MEG3
293.583	0.525569	0.00195872	ENSG00000008952	SEC62
4028.21	0.525426	0.0190822	ENSG00000253352	TUG1
220.955	0.525275	0.00325958	ENSG00000198930	CSAG1
310.61	0.524672	0.00297862	ENSG00000235078	AC231981,1
719.621	0.524438	6.06513e-06	ENSG00000093167	LRRFIP2
274.187	0.524429	0.00532757	ENSG00000111254	AKAP3
210.702	0.524403	0.0163411	ENSG00000145390	USP53
1234.86	0.523314	2.95186e-05	ENSG00000103126	AXIN1
316.623	0.522651	0.000327587	ENSG00000131471	AOC3
102.232	0.522102	0.0393937	ENSG00000114738	MAPKAPK3
503.625	0.522012	3.58783e-05	ENSG00000181789	COPG1
352.435	0.521475	0.00076339	ENSG00000162244	RPL29
559.889	0.521272	0.00150824	ENSG00000270110	AL353593,3
1052.36	0.520955	1.06815e-06	ENSG00000160688	FLAD1
1023.16	0.520617	2.43638e-05	ENSG00000090612	ZNF268
129.003	0.5198	0.0426002	ENSG00000274020	LINC01138
170.641	0.518437	0.0419513	ENSG00000175315	CST6
158.474	0.517382	0.0454448	ENSG00000080845	DLGAP4
264.353	0.516906	0.00388701	ENSG00000230368	FAM41C
400.255	0.516851	0.00438978	ENSG00000113269	RNF130
132.091	0.516526	0.0318072	ENSG00000171819	ANGPTL7
3554.59	0.516309	1.78241e-09	ENSG00000167994	RAB3IL1
2204.22	0.516136	3.47182e-06	ENSG00000249673	NOP14-AS1
328.827	0.515813	0.00989572	ENSG00000146005	PSD2
2922.92	0.514744	0.000334293	ENSG00000167703	SLC43A2
1010.32	0.513578	0.000131746	ENSG00000120071	KANSL1
181.719	0.513275	0.0229735	ENSG00000205085	FAM71F2
194.128	0.512252	0.00594496	ENSG00000275131	AC241952,1
275.131	0.511951	0.00484677	ENSG00000268681	COX6CP7
249.385	0.511723	0.00962263	ENSG00000245322	AC097460,1
230.625	0.511319	0.0255924	ENSG00000260293	AC106820,4
506.96	0.510723	0.00278449	ENSG00000177732	SOX12
226.525	0.510075	0.0171876	ENSG00000125409	TEKT3
584.779	0.510032	0.000306426	ENSG00000160111	CPAMD8
268.648	0.509874	0.00323761	ENSG00000273706	LHX1
311.01	0.508913	0.0145517	ENSG00000126461	SCAF1
265.248	0.50879	0.00303284	ENSG00000171174	RBKS
1146.87	0.50835	0.000217493	ENSG00000139209	SLC38A4
2191.89	0.508312	3.67165e-08	ENSG00000239264	TXNDC5
558.477	0.508211	0.00392454	ENSG00000165338	HECTD2
396.308	0.507902	0.00620791	ENSG00000261221	ZNF865
612.115	0.506961	0.00170768	ENSG00000268401	AC007785,3
206.697	0.506369	0.0246329	ENSG00000270858	VDAC1P5
6103.1	0.505811	0.000343218	ENSG00000160633	SAFB
506.525	0.505666	0.000413316	ENSG00000177628	GBA
311.752	0.504994	0.00284274	ENSG00000286472
308.5	0.5044	0.013945	ENSG00000167384	ZNF180
696.64	0.504199	0.000982365	ENSG00000006059	KRT33A
322.302	0.503456	0.00562153	ENSG00000270450	IGKV2OR2-7
219.384	0.503282	0.0474231	ENSG00000066230	SLC9A3
964.883	0.502236	0.000594733	ENSG00000122218	COPA
237.913	0.501391	0.0156835	ENSG00000237738	RNF216-IT1
378.575	0.501302	0.00365317	ENSG00000074370	ATP2A3
2001.83	0.500401	3.64875e-05	ENSG00000264451	AC036222,1
1200.16	0.499963	0.00237569	ENSG00000166959	MS4A8
3206.87	0.49972	1.06568e-06	ENSG00000187994	RINL
762.415	0.498993	0.00143066	ENSG00000058866	DGKG
74.4482	0.498804	0.0459475	ENSG00000275429	MIR6862-1
112.937	0.498642	0.0425409	ENSG00000258772	AL355922,4
175.177	0.497845	0.0210362	ENSG00000265845	AC024267,4
449.958	0.495491	0.00956666	ENSG00000161132	AC007663,1
940.64	0.495004	1.18057e-06	ENSG00000167281	RBFOX3
202.662	0.494281	0.0104588	ENSG00000280334	AC009084,2
410.176	0.494085	0.000123275	ENSG00000125450	NUP85
982.854	0.492279	4.99365e-06	ENSG00000183837	PNMA3
256.866	0.492197	0.011324	ENSG00000215448	SRMP1
523.095	0.491024	0.00106803	ENSG00000126005	MMP24OS
1274.81	0.490676	0.000444003	ENSG00000063761	ADCK1
355.675	0.489154	0.000687009	ENSG00000290705
647.745	0.488374	0.00322378	ENSG00000115204	MPV17
152.408	0.488356	0.0245648	ENSG00000136295	TTYH3
1031.4	0.488293	0.00695528	ENSG00000100151	PICK1
3318.97	0.48813	9.17457e-07	ENSG00000113360	DROSHA
367.641	0.487213	0.0227811	ENSG00000263072	ZNF213-AS1
547.944	0.486814	0.0141236	ENSG00000162129	CLPB
4340.6	0.486782	0.000516581	ENSG00000184209	SNRNP35
240.199	0.486533	0.0100036	ENSG00000162643	WDR63
360.749	0.486492	0.0194288	ENSG00000197446	CYP2F1
3721.6	0.486428	2.64284e-08	ENSG00000171475	WIPF2
126.795	0.484515	0.0436181	ENSG00000186635	ARAP1
594.88	0.484493	0.000335612	ENSG00000172965	MIR4435-2HG
546.431	0.483758	0.00247222	ENSG00000251446	AC113391,2
233.868	0.483114	0.0299963	ENSG00000224895	VPS26BP1
267.878	0.482087	0.0136535	ENSG00000172943	PHF8
178.893	0.481966	0.026688	ENSG00000229539	AL353194,1
1859.04	0.480863	2.83005e-06	ENSG00000205609	EIF3CL
8383.28	0.480856	0.000148945	ENSG00000069431	ABCC9
256.851	0.480035	0.0347977	ENSG00000227729	RD3L
165.2	0.47881	0.0494134	ENSG00000232677	LINC00665
152.532	0.478279	0.0221487	ENSG00000133195	SLC39A11
134.03	0.475572	0.0220774	ENSG00000285857
236.532	0.475545	0.040632	ENSG00000278641	DUX4L15
5359.26	0.475525	0.000159253	ENSG00000135930	EIF4E2
143.764	0.473897	0.0482415	ENSG00000177971	IMP3
701.9	0.473479	0.000606937	ENSG00000124664	SPDEF
208.015	0.473202	0.00689383	ENSG00000116675	DNAJC6
835.318	0.472976	0.000139037	ENSG00000229780	UBE2Q1-AS1
1174.26	0.472743	0.000142977	ENSG00000204560	DHX16
515.591	0.471889	0.000680328	ENSG00000100321	SYNGR1
146.47	0.471868	0.0448873	ENSG00000289207
264.759	0.471585	0.00596412	ENSG00000101310	SEC23B
213.825	0.471125	0.0233787	ENSG00000149577	SIDT2
332.967	0.471046	0.0003939	ENSG00000164587	RPS14
971.536	0.470941	5.85886e-05	ENSG00000103510	KAT8
1075.3	0.470843	6.46536e-05	ENSG00000289855
309.121	0.470838	0.0373157	ENSG00000014257	ACPP
1605.76	0.47076	0.000413601	ENSG00000105254	TBCB
557.572	0.470182	0.0057663	ENSG00000108576	SLC6A4
197.731	0.469392	0.0202127	ENSG00000263787	SKAP1-AS1
741.779	0.469077	0.000166918	ENSG00000286069
980.207	0.469073	0.000191138	ENSG00000168477	TNXB
189.247	0.468975	0.00733597	ENSG00000198520	C1orf228
1751.73	0.468824	1.02527e-09	ENSG00000293510
304.526	0.467723	0.00906158	ENSG00000174705	SH3PXD2B
3195.55	0.467634	1.02243e-07	ENSG00000135387	CAPRIN1
1255.41	0.467382	2.68139e-06	ENSG00000077235	GTF3C1
344.689	0.466984	0.00375839	ENSG00000132676	DAP3
233.56	0.466837	0.0352341	ENSG00000170581	STAT2
1937.65	0.466739	1.09719e-07	ENSG00000285698
396.636	0.466656	0.0065215	ENSG00000289829
325.038	0.466286	0.00494294	ENSG00000131323	TRAF3
271.534	0.464812	0.0182383	ENSG00000226239	AL031658,1
900.256	0.464318	0.000276071	ENSG00000072778	ACADVL
405.906	0.464219	0.00237911	ENSG00000266904	LINC00663
627.335	0.46393	0.0107345	ENSG00000182557	SPNS3
279.972	0.463499	0.00758538	ENSG00000091490	SEL1L3
284.657	0.463306	0.0117553	ENSG00000103064	SLC7A6
395.291	0.463279	0.0104529	ENSG00000289731
176.688	0.461975	0.0316839	ENSG00000146409	SLC18B1
477.425	0.461966	0.0136742	ENSG00000135636	DYSF
609.957	0.461645	0.00937124	ENSG00000144426	NBEAL1
296.676	0.461583	0.00340015	ENSG00000291234
739.367	0.460462	0.000445862	ENSG00000092096	SLC22A17
233.652	0.460031	0.0174579	ENSG00000140481	CCDC33
2426.81	0.458808	0.00696364	ENSG00000175470	PPP2R2D
280.55	0.458719	0.0379427	ENSG00000007255	TRAPPC6A
6778.64	0.457841	0.00111316	ENSG00000167674	HDGFL2
266.006	0.457787	0.00970239	ENSG00000177548	RABEP2
274.745	0.456813	0.00504611	ENSG00000151116	UEVLD
1305.29	0.455521	0.000153268	ENSG00000124467	PSG8
1510.05	0.454909	2.13925e-05	ENSG00000186174	BCL9L
415.616	0.454679	0.0286682	ENSG00000166164	BRD7
172.986	0.45412	0.0320592	ENSG00000235106	BRD3OS
146.524	0.453698	0.0243445	ENSG00000137270	GCM1
622.934	0.452853	0.000578855	ENSG00000103540	CCP110
172.509	0.452823	0.0418756	ENSG00000108423	TUBD1
312.807	0.452574	0.0276657	ENSG00000213160	KLHL23
586.89	0.452322	0.0107527	ENSG00000077585	GPR137B
201.077	0.452254	0.0116436	ENSG00000142534	RPS11
270.382	0.451463	0.0190176	ENSG00000258718	LINC02311
686.223	0.451399	0.00300013	ENSG00000092054	MYH7
568.699	0.450563	0.00137749	ENSG00000215784	FAM72D
1072.12	0.449077	0.012753	ENSG00000249675	AC097487,1
235.516	0.448868	0.0104247	ENSG00000183155	RABIF
229.935	0.448846	0.0120083	ENSG00000280287	AC131212,3
339.542	0.448798	0.0215198	ENSG00000248907	MTND2P33
3552.13	0.448788	0.000191448	ENSG00000112983	BRD8
3279.81	0.447279	0.00110635	ENSG00000204248	COL11A2
2378.26	0.445386	0.00132871	ENSG00000132670	PTPRA
250.423	0.445114	0.0175302	ENSG00000227060	LINC00629
232.568	0.445108	0.0199314	ENSG00000278399	AC026120,1
168.324	0.444904	0.0286447	ENSG00000113739	STC2
1110.7	0.444881	0.00321178	ENSG00000196531	NACA
857.742	0.444823	0.000276916	ENSG00000163462	TRIM46
276.205	0.442815	0.0217702	ENSG00000224621	AL451042,1
966.924	0.441806	0.00677684	ENSG00000272141	AL390719,2
359.865	0.441697	0.00616394	ENSG00000206069	TMEM211
256.757	0.44152	0.0208722	ENSG00000291057
436.576	0.441002	0.00303339	ENSG00000117262	GPR89A
563.69	0.440687	0.00174448	ENSG00000132388	UBE2G1
296.815	0.440569	0.00663318	ENSG00000174628	IQCK
704.563	0.439766	0.000978245	ENSG00000157823	AP3S2
679.165	0.439688	0.000840113	ENSG00000104812	GYS1
176.233	0.439603	0.0384822	ENSG00000234162	AC009505,1
1292.43	0.438787	0.0128174	ENSG00000183760	ACP7
344.685	0.43863	0.00177078	ENSG00000177479	ARIH2
781.484	0.438529	0.000388673	ENSG00000204540	PSORS1C1
541.577	0.437422	0.000798351	ENSG00000249094	AC007834,1
761.885	0.437187	0.000231087	ENSG00000132680	KHDC4
459.914	0.436817	0.017456	ENSG00000261949	GFY
3043.82	0.436712	0.00575819	ENSG00000105607	GCDH
457.048	0.436138	0.00167577	ENSG00000258537	FRMD6-AS2
4028.95	0.435751	0.000112796	ENSG00000188895	MSL1
420.096	0.435426	0.00799046	ENSG00000073060	SCARB1
2056.91	0.435328	8.43867e-05	ENSG00000105323	HNRNPUL1
719.2	0.435106	0.00708366	ENSG00000270610	AL160191,2
727.676	0.435013	0.00857503	ENSG00000110955	ATP5F1B
488.348	0.43451	0.00435845	ENSG00000117697	NSL1
7167.34	0.433559	3.56934e-06	ENSG00000177728	TMEM94
1560.42	0.433292	4.04103e-06	ENSG00000111348	ARHGDIB
719.817	0.432459	0.00180739	ENSG00000286739
373.001	0.43226	0.00876775	ENSG00000130312	MRPL34
404.47	0.430514	0.00176584	ENSG00000287668
244.592	0.43051	0.0130456	ENSG00000259762	AC021739,5
206.097	0.428088	0.030199	ENSG00000283342	AC241584,2
212.158	0.42793	0.0269252	ENSG00000290842
698.977	0.427824	0.00267891	ENSG00000142025	DMRTC2
163.343	0.427064	0.0193431	ENSG00000189298	ZKSCAN3
4235.93	0.42691	0.000786638	ENSG00000145901	TNIP1
266.399	0.426565	0.0148318	ENSG00000158458	NRG2
472.462	0.426189	0.00562811	ENSG00000287549
222.434	0.425165	0.042192	ENSG00000126602	TRAP1
302.504	0.424002	0.0081522	ENSG00000245025	AC107959,1
547.938	0.423751	0.00262765	ENSG00000116871	MAP7D1
257.917	0.423518	0.0495804	ENSG00000198723	TEX45
202.658	0.422079	0.0267021	ENSG00000131238	PPT1
873.534	0.42181	0.00306617	ENSG00000118898	PPL
219.455	0.42105	0.0177801	ENSG00000230495	AL132765,1
802.336	0.420361	8.2265e-05	ENSG00000118557	PMFBP1
422.351	0.420359	0.00953266	ENSG00000100142	POLR2F
225.092	0.418424	0.0183176	ENSG00000163902	RPN1
477.36	0.418071	0.00167928	ENSG00000103160	HSDL1
971.251	0.417974	0.000129504	ENSG00000167077	MEI1
265.369	0.417965	0.0458908	ENSG00000173214	MFSD4B
1059.1	0.417943	0.000188019	ENSG00000139200	PIANP
198.252	0.41751	0.0414901	ENSG00000238447	RNU7-134P
178.954	0.416997	0.0419984	ENSG00000131473	ACLY
178.02	0.416982	0.0308937	ENSG00000185955	C7orf61
848.587	0.416122	0.000222401	ENSG00000166925	TSC22D4
2448.08	0.415206	4.31652e-05	ENSG00000107959	PITRM1
250.403	0.414944	0.0121422	ENSG00000176986	SEC24C
6286.78	0.414849	1.95025e-05	ENSG00000177106	EPS8L2
482.618	0.413218	0.0019734	ENSG00000215186	GOLGA6B
308.642	0.413032	0.0281715	ENSG00000204710	SPDYC
509.2	0.412715	0.00178109	ENSG00000198690	FAN1
2353.87	0.412201	0.000154348	ENSG00000137106	GRHPR
206.211	0.412031	0.0352704	ENSG00000143390	RFX5
409.256	0.411598	0.0018604	ENSG00000146733	PSPH
164.461	0.410218	0.0348044	ENSG00000274422	AC245060,5
387.69	0.409876	0.0168108	ENSG00000123453	SARDH
484.121	0.409796	0.00871964	ENSG00000075413	MARK3
272.194	0.409651	0.00544155	ENSG00000063127	SLC6A16
882.471	0.409647	0.0105294	ENSG00000158850	B4GALT3
403.434	0.409362	0.00399141	ENSG00000160299	PCNT
4022.96	0.408999	0.00510001	ENSG00000157837	SPPL3
594.135	0.408472	0.0304477	ENSG00000236132	AL022331,1
1485.36	0.408335	0.00945611	ENSG00000128011	LRFN1
2174.12	0.40811	0.000542678	ENSG00000204219	TCEA3
333.289	0.408017	0.00280089	ENSG00000166025	AMOTL1
294.464	0.407957	0.0399222	ENSG00000130300	PLVAP
648.158	0.407931	0.0126122	ENSG00000160716	CHRNB2
5591.58	0.407317	0.000327011	ENSG00000070047	PHRF1
327.946	0.407078	0.00713993	ENSG00000226869	LHFPL3-AS1
406.824	0.407017	0.0317106	ENSG00000110435	PDHX
6496.37	0.406939	2.55589e-05	ENSG00000167670	CHAF1A
358.079	0.406765	0.00794081	ENSG00000149346	SLX4IP
319.438	0.406025	0.010104	ENSG00000167196	FBXO22
331.733	0.405702	0.0160293	ENSG00000139044	B4GALNT3
720.03	0.405428	0.00396996	ENSG00000130829	DUSP9
720.04	0.405383	0.00317908	ENSG00000128606	LRRC17
344.86	0.404661	0.0407884	ENSG00000128284	APOL3
558.747	0.404474	0.0110242	ENSG00000180210	F2
295.892	0.404248	0.0245683	ENSG00000141376	BCAS3
164.991	0.403795	0.0374341	ENSG00000128641	MYO1B
188.851	0.403014	0.0294724	ENSG00000250899	AC125807,2
694.967	0.402933	0.00199455	ENSG00000237775	DDR1-AS1
1156.28	0.401481	0.000298849	ENSG00000115525	ST3GAL5
652.639	0.400745	0.00520809	ENSG00000159753	CARMIL2
873.653	0.400481	0.00251585	ENSG00000173818	ENDOV
158.959	0.400416	0.03699	ENSG00000232539	LINC00945
1161.44	0.400106	7.05106e-05	ENSG00000110076	NRXN2
401.14	0.399849	0.0112477	ENSG00000126246	IGFLR1
3024.3	0.399316	9.68283e-08	ENSG00000082397	EPB41L3
385.486	0.399276	0.0172776	ENSG00000255537	AP000708,1
922.513	0.399273	0.00500278	ENSG00000030066	NUP160
1951.56	0.397753	8.10787e-05	ENSG00000140740	UQCRC2
2122.74	0.397332	2.67911e-05	ENSG00000226777	FAM30A
234.496	0.397172	0.0466392	ENSG00000233351	AL356124,2
448.726	0.396271	0.0193367	ENSG00000185303	SFTPA2
1598.72	0.396196	0.000743794	ENSG00000013810	TACC3
545.499	0.393917	0.00347931	ENSG00000068400	GRIPAP1
657.928	0.393735	0.00970507	ENSG00000135838	NPL
578.404	0.393527	0.0126565	ENSG00000109920	FNBP4
666.046	0.393444	0.0125356	ENSG00000127564	PKMYT1
447.894	0.393052	0.00473568	ENSG00000290722
1129.25	0.392891	0.0127235	ENSG00000164967	RPP25L
328.39	0.392484	0.0158936	ENSG00000164694	FNDC1
5053.01	0.39188	1.48192e-05	ENSG00000124942	AHNAK
1567.37	0.390574	0.0010878	ENSG00000132016	C19orf57
1711.39	0.390485	0.00179208	ENSG00000136828	RALGPS1
1268.6	0.38952	0.000110849	ENSG00000095066	HOOK2
1402.34	0.38927	0.00680095	ENSG00000107404	DVL1
537.773	0.388872	0.00344704	ENSG00000139697	SBNO1
2097.7	0.388479	5.71996e-05	ENSG00000087274	ADD1
2355.97	0.38833	0.0127007	ENSG00000174177	CTU2
293.649	0.388302	0.0245138	ENSG00000076650	GPATCH1
2279.51	0.388235	0.000381075	ENSG00000227232	WASH7P
356.94	0.386623	0.0278478	ENSG00000215252	GOLGA8B
1636.39	0.386536	0.00200493	ENSG00000170515	PA2G4
2544.75	0.386241	5.77079e-05	ENSG00000235560	AC002310,1
613.65	0.38575	0.0153026	ENSG00000169902	TPST1
1135.85	0.385714	0.000614382	ENSG00000105613	MAST1
718.766	0.385666	0.00497313	ENSG00000168528	SERINC2
2751.42	0.385154	0.00432853	ENSG00000179148	ALOXE3
264.97	0.385069	0.0105272	ENSG00000158859	ADAMTS4
328.592	0.384351	0.0111424	ENSG00000026950	BTN3A1
499.707	0.384147	0.00974222	ENSG00000065361	ERBB3
324.701	0.383706	0.011714	ENSG00000204574	ABCF1
342.732	0.383169	0.0192365	ENSG00000087076	HSD17B14
322.321	0.383053	0.0143321	ENSG00000246130	AC107959,2
1459.96	0.38298	9.41515e-05	ENSG00000130988	RGN
259.559	0.382571	0.0119105	ENSG00000169504	CLIC4
909.498	0.382089	0.00618618	ENSG00000063978	RNF4
249.163	0.380858	0.0133016	ENSG00000149646	CNBD2
315.486	0.380355	0.00762598	ENSG00000237663	DNAJC19P7
453.862	0.379133	0.00831127	ENSG00000226835	AC097059,1
2322.6	0.37896	0.00031367	ENSG00000136068	FLNB
1319.34	0.378665	0.00145701	ENSG00000143314	MRPL24
1236.6	0.378259	0.0127481	ENSG00000080608	PUM3
494.665	0.378255	0.0422978	ENSG00000197111	PCBP2
1895.46	0.37802	0.000807763	ENSG00000198551	ZNF627
620.777	0.377226	0.0111095	ENSG00000145506	NKD2
472.647	0.376882	0.0165847	ENSG00000070366	SMG6
1592.09	0.376874	3.31761e-05	ENSG00000159403	C1R
1102.35	0.376835	0.00925021	ENSG00000172324	OR5A2
792.671	0.376832	0.0461561	ENSG00000178498	DTX3
383.355	0.37649	0.0441281	ENSG00000144589	STK11IP
588.094	0.376317	0.0197157	ENSG00000134571	MYBPC3
259.355	0.376203	0.0405391	ENSG00000076555	ACACB
205.553	0.376182	0.037861	ENSG00000129450	SIGLEC9
1114.57	0.375735	0.000540412	ENSG00000096433	ITPR3
454.876	0.375691	0.00469569	ENSG00000140527	WDR93
689.83	0.374833	0.00163624	ENSG00000163125	RPRD2
3105.04	0.374578	0.000397194	ENSG00000136492	BRIP1
2004.08	0.373006	0.00033396	ENSG00000125482	TTF1
557.33	0.372233	0.0102992	ENSG00000006047	YBX2
983.678	0.371719	0.000936643	ENSG00000175115	PACS1
6614.3	0.371626	0.0087592	ENSG00000112759	SLC29A1
4683.99	0.371451	7.42892e-05	ENSG00000104897	SF3A2
617.973	0.370447	0.0138812	ENSG00000002549	LAP3
440.691	0.370076	0.015503	ENSG00000067836	ROGDI
568.749	0.370034	0.0102691	ENSG00000186470	BTN3A2
553.972	0.369752	0.0229695	ENSG00000239701	AC006512,1
704.489	0.369416	0.00218003	ENSG00000197245	FAM110D
340.174	0.36892	0.0242896	ENSG00000236675	MTX1P1
405.092	0.368482	0.0294285	ENSG00000253338	IGLV3-29
945.149	0.367857	0.0196341	ENSG00000169180	XPO6
1121.62	0.366957	0.000187627	ENSG00000197748	CFAP43
1572.46	0.366725	0.000569728	ENSG00000112655	PTK7
3077.37	0.36642	0.00141821	ENSG00000029725	RABEP1
1054.5	0.365259	0.0121992	ENSG00000139641	ESYT1
1639.71	0.365191	0.0335057	ENSG00000291040
364.477	0.364306	0.0243459	ENSG00000013503	POLR3B
1455.88	0.363532	0.00907708	ENSG00000172057	ORMDL3
321.43	0.363528	0.010684	ENSG00000087903	RFX2
684.092	0.363347	0.0301834	ENSG00000233441	CYP2AB1P
589.947	0.363334	0.0236207	ENSG00000144674	GOLGA4
1360.07	0.363213	0.00041402	ENSG00000124587	PEX6
7406.87	0.362604	0.0064602	ENSG00000185022	MAFF
1508.83	0.362272	0.000247502	ENSG00000145147	SLIT2
489.819	0.361546	0.00997172	ENSG00000089154	GCN1
1618.68	0.36148	0.00159254	ENSG00000174945	AMZ1
400.563	0.360864	0.0149088	ENSG00000117153	KLHL12
720.068	0.360755	0.0024335	ENSG00000264772	AC016876,2
1308.36	0.360095	0.00098396	ENSG00000197213	ZSCAN5B
773.687	0.359018	0.000308108	ENSG00000168758	SEMA4C
6222.83	0.358419	0.00086279	ENSG00000142230	SAE1
883.779	0.357597	0.00527513	ENSG00000121753	ADGRB2
214.473	0.356549	0.0317404	ENSG00000143614	GATAD2B
343.718	0.355036	0.0383434	ENSG00000143164	DCAF6
395.766	0.354367	0.0323292	ENSG00000143387	CTSK
2203.13	0.354087	0.000732608	ENSG00000086758	HUWE1
444.029	0.352568	0.00744415	ENSG00000158270	COLEC12
988.815	0.352332	0.000296509	ENSG00000227057	WDR46
592.632	0.350684	0.00279885	ENSG00000088832	FKBP1A
354.519	0.350354	0.00919097	ENSG00000178997	EXD1
192.233	0.350274	0.0465068	ENSG00000011566	MAP4K3
488.077	0.350021	0.0248154	ENSG00000144591	GMPPA
346.338	0.349552	0.0408745	ENSG00000130338	TULP4
421.288	0.349477	0.0449385	ENSG00000261156	LINC01989
342.953	0.349311	0.0213154	ENSG00000115255	REEP6
1079.09	0.348566	0.00221248	ENSG00000104884	ERCC2
730.148	0.347871	0.0142394	ENSG00000160094	ZNF362
632.502	0.347183	0.0324518	ENSG00000275074	NUDT18
365.563	0.347165	0.0371897	ENSG00000142675	CNKSR1
1288.37	0.346412	0.000125412	ENSG00000110066	KMT5B
371.006	0.346315	0.0419526	ENSG00000148200	NR6A1
437.299	0.346175	0.0311285	ENSG00000114978	MOB1A
1421.21	0.34564	0.00594733	ENSG00000174738	NR1D2
1831.81	0.345376	3.91568e-05	ENSG00000126091	ST3GAL3
5898.04	0.345116	0.00186463	ENSG00000196365	LONP1
1072	0.344999	0.00334443	ENSG00000180251	SLC9A4
864.384	0.344524	0.00942927	ENSG00000254503	AC010319,1
392.655	0.344179	0.0109933	ENSG00000184216	IRAK1
828.341	0.343851	0.000938353	ENSG00000164889	SLC4A2
1961.56	0.343658	0.00227205	ENSG00000125733	TRIP10
3285.31	0.34355	0.00176252	ENSG00000198837	DENND4B
1026.01	0.343458	0.0069985	ENSG00000123130	ACOT9
2256.66	0.343446	0.0120743	ENSG00000072506	HSD17B10
715.158	0.340489	0.026409	ENSG00000132846	ZBED3
1029.85	0.33982	0.0116467	ENSG00000113732	ATP6V0E1
1677.87	0.339138	0.0333396	ENSG00000205593	DENND6B
2839.22	0.338977	0.0171836	ENSG00000128191	DGCR8
398.336	0.33807	0.034599	ENSG00000067606	PRKCZ
1090.4	0.337485	0.00910883	ENSG00000170624	SGCD
914.785	0.33746	0.00348749	ENSG00000181555	SETD2
375.548	0.337024	0.0127882	ENSG00000293478
2066.79	0.336869	0.0110161	ENSG00000225921	NOL7
671.632	0.336503	0.00585346	ENSG00000172985	SH3RF3
538.049	0.336315	0.0124934	ENSG00000007202	KIAA0100
1216.68	0.335527	0.0242916	ENSG00000163798	SLC4A1AP
2320.18	0.335238	0.000638819	ENSG00000107960	STN1
2453.37	0.334941	0.00103838	ENSG00000162241	SLC25A45
651.344	0.333245	0.0084726	ENSG00000106258	CYP3A5
2167.46	0.333163	0.00520357	ENSG00000108433	GOSR2
2270.33	0.332428	0.00311395	ENSG00000243491	AC082651,3
374.974	0.331021	0.0355314	ENSG00000253831	ETV3L
584.456	0.330104	0.0063111	ENSG00000248333	CDK11B
837.105	0.329864	0.0244992	ENSG00000262691	AC040160,1
4358.5	0.329297	0.0392607	ENSG00000145494	NDUFS6
428.55	0.328137	0.0163258	ENSG00000134470	IL15RA
2287.13	0.326477	0.000165733	ENSG00000160087	UBE2J2
463.154	0.325616	0.0126532	ENSG00000287125
2413.18	0.32423	0.000217174	ENSG00000165055	METTL2B
1036.74	0.323766	0.0197566	ENSG00000013275	PSMC4
1062.91	0.322397	0.00917051	ENSG00000170860	LSM3
328.101	0.321739	0.0342899	ENSG00000178773	CPNE7
897.365	0.320912	0.0194797	ENSG00000166278	C2
655.194	0.320553	0.0129246	ENSG00000279920	LINC01651
305.458	0.31935	0.0221278	ENSG00000132155	RAF1
574.227	0.319305	0.008618	ENSG00000168303	MPLKIP
3892.3	0.318759	0.00469937	ENSG00000168067	MAP4K2
438.973	0.318646	0.0497132	ENSG00000032742	IFT88
463.625	0.318342	0.0206749	ENSG00000198435	NRARP
864.783	0.318127	0.0399566	ENSG00000186393	KRT26
362.32	0.316606	0.0359376	ENSG00000186847	KRT14
1402.12	0.314852	0.00560356	ENSG00000132604	TERF2
619.987	0.313878	0.0101435	ENSG00000157350	ST3GAL2
1539.09	0.313162	0.000723364	ENSG00000141252	VPS53
911.653	0.312808	0.00809685	ENSG00000270441	AC135506,1
587.431	0.312787	0.0366525	ENSG00000156398	SFXN2
1510.93	0.311652	0.0049826	ENSG00000143612	C1orf43
376.509	0.31016	0.015318	ENSG00000146839	ZAN
243.835	0.310019	0.0407577	ENSG00000187555	USP7
639.822	0.309487	0.0115315	ENSG00000137343	ATAT1
808.797	0.30904	0.0260431	ENSG00000290775
1168.82	0.308983	0.000412261	ENSG00000112877	CEP72
592.851	0.307871	0.0474252	ENSG00000135837	CEP350
1967.85	0.307565	0.0010796	ENSG00000206779	RF00019
1600.16	0.306919	0.00328943	ENSG00000137877	SPTBN5
849.205	0.30549	0.0222582	ENSG00000157191	NECAP2
730.124	0.305101	0.0353645	ENSG00000127054	INTS11
34415.4	0.304895	0.0151852	ENSG00000137154	RPS6
3648.67	0.304214	0.0392329	ENSG00000236653	LINC01923
2819.04	0.304187	0.0432682	ENSG00000173545	ZNF622
2282.71	0.30358	0.000102781	ENSG00000076108	BAZ2A
692.795	0.301719	0.0424376	ENSG00000128298	BAIAP2L2
1866.21	0.299985	0.000733105	ENSG00000141905	NFIC
2967.07	0.299832	0.00133162	ENSG00000184110	EIF3C
7133.88	0.299795	0.00250036	ENSG00000166341	DCHS1
1095.89	0.299291	0.0101757	ENSG00000162521	RBBP4
1138.19	0.29879	0.00238847	ENSG00000137054	POLR1E
5624.62	0.29832	0.0080283	ENSG00000223356	AL590666,1
1017.3	0.297176	0.00358834	ENSG00000158796	DEDD
1315.56	0.295674	0.0392051	ENSG00000132681	ATP1A4
929.644	0.295386	0.00720321	ENSG00000178445	GLDC
588.507	0.295059	0.0492638	ENSG00000100162	CENPM
962.73	0.294621	0.0112454	ENSG00000198853	RUSC2
9914.51	0.294608	0.0159834	ENSG00000213085	CFAP45
762.582	0.29455	0.034291	ENSG00000222931	RN7SKP205
623.181	0.293092	0.0288137	ENSG00000171443	ZNF524
2530.45	0.292238	0.0181902	ENSG00000087206	UIMC1
1079.03	0.290963	0.00862308	ENSG00000125755	SYMPK
1978.46	0.289738	0.00387218	ENSG00000134684	YARS
1301.82	0.287664	0.00302498	ENSG00000132002	DNAJB1
306.927	0.287046	0.0485652	ENSG00000180817	PPA1
763.29	0.286685	0.0187114	ENSG00000099308	MAST3
5896.57	0.286541	0.000441171	ENSG00000005339	CREBBP
1121.68	0.28643	0.0189525	ENSG00000168096	ANKS3
570.244	0.286343	0.0484121	ENSG00000165548	TMEM63C
606.446	0.285785	0.0161958	ENSG00000271639	AC019072,1
717.345	0.285226	0.0326998	ENSG00000221963	APOL6
2943.1	0.284375	0.00853461	ENSG00000104881	PPP1R13L
2719.08	0.283676	0.00234883	ENSG00000072958	AP1M1
287.357	0.283376	0.0497877	ENSG00000170006	TMEM154
503.92	0.281788	0.0185532	ENSG00000137502	RAB30
1192.81	0.281137	0.0297996	ENSG00000058453	CROCC
1943.2	0.28081	0.0220563	ENSG00000115286	NDUFS7
8646.6	0.280427	0.00120096	ENSG00000099817	POLR2E
2945.5	0.280156	0.0270787	ENSG00000167962	ZNF598
475.264	0.279352	0.0492662	ENSG00000144746	ARL6IP5
3142.9	0.279193	0.0169623	ENSG00000125656	CLPP
1015.56	0.279111	0.0347177	ENSG00000162490	DRAXIN
806.518	0.278154	0.0498979	ENSG00000228606	AL139011,1
3676.79	0.277232	0.00146888	ENSG00000176014	TUBB6
4822.88	0.277149	0.00409285	ENSG00000104964	AES
4787.69	0.2769	0.00205753	ENSG00000293160
1076.69	0.275874	0.00592501	ENSG00000232725	U52111,1
3288.92	0.274932	0.0375295	ENSG00000107187	LHX3
1388.96	0.274708	0.0155533	ENSG00000166986	MARS
697.046	0.274261	0.0141595	ENSG00000110169	HPX
1680.83	0.272507	0.00312673	ENSG00000107185	RGP1
1439.2	0.272317	0.0147362	ENSG00000253279	LINC02209
1595.91	0.271535	0.00205367	ENSG00000198722	UNC13B
1920.04	0.270796	0.00495613	ENSG00000100626	GALNT16
14249.4	0.270528	0.00874646	ENSG00000067842	ATP2B3
618.121	0.269878	0.019804	ENSG00000271425	NBPF10
13922.9	0.267529	0.00796856	ENSG00000039987	BEST2
595.036	0.26732	0.0236101	ENSG00000141013	GAS8
1520.61	0.266967	0.0158203	ENSG00000068078	FGFR3
1061.46	0.265548	0.018024	ENSG00000175899	A2M
922.631	0.265136	0.0360803	ENSG00000104679	R3HCC1
565.881	0.265123	0.02861	ENSG00000013288	MAN2B2
1739.52	0.264901	0.0264352	ENSG00000182057	OGFRP1
3412.31	0.263676	0.0435813	ENSG00000169221	TBC1D10B
5215.44	0.262458	0.042657	ENSG00000141519	CCDC40
3554.49	0.262452	0.00391928	ENSG00000123933	MXD4
817.654	0.261952	0.0473076	ENSG00000101224	CDC25B
2178.48	0.261522	0.00314632	ENSG00000159352	PSMD4
918.282	0.261222	0.0292685	ENSG00000103342	GSPT1
601.656	0.260105	0.0493704	ENSG00000125835	SNRPB
624.119	0.259991	0.0416823	ENSG00000186638	KIF24
3870.22	0.258196	0.00224115	ENSG00000064961	HMG20B
16741.6	0.25731	0.00333012	ENSG00000166866	MYO1A
3241.84	0.256748	0.0140804	ENSG00000167595	PROSER3
1448.34	0.256124	0.00173786	ENSG00000105298	CACTIN
5124.62	0.256027	0.00262419	ENSG00000177963	RIC8A
1951.24	0.255529	0.039289	ENSG00000087087	SRRT
1045.35	0.254331	0.0366683	ENSG00000126391	FRMD8
2254.74	0.253184	0.0137959	ENSG00000274611	TBC1D3
6087.12	0.253151	0.0273829	ENSG00000073578	SDHA
839.602	0.251333	0.0284622	ENSG00000105402	NAPA
3692.2	0.249788	0.00680122	ENSG00000031823	RANBP3
2253.38	0.246013	0.0295488	ENSG00000100307	CBX7
1156	0.24583	0.041578	ENSG00000087266	SH3BP2
7529.71	0.242896	0.0240441	ENSG00000243468	INGX
2378.49	0.242069	0.036758	ENSG00000156381	ANKRD9
4495.88	0.240599	0.0032661	ENSG00000141985	SH3GL1
603.162	0.240406	0.0261485	ENSG00000241973	PI4KA
907.966	0.240191	0.0147671	ENSG00000182326	C1S
5223.73	0.239811	0.0386748	ENSG00000118680	MYL12B
1265	0.239492	0.0467421	ENSG00000197653	DNAH10
2480.94	0.237688	0.015699	ENSG00000073792	IGF2BP2
7513.99	0.233559	0.0394114	ENSG00000186575	NF2
1112.87	0.233534	0.0415958	ENSG00000171954	CYP4F22
4223.47	0.233006	0.00272942	ENSG00000124253	PCK1
629.519	0.232879	0.0416281	ENSG00000285531
884.068	0.231944	0.0475032	ENSG00000133958	UNC79
1534.41	0.23174	0.0393386	ENSG00000086102	NFX1
15471.1	0.229713	0.015665	ENSG00000212802	RPL15P3
1612.92	0.226662	0.0272357	ENSG00000136367	ZFHX2
8832.36	0.223993	0.0162512	ENSG00000145555	MYO10
[truncated: 2,379 more rows]
